# Supplementary material for: On the understanding of BF3·Et2O-promoted intra- and intermolecular amination and oxygenation of unfunctionalized olefins
Source: Royal Society of Chemistry journal article supplement (doi:10.1039/c5ra10513g), 2015-01-01
Supplement: c5ra10513g1.pdf [file c5ra10513g1.pdf]

**Supporting Information:**

**On the Understanding of  $\text{BF}_3 \cdot \text{Et}_2\text{O}$ -Promoted Intra- and Intermolecular Amination and Oxygenation of Unfunctionalized Olefins**

Chun-Hua Yang,<sup>a</sup> Wen-Wen Fan,<sup>a</sup> Gong-Qing Liu,<sup>a</sup> Li-Li Duan,<sup>a</sup> Lin Li<sup>a</sup> and  
Yue-Ming Li<sup>a,b\*</sup>

<sup>a</sup> *State Key Laboratory of Medicinal Chemical Biology, College of Pharmacy, and Tianjin Key Laboratory of Molecular Drug Research, Nankai University, Tianjin 300071, People's Republic of China*

<sup>b</sup> *CAS Key Laboratory of Synthetic Chemistry of Natural Substances, Shanghai Institute of Organic Chemistry, Chinese Academy of Sciences, 345 Lingling Road, Shanghai 200032, People's Republic of China*

*E-mail: ymli@nankai.edu.cn*

**Table of Contents**

|                                                                          |    |
|--------------------------------------------------------------------------|----|
| 1. Cartesian coordinates and energies for calculated intermediates ..... | 1  |
| 2. Mechanism Studies .....                                               | 14 |
| 3. Copies of NMR Spectra .....                                           | 15 |
| 4. X-ray crystal structure and data of compound <b>2h</b> .....          | 58 |
| 5. X-ray crystal structure and data of compound <b>2j</b> .....          | 71 |

# 1. Cartesian coordinates and energies for calculated intermediates

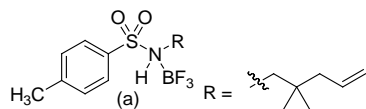

|                                              |                             |
|----------------------------------------------|-----------------------------|
| Zero-point correction=                       | 0.347060 (Hartree/Particle) |
| Thermal correction to Energy=                | 0.370100                    |
| Thermal correction to Enthalpy=              | 0.371044                    |
| Thermal correction to Gibbs Free Energy=     | 0.294598                    |
| Sum of electronic and zero-point Energies=   | -1473.692730                |
| Sum of electronic and thermal Energies=      | -1473.669690                |
| Sum of electronic and thermal Enthalpies=    | -1473.668745                |
| Sum of electronic and thermal Free Energies= | -1473.745192                |

## Cartesian Coordinates

| Center Number | Atomic Number | Atomic Type | Coordinates (Angstroms) |           |           |
|---------------|---------------|-------------|-------------------------|-----------|-----------|
|               |               |             | X                       | Y         | Z         |
| 1             | 6             | 0           | -0.834681               | 0.386915  | -0.501573 |
| 2             | 1             | 0           | -1.353111               | -0.555357 | -0.339630 |
| 3             | 1             | 0           | -0.255749               | 0.480264  | -1.415217 |
| 4             | 6             | 0           | -0.907977               | 1.381367  | 0.377694  |
| 5             | 1             | 0           | -0.371718               | 2.305452  | 0.170098  |
| 6             | 6             | 0           | -1.694601               | 1.338266  | 1.653370  |
| 7             | 1             | 0           | -2.048994               | 0.316846  | 1.833722  |
| 8             | 1             | 0           | -1.034824               | 1.600674  | 2.488054  |
| 9             | 6             | 0           | -2.914448               | 2.301669  | 1.719525  |
| 10            | 6             | 0           | -2.469323               | 3.737533  | 1.426871  |
| 11            | 1             | 0           | -2.104319               | 3.870233  | 0.402897  |
| 12            | 1             | 0           | -3.277501               | 4.454215  | 1.606737  |
| 13            | 1             | 0           | -1.649900               | 4.008223  | 2.098157  |
| 14            | 6             | 0           | -3.466893               | 2.222162  | 3.148336  |
| 15            | 1             | 0           | -4.342646               | 2.857774  | 3.273832  |
| 16            | 1             | 0           | -3.748774               | 1.193602  | 3.396747  |
| 17            | 1             | 0           | -2.702678               | 2.541265  | 3.863412  |
| 18            | 6             | 0           | -3.955347               | 1.770678  | 0.692627  |
| 19            | 1             | 0           | -3.452848               | 1.112407  | -0.012624 |
| 20            | 1             | 0           | -4.722217               | 1.172429  | 1.184830  |
| 21            | 7             | 0           | -4.661313               | 2.776820  | -0.185517 |
| 22            | 1             | 0           | -4.088558               | 3.626285  | -0.254858 |
| 23            | 6             | 0           | -7.374517               | 2.146991  | 0.153879  |

|    |    |   |            |           |           |
|----|----|---|------------|-----------|-----------|
| 24 | 6  | 0 | -8.102737  | 2.170627  | -1.031016 |
| 25 | 6  | 0 | -7.552874  | 1.150048  | 1.109734  |
| 26 | 6  | 0 | -9.024413  | 1.162023  | -1.258646 |
| 27 | 1  | 0 | -7.946907  | 2.954799  | -1.760358 |
| 28 | 6  | 0 | -8.475832  | 0.149646  | 0.856102  |
| 29 | 1  | 0 | -6.992579  | 1.161064  | 2.036735  |
| 30 | 6  | 0 | -9.221794  | 0.139803  | -0.326321 |
| 31 | 1  | 0 | -9.597379  | 1.166525  | -2.179348 |
| 32 | 1  | 0 | -8.623088  | -0.634220 | 1.590979  |
| 33 | 16 | 0 | -6.207802  | 3.421190  | 0.473826  |
| 34 | 8  | 0 | -6.001242  | 3.540808  | 1.899242  |
| 35 | 8  | 0 | -6.467145  | 4.596757  | -0.321635 |
| 36 | 6  | 0 | -10.239398 | -0.936303 | -0.572702 |
| 37 | 1  | 0 | -10.424657 | -1.071192 | -1.639815 |
| 38 | 1  | 0 | -9.915767  | -1.888951 | -0.148235 |
| 39 | 1  | 0 | -11.190134 | -0.670236 | -0.099116 |
| 40 | 5  | 0 | -4.708425  | 2.214779  | -1.750881 |
| 41 | 9  | 0 | -3.381465  | 2.265744  | -2.159323 |
| 42 | 9  | 0 | -5.195790  | 0.920018  | -1.710094 |
| 43 | 9  | 0 | -5.505447  | 3.053780  | -2.503201 |

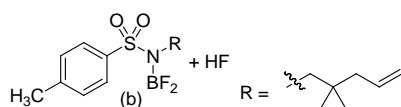

|                                              |                             |
|----------------------------------------------|-----------------------------|
| Zero-point correction=                       | 0.344422 (Hartree/Particle) |
| Thermal correction to Energy=                | 0.368431                    |
| Thermal correction to Enthalpy=              | 0.369375                    |
| Thermal correction to Gibbs Free Energy=     | 0.289922                    |
| Sum of electronic and zero-point Energies=   | -1473.672788                |
| Sum of electronic and thermal Energies=      | -1473.648780                |
| Sum of electronic and thermal Enthalpies=    | -1473.647836                |
| Sum of electronic and thermal Free Energies= | -1473.727289                |

#### Cartesian Coordinates

| Center<br>Number | Atomic<br>Number | Atomic<br>Type | Coordinates (Angstroms) |          |          |
|------------------|------------------|----------------|-------------------------|----------|----------|
|                  |                  |                | X                       | Y        | Z        |
| 1                | 6                | 0              | 1.566801                | 3.536057 | 1.630361 |
| 2                | 1                | 0              | 0.740240                | 3.901436 | 2.235519 |
| 3                | 1                | 0              | 2.515879                | 3.378793 | 2.133895 |
| 4                | 6                | 0              | 1.423308                | 3.297478 | 0.330043 |

|    |    |   |           |           |           |
|----|----|---|-----------|-----------|-----------|
| 5  | 1  | 0 | 2.280674  | 2.932648  | -0.232416 |
| 6  | 6  | 0 | 0.149753  | 3.489143  | -0.441956 |
| 7  | 1  | 0 | -0.560543 | 4.069727  | 0.157925  |
| 8  | 1  | 0 | 0.367797  | 4.078090  | -1.339948 |
| 9  | 6  | 0 | -0.543517 | 2.179550  | -0.911202 |
| 10 | 6  | 0 | 0.439638  | 1.297218  | -1.682745 |
| 11 | 1  | 0 | 1.298925  | 1.000841  | -1.079512 |
| 12 | 1  | 0 | -0.051151 | 0.388766  | -2.041092 |
| 13 | 1  | 0 | 0.812398  | 1.840995  | -2.556215 |
| 14 | 6  | 0 | -1.687083 | 2.571683  | -1.853015 |
| 15 | 1  | 0 | -2.182736 | 1.694733  | -2.277808 |
| 16 | 1  | 0 | -2.440432 | 3.178133  | -1.341978 |
| 17 | 1  | 0 | -1.290823 | 3.153505  | -2.690662 |
| 18 | 6  | 0 | -1.070063 | 1.502704  | 0.374561  |
| 19 | 1  | 0 | -0.274546 | 1.500826  | 1.120177  |
| 20 | 1  | 0 | -1.883555 | 2.098067  | 0.794663  |
| 21 | 7  | 0 | -1.546883 | 0.099455  | 0.237440  |
| 22 | 6  | 0 | 0.902106  | -1.117874 | 0.546507  |
| 23 | 6  | 0 | 1.139084  | -1.834362 | -0.623057 |
| 24 | 6  | 0 | 1.917462  | -0.436573 | 1.203820  |
| 25 | 6  | 0 | 2.421690  | -1.854378 | -1.139937 |
| 26 | 1  | 0 | 0.337884  | -2.355207 | -1.133688 |
| 27 | 6  | 0 | 3.198004  | -0.470352 | 0.668092  |
| 28 | 1  | 0 | 1.712675  | 0.115210  | 2.112958  |
| 29 | 6  | 0 | 3.467542  | -1.171575 | -0.506894 |
| 30 | 1  | 0 | 2.617898  | -2.404323 | -2.054225 |
| 31 | 1  | 0 | 3.997568  | 0.061984  | 1.171694  |
| 32 | 16 | 0 | -0.738409 | -1.026636 | 1.190605  |
| 33 | 8  | 0 | -0.675423 | -0.508838 | 2.541106  |
| 34 | 8  | 0 | -1.412374 | -2.307226 | 0.994152  |
| 35 | 6  | 0 | 4.852855  | -1.212198 | -1.085113 |
| 36 | 1  | 0 | 4.831830  | -1.017796 | -2.160452 |
| 37 | 1  | 0 | 5.504856  | -0.477021 | -0.610328 |
| 38 | 1  | 0 | 5.296942  | -2.202109 | -0.940901 |
| 39 | 5  | 0 | -2.833077 | -0.178627 | -0.318037 |
| 40 | 9  | 0 | -3.691175 | 0.822210  | -0.507821 |
| 41 | 9  | 0 | -1.691099 | -4.146946 | -0.786397 |
| 42 | 9  | 0 | -3.245881 | -1.383111 | -0.686027 |
| 43 | 1  | 0 | -1.603843 | -3.455387 | -0.149924 |

---

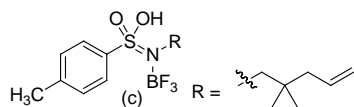

Zero-point correction= 0.344886 (Hartree/Particle)  
 Thermal correction to Energy= 0.368123  
 Thermal correction to Enthalpy= 0.369068  
 Thermal correction to Gibbs Free Energy= 0.292086  
 Sum of electronic and zero-point Energies= -1473.679191  
 Sum of electronic and thermal Energies= -1473.655954  
 Sum of electronic and thermal Enthalpies= -1473.655009  
 Sum of electronic and thermal Free Energies= -1473.731991

#### Cartesian Coordinates

| Center<br>Number | Atomic<br>Number | Atomic<br>Type | Coordinates (Angstroms) |           |           |
|------------------|------------------|----------------|-------------------------|-----------|-----------|
|                  |                  |                | X                       | Y         | Z         |
| 1                | 6                | 0              | -4.642066               | 1.633860  | 2.667643  |
| 2                | 1                | 0              | -5.544033               | 1.050248  | 2.497919  |
| 3                | 1                | 0              | -4.463410               | 1.985661  | 3.679223  |
| 4                | 6                | 0              | -3.798200               | 1.908584  | 1.677297  |
| 5                | 1                | 0              | -2.908304               | 2.496952  | 1.894293  |
| 6                | 6                | 0              | -3.985275               | 1.468415  | 0.254529  |
| 7                | 1                | 0              | -4.957425               | 0.972809  | 0.153865  |
| 8                | 1                | 0              | -4.010083               | 2.355631  | -0.389938 |
| 9                | 6                | 0              | -2.887322               | 0.529336  | -0.307894 |
| 10               | 6                | 0              | -1.523916               | 1.226849  | -0.293432 |
| 11               | 1                | 0              | -1.188664               | 1.454881  | 0.720802  |
| 12               | 1                | 0              | -0.757615               | 0.602563  | -0.760678 |
| 13               | 1                | 0              | -1.573811               | 2.163142  | -0.858171 |
| 14               | 6                | 0              | -3.260589               | 0.180199  | -1.751117 |
| 15               | 1                | 0              | -2.506561               | -0.460784 | -2.213522 |
| 16               | 1                | 0              | -4.223113               | -0.337239 | -1.802726 |
| 17               | 1                | 0              | -3.335376               | 1.093538  | -2.349302 |
| 18               | 6                | 0              | -2.880854               | -0.727566 | 0.578592  |
| 19               | 1                | 0              | -2.572471               | -0.460215 | 1.589970  |
| 20               | 1                | 0              | -3.887293               | -1.138303 | 0.647793  |
| 21               | 7                | 0              | -2.012928               | -1.827899 | 0.070991  |
| 22               | 6                | 0              | 0.499127                | -2.752331 | -0.278850 |
| 23               | 6                | 0              | 0.623117                | -2.120092 | -1.512153 |
| 24               | 6                | 0              | 1.329858                | -3.803122 | 0.098303  |
| 25               | 6                | 0              | 1.595009                | -2.570479 | -2.389381 |
| 26               | 1                | 0              | -0.039593               | -1.312549 | -1.795542 |

|    |    |   |           |           |           |
|----|----|---|-----------|-----------|-----------|
| 27 | 6  | 0 | 2.293124  | -4.234794 | -0.798066 |
| 28 | 1  | 0 | 1.224778  | -4.285039 | 1.061850  |
| 29 | 6  | 0 | 2.439717  | -3.630652 | -2.049780 |
| 30 | 1  | 0 | 1.691943  | -2.096085 | -3.359556 |
| 31 | 1  | 0 | 2.937449  | -5.062201 | -0.522124 |
| 32 | 16 | 0 | -0.671071 | -2.110491 | 0.866297  |
| 33 | 8  | 0 | -0.183955 | -1.000408 | 1.644099  |
| 34 | 8  | 0 | -0.887301 | -3.297686 | 1.915508  |
| 35 | 6  | 0 | 3.498901  | -4.101034 | -3.003571 |
| 36 | 1  | 0 | 3.685023  | -5.170796 | -2.889942 |
| 37 | 1  | 0 | 3.218896  | -3.899311 | -4.039186 |
| 38 | 1  | 0 | 4.440783  | -3.578329 | -2.806502 |
| 39 | 5  | 0 | -2.635954 | -3.011728 | -0.792911 |
| 40 | 9  | 0 | -2.214980 | -2.952839 | -2.116821 |
| 41 | 9  | 0 | -4.018930 | -2.942984 | -0.706630 |
| 42 | 9  | 0 | -2.180784 | -4.241726 | -0.219672 |
| 43 | 1  | 0 | -1.401442 | -4.012321 | 1.487882  |

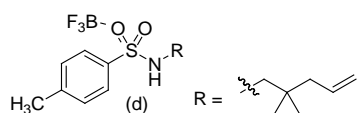

|                                              |                             |
|----------------------------------------------|-----------------------------|
| Zero-point correction=                       | 0.344695 (Hartree/Particle) |
| Thermal correction to Energy=                | 0.368323                    |
| Thermal correction to Enthalpy=              | 0.369267                    |
| Thermal correction to Gibbs Free Energy=     | 0.290363                    |
| Sum of electronic and zero-point Energies=   | -1473.700146                |
| Sum of electronic and thermal Energies=      | -1473.676518                |
| Sum of electronic and thermal Enthalpies=    | -1473.675574                |
| Sum of electronic and thermal Free Energies= | -1473.754479                |

#### Cartesian Coordinates

| Center Number | Atomic Number | Atomic Type | Coordinates (Angstroms) |           |           |
|---------------|---------------|-------------|-------------------------|-----------|-----------|
|               |               |             | X                       | Y         | Z         |
| 1             | 6             | 0           | 2.395811                | -2.684705 | 1.873171  |
| 2             | 1             | 0           | 3.185027                | -2.146883 | 2.393743  |
| 3             | 1             | 0           | 1.770972                | -3.342567 | 2.469630  |
| 4             | 6             | 0           | 2.207503                | -2.544420 | 0.564336  |
| 5             | 1             | 0           | 1.404605                | -3.103465 | 0.086963  |
| 6             | 6             | 0           | 3.027612                | -1.655770 | -0.326086 |
| 7             | 1             | 0           | 3.899462                | -1.287490 | 0.226503  |
| 8             | 1             | 0           | 3.406477                | -2.247532 | -1.167593 |

|    |    |   |           |           |           |
|----|----|---|-----------|-----------|-----------|
| 9  | 6  | 0 | 2.264703  | -0.445858 | -0.922175 |
| 10 | 6  | 0 | 1.020303  | -0.907060 | -1.687659 |
| 11 | 1  | 0 | 0.273320  | -1.350566 | -1.023033 |
| 12 | 1  | 0 | 0.549200  | -0.067472 | -2.204625 |
| 13 | 1  | 0 | 1.295598  | -1.653589 | -2.438865 |
| 14 | 6  | 0 | 3.205202  | 0.304219  | -1.869925 |
| 15 | 1  | 0 | 2.720903  | 1.189695  | -2.294122 |
| 16 | 1  | 0 | 4.114565  | 0.626273  | -1.352064 |
| 17 | 1  | 0 | 3.500339  | -0.339275 | -2.704210 |
| 18 | 6  | 0 | 1.871334  | 0.462405  | 0.251055  |
| 19 | 1  | 0 | 1.267029  | -0.105052 | 0.960295  |
| 20 | 1  | 0 | 2.758778  | 0.808448  | 0.787536  |
| 21 | 7  | 0 | 1.096542  | 1.636358  | -0.189895 |
| 22 | 1  | 0 | 1.629883  | 2.447669  | -0.490669 |
| 23 | 6  | 0 | -1.341820 | 0.711254  | 0.438402  |
| 24 | 6  | 0 | -2.057933 | 0.598558  | -0.748686 |
| 25 | 6  | 0 | -1.427256 | -0.243989 | 1.444732  |
| 26 | 6  | 0 | -2.882586 | -0.500197 | -0.920549 |
| 27 | 1  | 0 | -1.974407 | 1.349493  | -1.525585 |
| 28 | 6  | 0 | -2.257218 | -1.335946 | 1.247921  |
| 29 | 1  | 0 | -0.863391 | -0.142663 | 2.363542  |
| 30 | 6  | 0 | -2.996090 | -1.479412 | 0.071036  |
| 31 | 1  | 0 | -3.446845 | -0.599962 | -1.841100 |
| 32 | 1  | 0 | -2.333128 | -2.088347 | 2.025298  |
| 33 | 16 | 0 | -0.245874 | 2.078710  | 0.588212  |
| 34 | 8  | 0 | 0.112363  | 2.177222  | 2.065732  |
| 35 | 8  | 0 | -0.763001 | 3.285655  | -0.010233 |
| 36 | 6  | 0 | -3.919933 | -2.649313 | -0.106577 |
| 37 | 1  | 0 | -4.119467 | -2.842803 | -1.162006 |
| 38 | 1  | 0 | -3.504032 | -3.552118 | 0.345873  |
| 39 | 1  | 0 | -4.877619 | -2.446382 | 0.383876  |
| 40 | 5  | 0 | -0.775542 | 2.755914  | 3.228212  |
| 41 | 9  | 0 | -0.427448 | 4.085162  | 3.369980  |
| 42 | 9  | 0 | -2.107147 | 2.598435  | 2.872043  |
| 43 | 9  | 0 | -0.428297 | 1.997482  | 4.328843  |

---

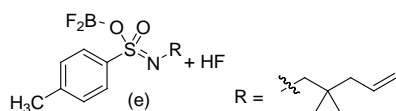

Zero-point correction= 0.341928 (Hartree/Particle)  
 Thermal correction to Energy= 0.366905  
 Thermal correction to Enthalpy= 0.367849  
 Thermal correction to Gibbs Free Energy= 0.284327  
 Sum of electronic and zero-point Energies= -1473.639328  
 Sum of electronic and thermal Energies= -1473.614351  
 Sum of electronic and thermal Enthalpies= -1473.613406  
 Sum of electronic and thermal Free Energies= -1473.696929

Input orientation:

| Center Number | Atomic Number | Atomic Type | Coordinates (Angstroms) |           |           |
|---------------|---------------|-------------|-------------------------|-----------|-----------|
|               |               |             | X                       | Y         | Z         |
| 1             | 6             | 0           | 3.021760                | -3.467763 | 1.561606  |
| 2             | 1             | 0           | 3.857380                | -3.018945 | 2.093919  |
| 3             | 1             | 0           | 2.424268                | -4.195469 | 2.102551  |
| 4             | 6             | 0           | 2.748249                | -3.141465 | 0.301709  |
| 5             | 1             | 0           | 1.901341                | -3.616426 | -0.190916 |
| 6             | 6             | 0           | 3.529662                | -2.151052 | -0.512222 |
| 7             | 1             | 0           | 4.433628                | -1.862372 | 0.036072  |
| 8             | 1             | 0           | 3.858157                | -2.635944 | -1.439391 |
| 9             | 6             | 0           | 2.758690                | -0.867995 | -0.911981 |
| 10            | 6             | 0           | 1.489388                | -1.218775 | -1.695558 |
| 11            | 1             | 0           | 0.766890                | -1.764484 | -1.081782 |
| 12            | 1             | 0           | 0.998987                | -0.314229 | -2.065303 |
| 13            | 1             | 0           | 1.737215                | -1.840201 | -2.562084 |
| 14            | 6             | 0           | 3.676462                | -0.005293 | -1.782457 |
| 15            | 1             | 0           | 3.183302                | 0.928474  | -2.065277 |
| 16            | 1             | 0           | 4.601070                | 0.246129  | -1.252224 |
| 17            | 1             | 0           | 3.946181                | -0.537668 | -2.700001 |
| 18            | 6             | 0           | 2.407632                | -0.117380 | 0.383433  |
| 19            | 1             | 0           | 1.809379                | -0.770320 | 1.024847  |
| 20            | 1             | 0           | 3.328959                | 0.110281  | 0.927876  |
| 21            | 7             | 0           | 1.739160                | 1.162912  | 0.115317  |
| 22            | 1             | 0           | -0.141065               | 4.269370  | 0.551648  |
| 23            | 6             | 0           | -0.844657               | 0.199543  | 0.502280  |
| 24            | 6             | 0           | -1.692390               | 0.204294  | -0.601326 |
| 25            | 6             | 0           | -0.850353               | -0.840042 | 1.424314  |



|    |    |   |           |           |           |
|----|----|---|-----------|-----------|-----------|
| 26 | 6  | 0 | -2.569178 | -0.853810 | -0.767722 |
| 27 | 1  | 0 | -1.674735 | 1.021416  | -1.312505 |
| 28 | 6  | 0 | -1.736643 | -1.892002 | 1.233461  |
| 29 | 1  | 0 | -0.188367 | -0.838275 | 2.281724  |
| 30 | 6  | 0 | -2.603522 | -1.917011 | 0.140732  |
| 31 | 1  | 0 | -3.243599 | -0.853804 | -1.617555 |
| 32 | 1  | 0 | -1.752836 | -2.703530 | 1.952733  |
| 33 | 16 | 0 | 0.364193  | 1.495271  | 0.590488  |
| 34 | 8  | 0 | 0.419895  | 1.734738  | 2.257870  |
| 35 | 8  | 0 | -0.198688 | 2.722957  | 0.030853  |
| 36 | 6  | 0 | -3.570207 | -3.049221 | -0.058359 |
| 37 | 1  | 0 | -3.426061 | -3.515870 | -1.036879 |
| 38 | 1  | 0 | -3.450930 | -3.814874 | 0.710048  |
| 39 | 1  | 0 | -4.600484 | -2.683484 | -0.020326 |
| 40 | 5  | 0 | -0.592456 | 2.190795  | 3.043860  |
| 41 | 9  | 0 | -0.133446 | 5.156522  | 0.873737  |
| 42 | 9  | 0 | -1.802478 | 2.467844  | 2.583163  |
| 43 | 9  | 0 | -0.353485 | 2.347993  | 4.335503  |

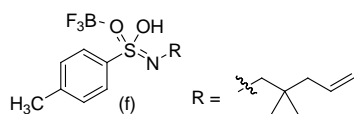

|                                              |                             |
|----------------------------------------------|-----------------------------|
| Zero-point correction=                       | 0.342388 (Hartree/Particle) |
| Thermal correction to Energy=                | 0.366752                    |
| Thermal correction to Enthalpy=              | 0.367696                    |
| Thermal correction to Gibbs Free Energy=     | 0.284826                    |
| Sum of electronic and zero-point Energies=   | -1473.658587                |
| Sum of electronic and thermal Energies=      | -1473.634223                |
| Sum of electronic and thermal Enthalpies=    | -1473.633279                |
| Sum of electronic and thermal Free Energies= | -1473.716148                |

Input orientation:

| Center Number | Atomic Number | Atomic Type | Coordinates (Angstroms) |           |          |
|---------------|---------------|-------------|-------------------------|-----------|----------|
|               |               |             | X                       | Y         | Z        |
| 1             | 6             | 0           | -4.805528               | 0.258881  | 2.517350 |
| 2             | 1             | 0           | -5.654513               | -0.368467 | 2.254808 |
| 3             | 1             | 0           | -4.624788               | 0.430229  | 3.574078 |
| 4             | 6             | 0           | -4.021446               | 0.789972  | 1.584035 |
| 5             | 1             | 0           | -3.180770               | 1.408401  | 1.893594 |
| 6             | 6             | 0           | -4.210085               | 0.602625  | 0.106577 |

|    |    |   |           |           |           |
|----|----|---|-----------|-----------|-----------|
| 7  | 1  | 0 | -5.146440 | 0.061979  | -0.073079 |
| 8  | 1  | 0 | -4.313794 | 1.587418  | -0.365365 |
| 9  | 6  | 0 | -3.060901 | -0.134856 | -0.623379 |
| 10 | 6  | 0 | -1.730020 | 0.602109  | -0.443080 |
| 11 | 1  | 0 | -1.396315 | 0.589163  | 0.598139  |
| 12 | 1  | 0 | -0.945806 | 0.136827  | -1.046957 |
| 13 | 1  | 0 | -1.823762 | 1.645584  | -0.759917 |
| 14 | 6  | 0 | -3.410942 | -0.213843 | -2.111826 |
| 15 | 1  | 0 | -2.639992 | -0.753181 | -2.669080 |
| 16 | 1  | 0 | -4.365107 | -0.728707 | -2.265806 |
| 17 | 1  | 0 | -3.495754 | 0.790005  | -2.539703 |
| 18 | 6  | 0 | -2.961734 | -1.547804 | -0.030331 |
| 19 | 1  | 0 | -2.755555 | -1.475041 | 1.040448  |
| 20 | 1  | 0 | -3.916291 | -2.068691 | -0.154646 |
| 21 | 7  | 0 | -1.926301 | -2.322622 | -0.726515 |
| 22 | 6  | 0 | 0.276827  | -3.678468 | -1.275145 |
| 23 | 6  | 0 | 0.288613  | -3.035135 | -2.503841 |
| 24 | 6  | 0 | 1.221277  | -4.641441 | -0.928058 |
| 25 | 6  | 0 | 1.275492  | -3.380645 | -3.416230 |
| 26 | 1  | 0 | -0.458274 | -2.288105 | -2.740187 |
| 27 | 6  | 0 | 2.194077  | -4.965751 | -1.855662 |
| 28 | 1  | 0 | 1.197213  | -5.129468 | 0.038560  |
| 29 | 6  | 0 | 2.236939  | -4.344018 | -3.109652 |
| 30 | 1  | 0 | 1.295212  | -2.889166 | -4.382399 |
| 31 | 1  | 0 | 2.935731  | -5.715858 | -1.603598 |
| 32 | 16 | 0 | -0.932606 | -3.221562 | -0.093829 |
| 33 | 8  | 0 | -0.140567 | -2.728798 | 1.136020  |
| 34 | 8  | 0 | -1.439555 | -4.682383 | 0.383806  |
| 35 | 6  | 0 | 3.307803  | -4.713966 | -4.094500 |
| 36 | 1  | 0 | 3.304824  | -5.791532 | -4.280149 |
| 37 | 1  | 0 | 3.171737  | -4.198098 | -5.046112 |
| 38 | 1  | 0 | 4.294817  | -4.454767 | -3.700301 |
| 39 | 5  | 0 | -0.627699 | -2.620899 | 2.602280  |
| 40 | 9  | 0 | -0.832862 | -1.287916 | 2.883296  |
| 41 | 9  | 0 | 0.361062  | -3.183842 | 3.378030  |
| 42 | 9  | 0 | -1.834295 | -3.352047 | 2.691655  |
| 43 | 1  | 0 | -1.840586 | -4.618082 | 1.272649  |

---

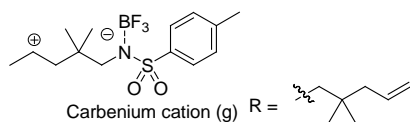

|                                              |                             |
|----------------------------------------------|-----------------------------|
| Zero-point correction=                       | 0.340864 (Hartree/Particle) |
| Thermal correction to Energy=                | 0.364903                    |
| Thermal correction to Enthalpy=              | 0.365847                    |
| Thermal correction to Gibbs Free Energy=     | 0.285197                    |
| Sum of electronic and zero-point Energies=   | -1473.659760                |
| Sum of electronic and thermal Energies=      | -1473.635721                |
| Sum of electronic and thermal Enthalpies=    | -1473.634777                |
| Sum of electronic and thermal Free Energies= | -1473.715426                |

### Cartesian Coordinates

| Center Number | Atomic Number | Atomic Type | Coordinates (Angstroms) |           |           |
|---------------|---------------|-------------|-------------------------|-----------|-----------|
|               |               |             | X                       | Y         | Z         |
| 1             | 6             | 0           | -4.604888               | -0.744623 | 5.092831  |
| 2             | 1             | 0           | -5.100347               | -1.433188 | 4.410719  |
| 3             | 1             | 0           | -3.824004               | -1.199979 | 5.704836  |
| 4             | 6             | 0           | -4.190476               | 0.495238  | 4.495124  |
| 5             | 1             | 0           | -3.516745               | 1.125278  | 5.076444  |
| 6             | 6             | 0           | -4.574989               | 0.936923  | 3.194806  |
| 7             | 1             | 0           | -3.666246               | 0.486235  | 2.697408  |
| 8             | 1             | 0           | -5.418636               | 0.366831  | 2.794974  |
| 9             | 6             | 0           | -4.618573               | 2.446334  | 2.876020  |
| 10            | 6             | 0           | -3.341756               | 3.151941  | 3.328954  |
| 11            | 1             | 0           | -2.449066               | 2.685070  | 2.904171  |
| 12            | 1             | 0           | -3.365124               | 4.191203  | 2.999370  |
| 13            | 1             | 0           | -3.249746               | 3.157584  | 4.418966  |
| 14            | 6             | 0           | -5.822396               | 3.040932  | 3.614262  |
| 15            | 1             | 0           | -5.910674               | 4.109023  | 3.403035  |
| 16            | 1             | 0           | -6.756763               | 2.560168  | 3.317988  |
| 17            | 1             | 0           | -5.692845               | 2.925632  | 4.696032  |
| 18            | 6             | 0           | -4.783087               | 2.513713  | 1.335454  |
| 19            | 1             | 0           | -3.905791               | 2.047405  | 0.878408  |
| 20            | 1             | 0           | -5.652195               | 1.913882  | 1.054554  |
| 21            | 7             | 0           | -4.898349               | 3.860203  | 0.773966  |
| 22            | 6             | 0           | -6.602336               | 4.593290  | -1.272779 |
| 23            | 6             | 0           | -6.541722               | 5.834639  | -1.886939 |
| 24            | 6             | 0           | -6.803443               | 3.434940  | -2.015626 |
| 25            | 6             | 0           | -6.687214               | 5.913927  | -3.266512 |

|    |    |   |           |           |           |
|----|----|---|-----------|-----------|-----------|
| 26 | 1  | 0 | -6.375301 | 6.725442  | -1.295021 |
| 27 | 6  | 0 | -6.945475 | 3.529862  | -3.391073 |
| 28 | 1  | 0 | -6.844515 | 2.468684  | -1.526301 |
| 29 | 6  | 0 | -6.890749 | 4.768762  | -4.036878 |
| 30 | 1  | 0 | -6.635855 | 6.883374  | -3.751214 |
| 31 | 1  | 0 | -7.099806 | 2.627720  | -3.974412 |
| 32 | 16 | 0 | -6.411145 | 4.453076  | 0.497306  |
| 33 | 8  | 0 | -7.377781 | 3.451668  | 0.948123  |
| 34 | 8  | 0 | -6.530099 | 5.795161  | 1.052645  |
| 35 | 6  | 0 | -7.074447 | 4.863430  | -5.526218 |
| 36 | 1  | 0 | -6.596759 | 5.758853  | -5.929307 |
| 37 | 1  | 0 | -6.658184 | 3.989078  | -6.031834 |
| 38 | 1  | 0 | -8.139516 | 4.913394  | -5.776451 |
| 39 | 5  | 0 | -3.708316 | 4.370625  | -0.074134 |
| 40 | 9  | 0 | -2.502115 | 4.187240  | 0.639031  |
| 41 | 9  | 0 | -3.592064 | 3.630582  | -1.285664 |
| 42 | 9  | 0 | -3.862939 | 5.732555  | -0.386686 |
| 43 | 1  | 0 | -5.357912 | -0.377773 | 5.825270  |

---

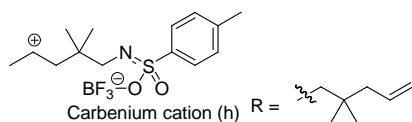

Zero-point correction= 0.341243 (Hartree/Particle)  
 Thermal correction to Energy= 0.365354  
 Thermal correction to Enthalpy= 0.366298  
 Thermal correction to Gibbs Free Energy= 0.285894  
 Sum of electronic and zero-point Energies= -1473.636150  
 Sum of electronic and thermal Energies= -1473.612039  
 Sum of electronic and thermal Enthalpies= -1473.611094  
 Sum of electronic and thermal Free Energies= -1473.691499

Input orientation:

| Center<br>Number | Atomic<br>Number | Atomic<br>Type | Coordinates (Angstroms) |           |           |
|------------------|------------------|----------------|-------------------------|-----------|-----------|
|                  |                  |                | X                       | Y         | Z         |
| 1                | 6                | 0              | 2.668786                | -2.518125 | 2.009796  |
| 2                | 1                | 0              | 3.388773                | -1.791425 | 2.380717  |
| 3                | 1                | 0              | 1.757554                | -2.598273 | 2.608752  |
| 4                | 6                | 0              | 2.386994                | -2.420049 | 0.606538  |
| 5                | 1                | 0              | 1.533655                | -2.986936 | 0.233824  |
| 6                | 6                | 0              | 3.143963                | -1.659941 | -0.344461 |
| 7                | 1                | 0              | 4.063232                | -1.260456 | 0.083123  |
| 8                | 1                | 0              | 3.340619                | -2.293582 | -1.218218 |
| 9                | 6                | 0              | 2.258322                | -0.454060 | -0.918222 |
| 10               | 6                | 0              | 1.046028                | -0.979064 | -1.685349 |
| 11               | 1                | 0              | 0.320132                | -1.473527 | -1.033407 |
| 12               | 1                | 0              | 0.538295                | -0.140453 | -2.165721 |
| 13               | 1                | 0              | 1.351833                | -1.682654 | -2.464780 |
| 14               | 6                | 0              | 3.179053                | 0.331423  | -1.849736 |
| 15               | 1                | 0              | 2.643398                | 1.201661  | -2.234208 |
| 16               | 1                | 0              | 4.070407                | 0.684882  | -1.324198 |
| 17               | 1                | 0              | 3.493581                | -0.283412 | -2.697486 |
| 18               | 6                | 0              | 1.831119                | 0.399635  | 0.291718  |
| 19               | 1                | 0              | 1.208575                | -0.229055 | 0.947454  |
| 20               | 1                | 0              | 2.724097                | 0.663035  | 0.872606  |
| 21               | 7                | 0              | 1.150934                | 1.609415  | -0.138379 |
| 22               | 6                | 0              | -1.372327               | 0.694689  | 0.423526  |
| 23               | 6                | 0              | -2.101575               | 0.608032  | -0.757120 |
| 24               | 6                | 0              | -1.498864               | -0.275999 | 1.409899  |

|    |    |   |           |           |           |
|----|----|---|-----------|-----------|-----------|
| 25 | 6  | 0 | -2.972443 | -0.455938 | -0.941100 |
| 26 | 1  | 0 | -1.994968 | 1.365014  | -1.525839 |
| 27 | 6  | 0 | -2.373085 | -1.336840 | 1.208838  |
| 28 | 1  | 0 | -0.939415 | -0.199055 | 2.333907  |
| 29 | 6  | 0 | -3.123317 | -1.442695 | 0.036763  |
| 30 | 1  | 0 | -3.546880 | -0.519273 | -1.859593 |
| 31 | 1  | 0 | -2.479646 | -2.089958 | 1.983273  |
| 32 | 16 | 0 | -0.157462 | 2.003813  | 0.546198  |
| 33 | 8  | 0 | 0.085464  | 2.081614  | 2.094184  |
| 34 | 8  | 0 | -0.727406 | 3.229722  | 0.011397  |
| 35 | 6  | 0 | -4.096905 | -2.573187 | -0.150442 |
| 36 | 1  | 0 | -4.291904 | -2.759158 | -1.208607 |
| 37 | 1  | 0 | -3.725531 | -3.495017 | 0.303313  |
| 38 | 1  | 0 | -5.052876 | -2.334454 | 0.326951  |
| 39 | 5  | 0 | -0.794388 | 2.684413  | 3.155227  |
| 40 | 9  | 0 | -0.477438 | 4.038759  | 3.304653  |
| 41 | 9  | 0 | -2.148913 | 2.535555  | 2.831429  |
| 42 | 9  | 0 | -0.493052 | 1.984426  | 4.332937  |
| 43 | 1  | 0 | 3.120752  | -3.532786 | 2.079453  |

---

## 2. Mechanism Studies

NMR spectra of substrate **1e** before and after the addition of  $\text{BF}_3$ .

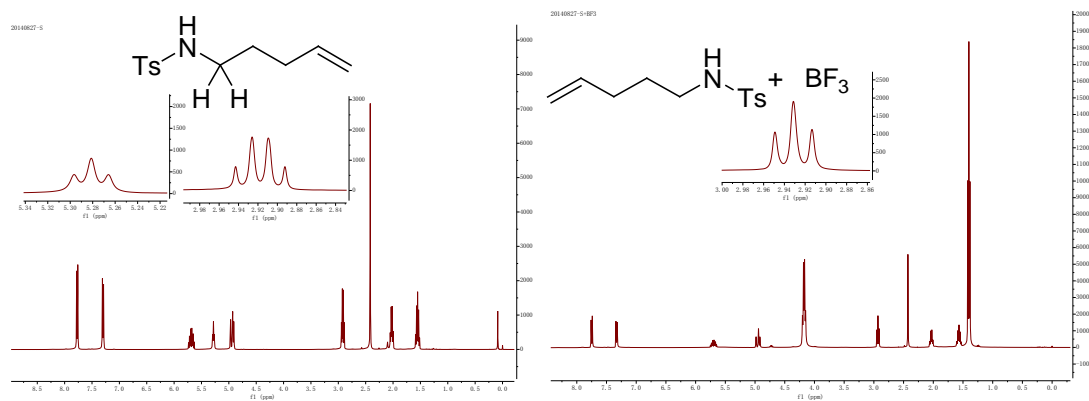

NMR spectra of substrate N-methyl p-toluenesulfonamide before and after the addition of  $\text{BF}_3$ .

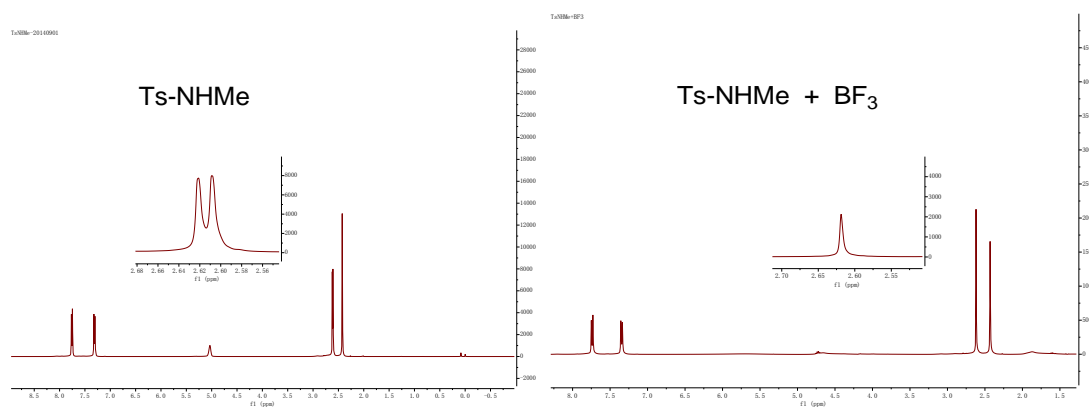

$^{19}\text{F}$  NMR spectra of  $\text{HBF}_4$  and a mixture N-methyl p-toluenesulfonamide  $\text{BF}_3$ .

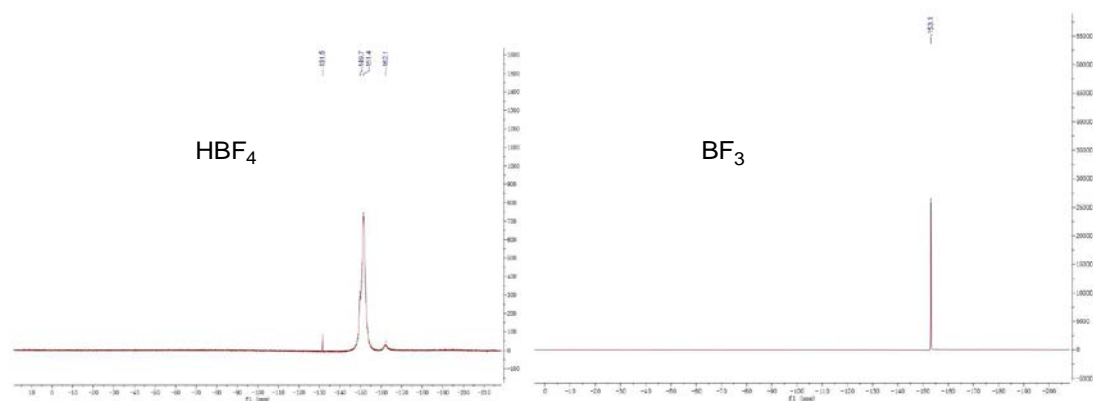

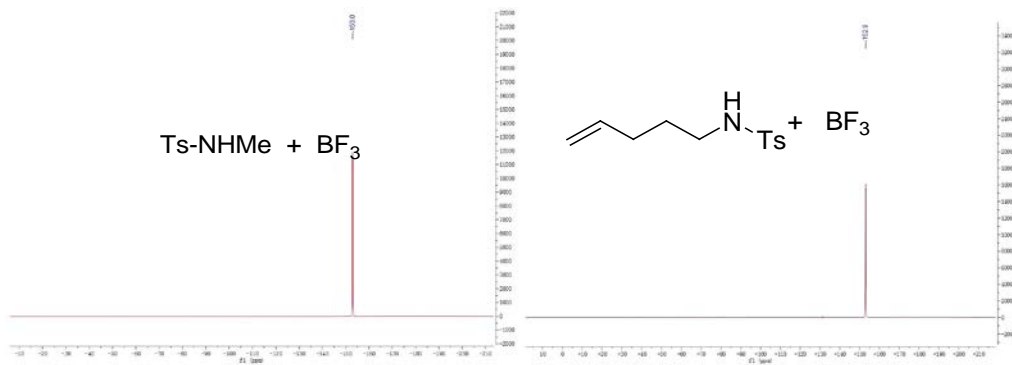

### 3. Copies of NMR Spectra

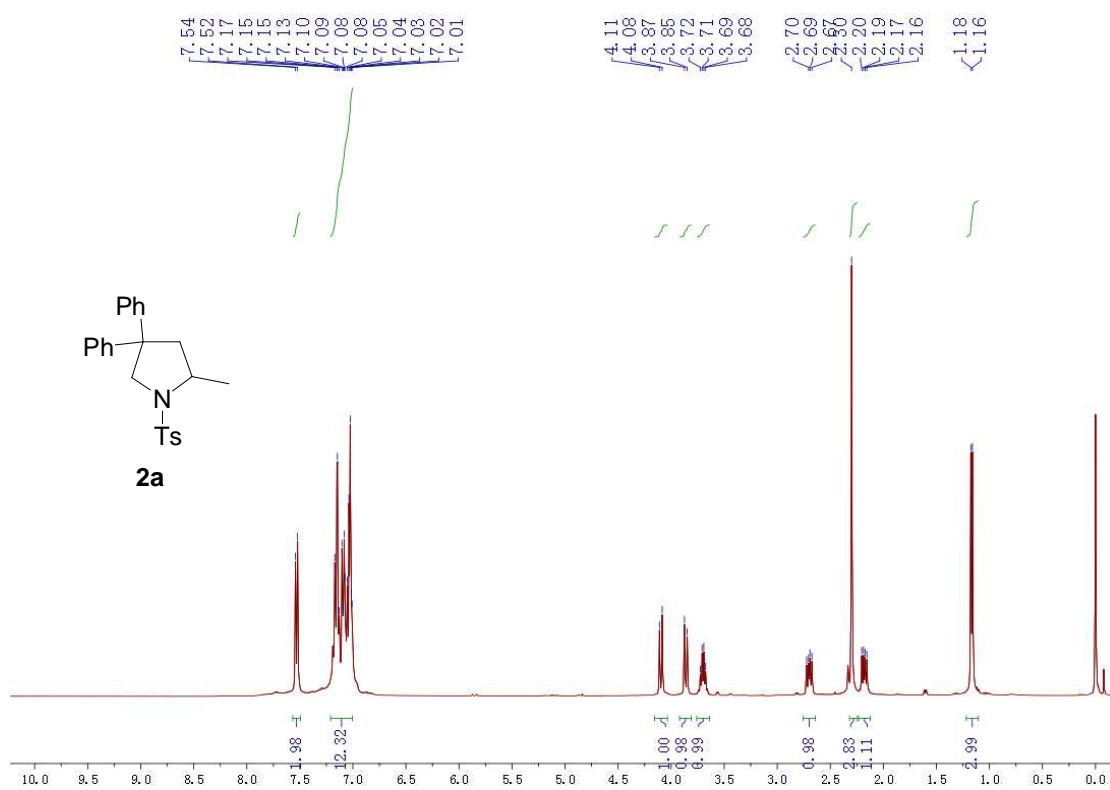



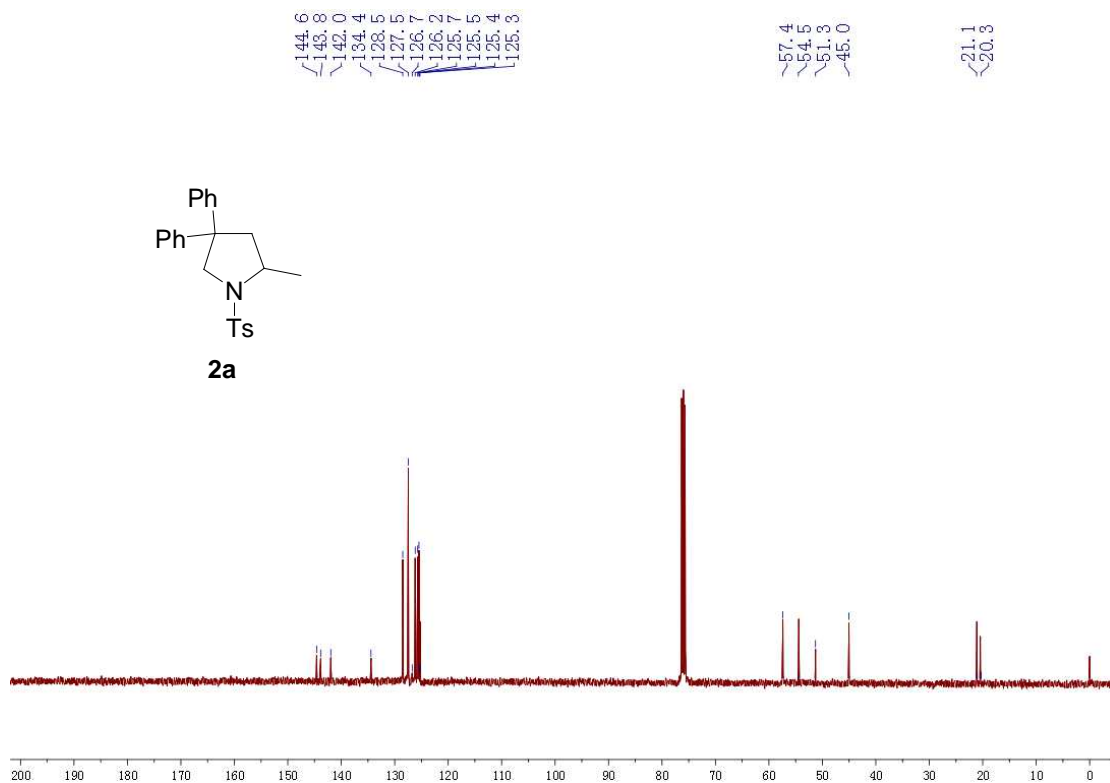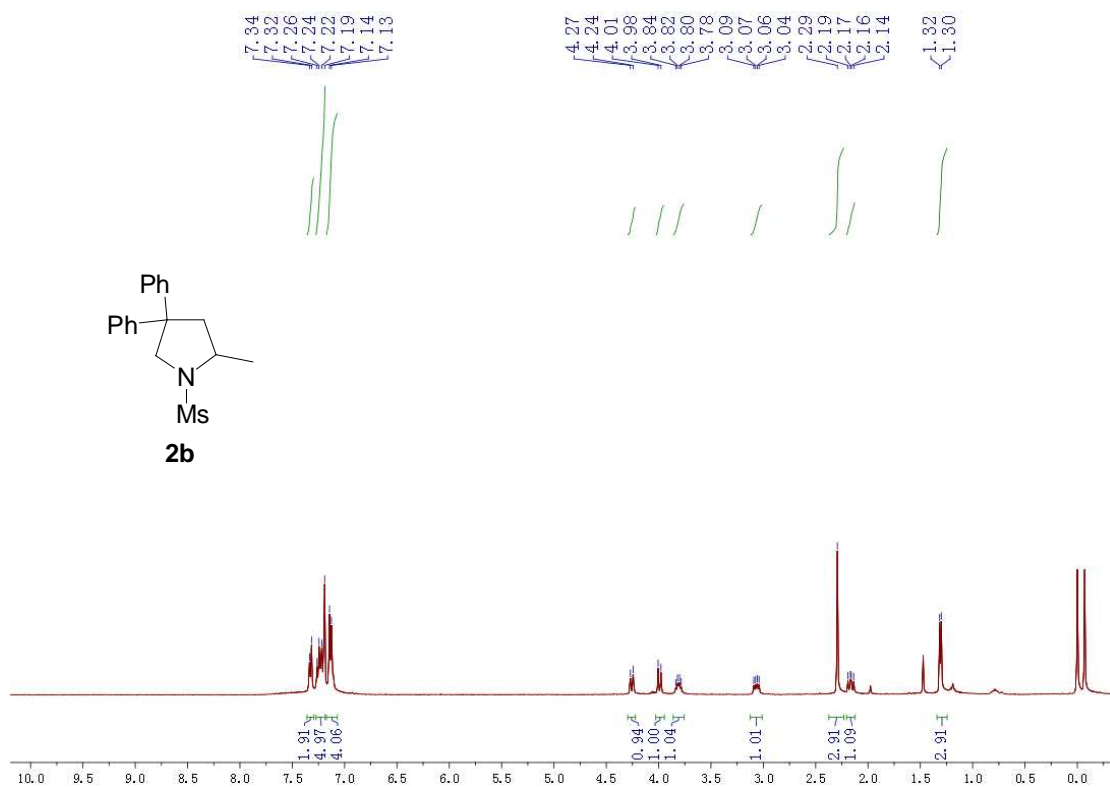

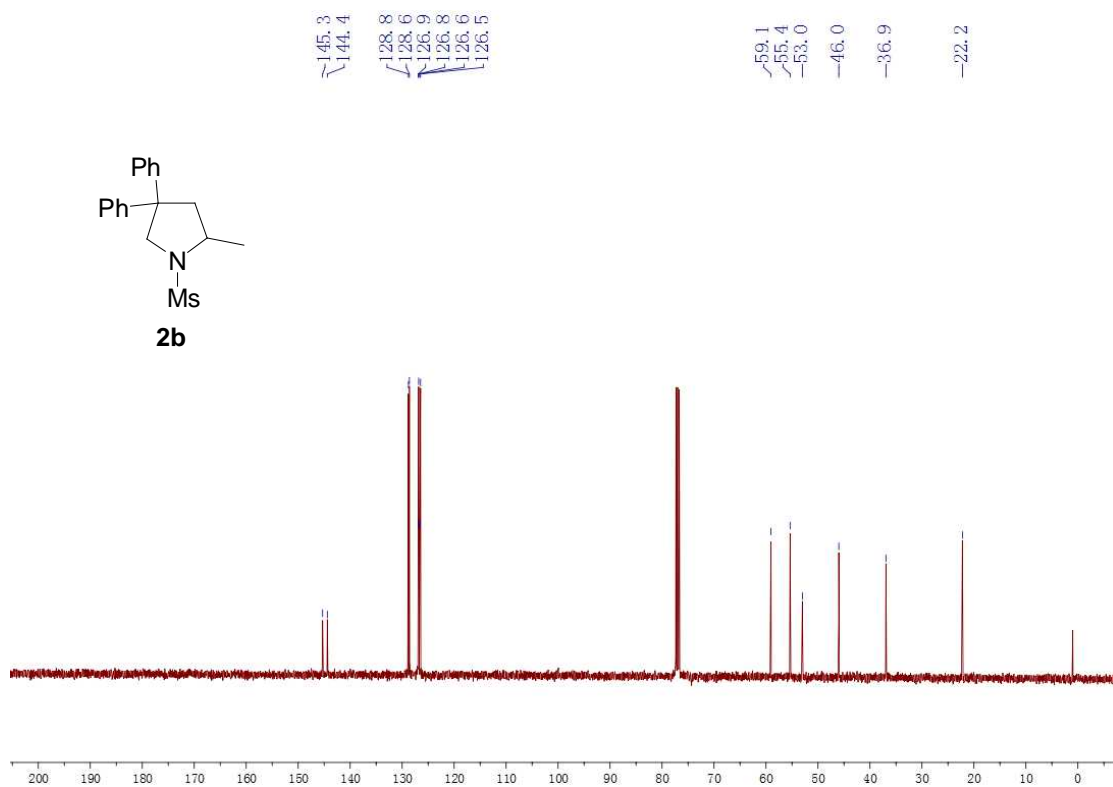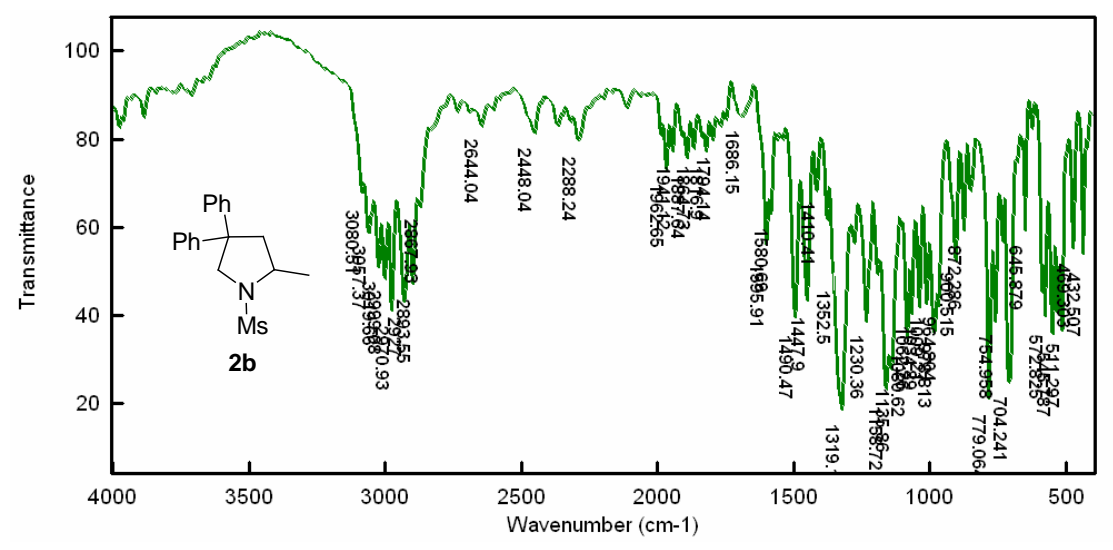

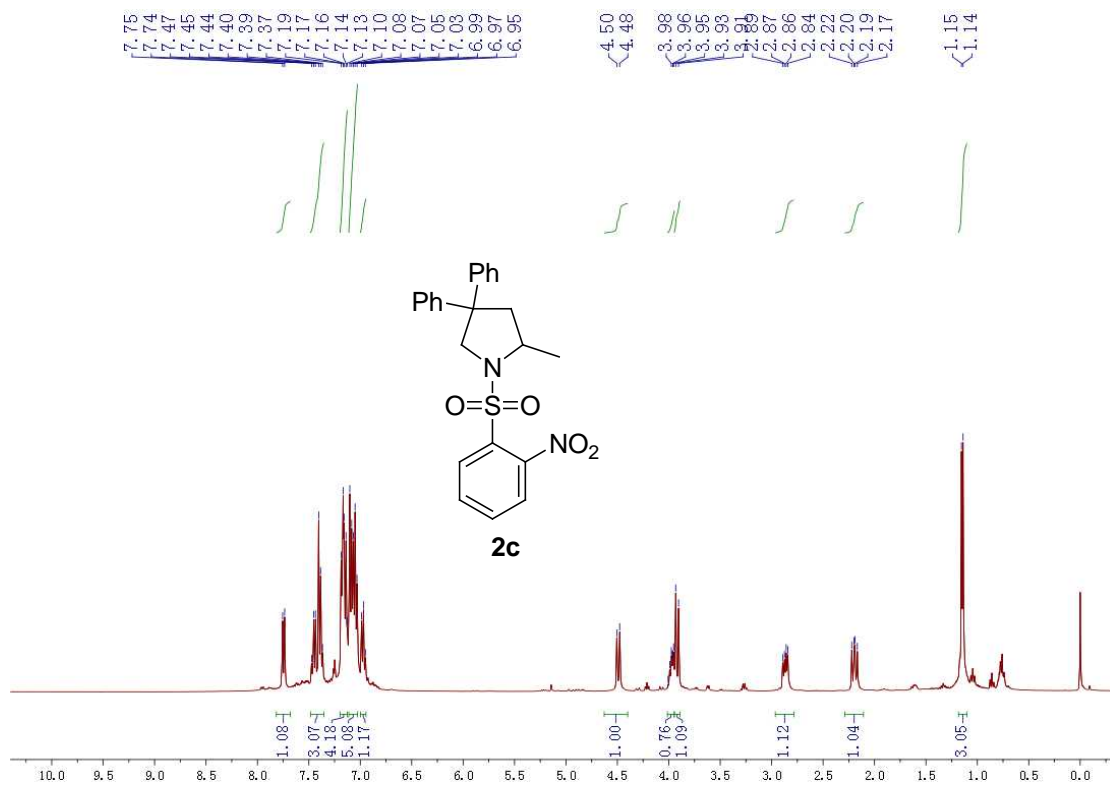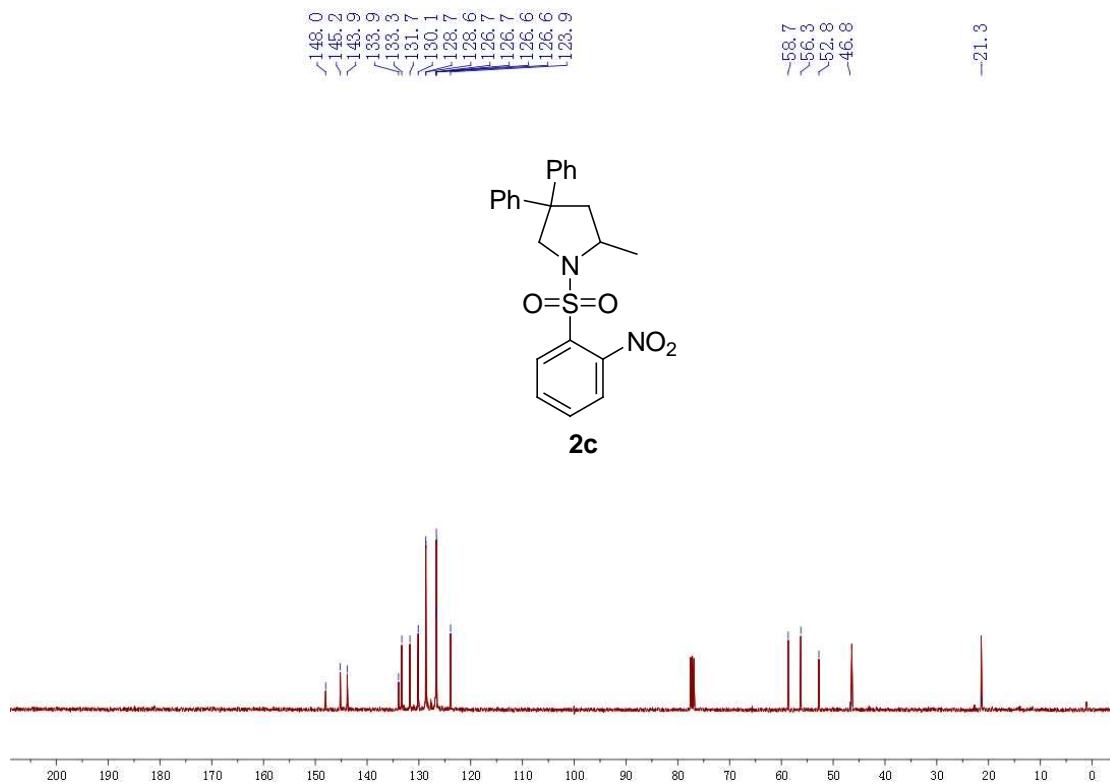

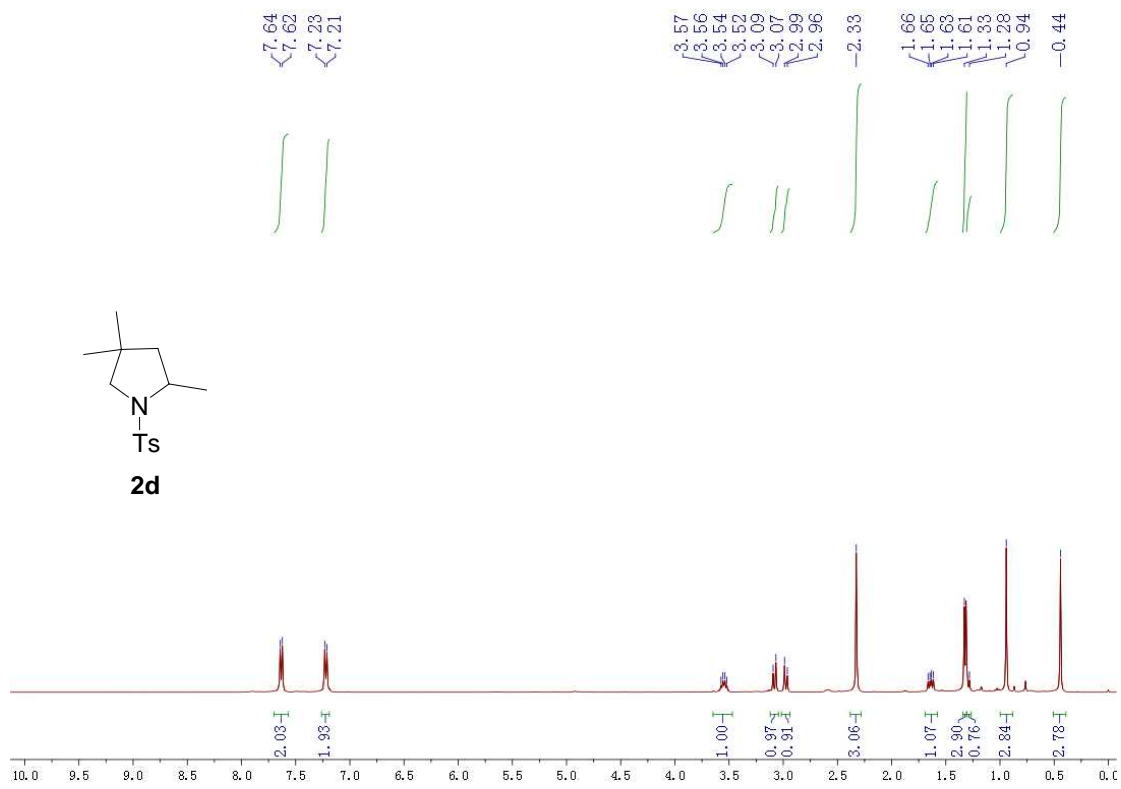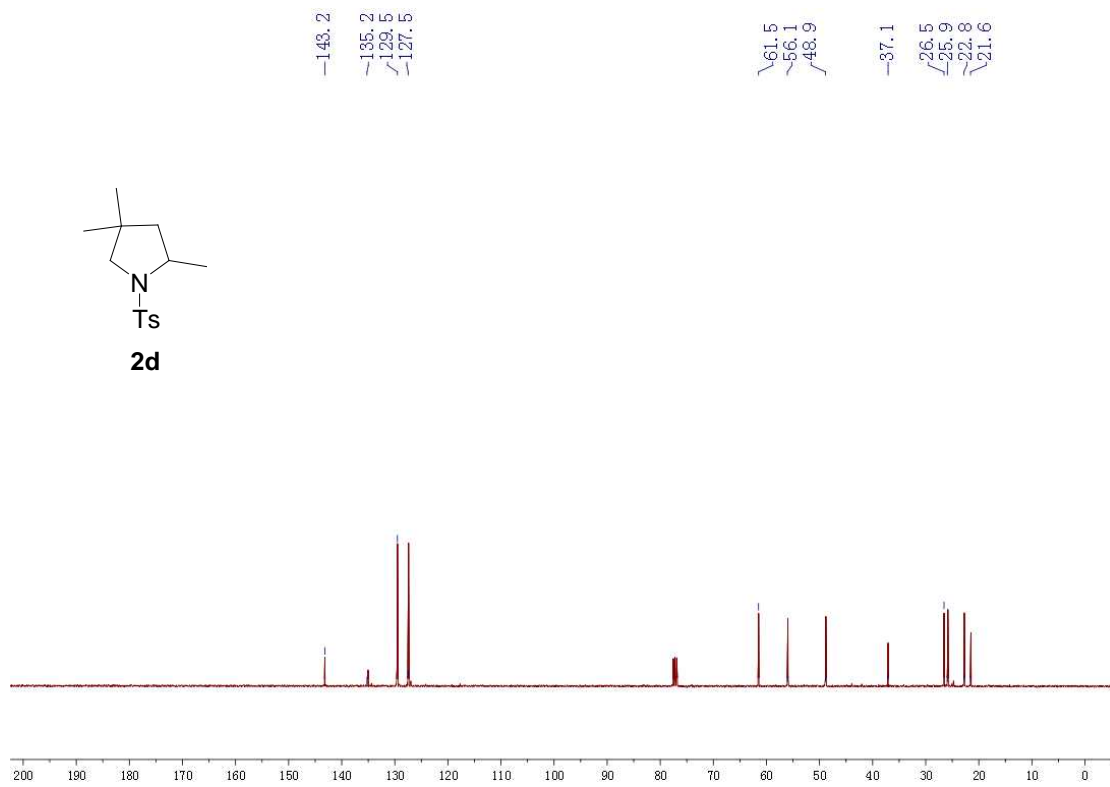

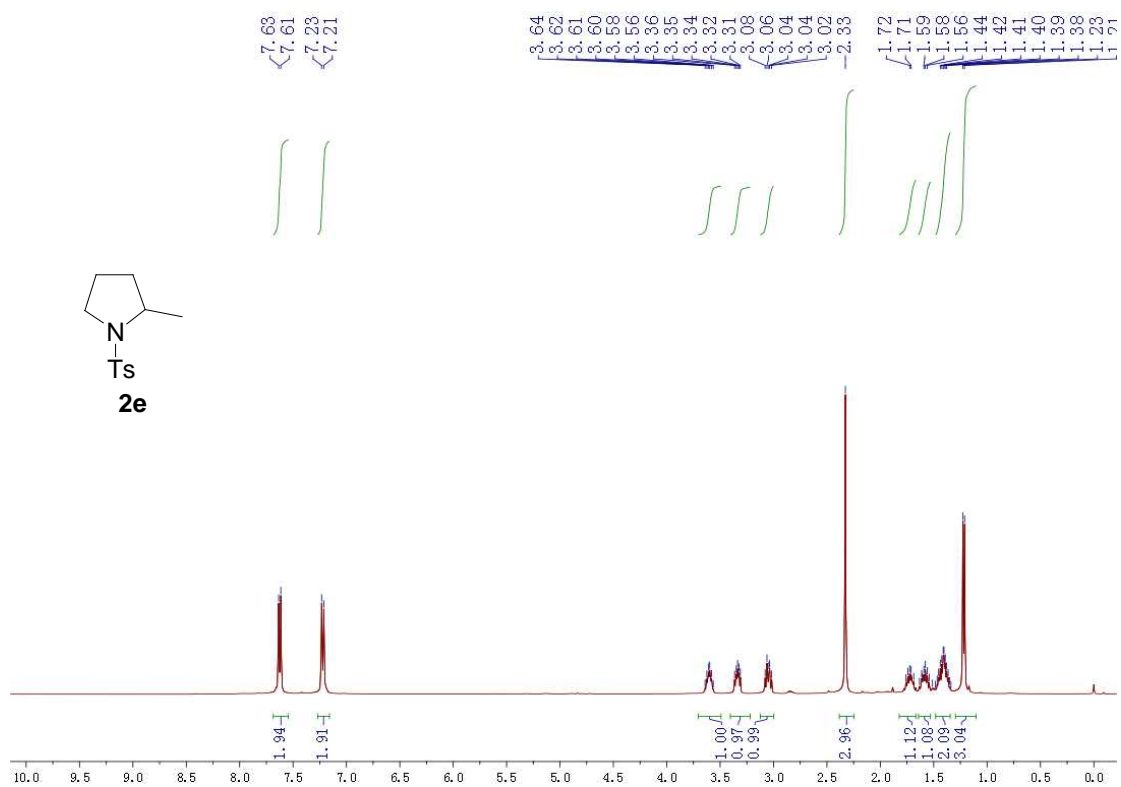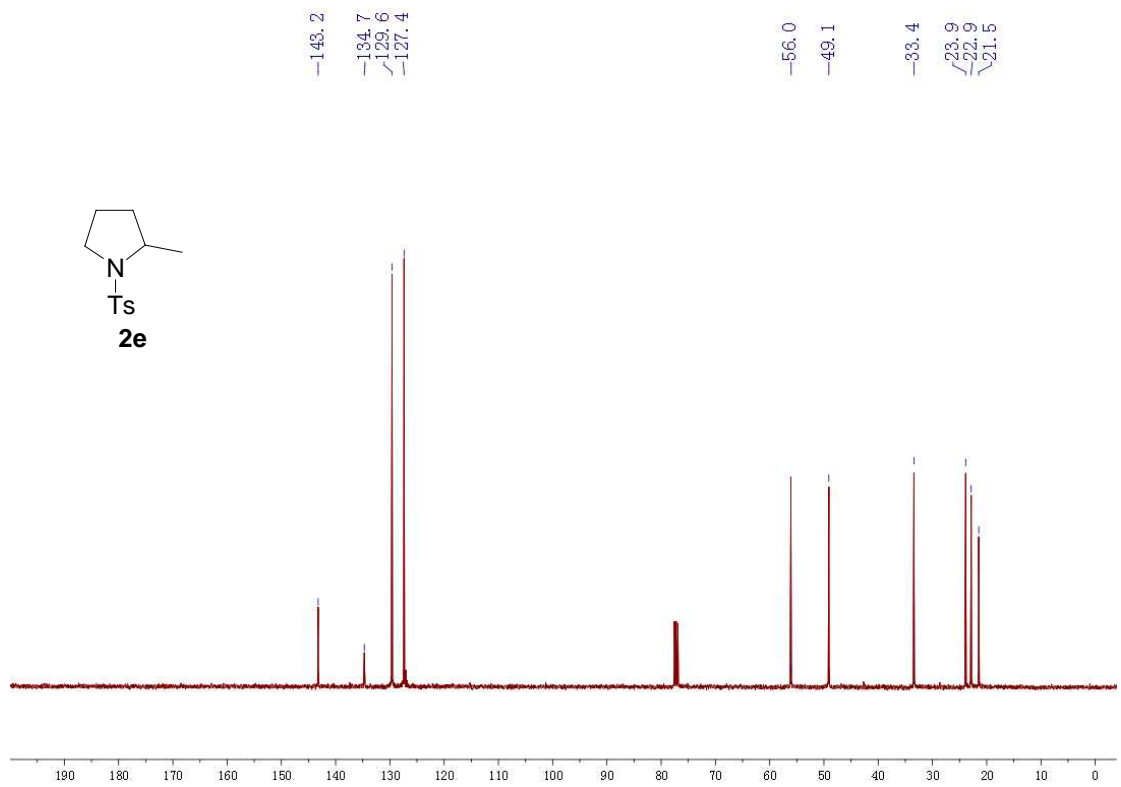

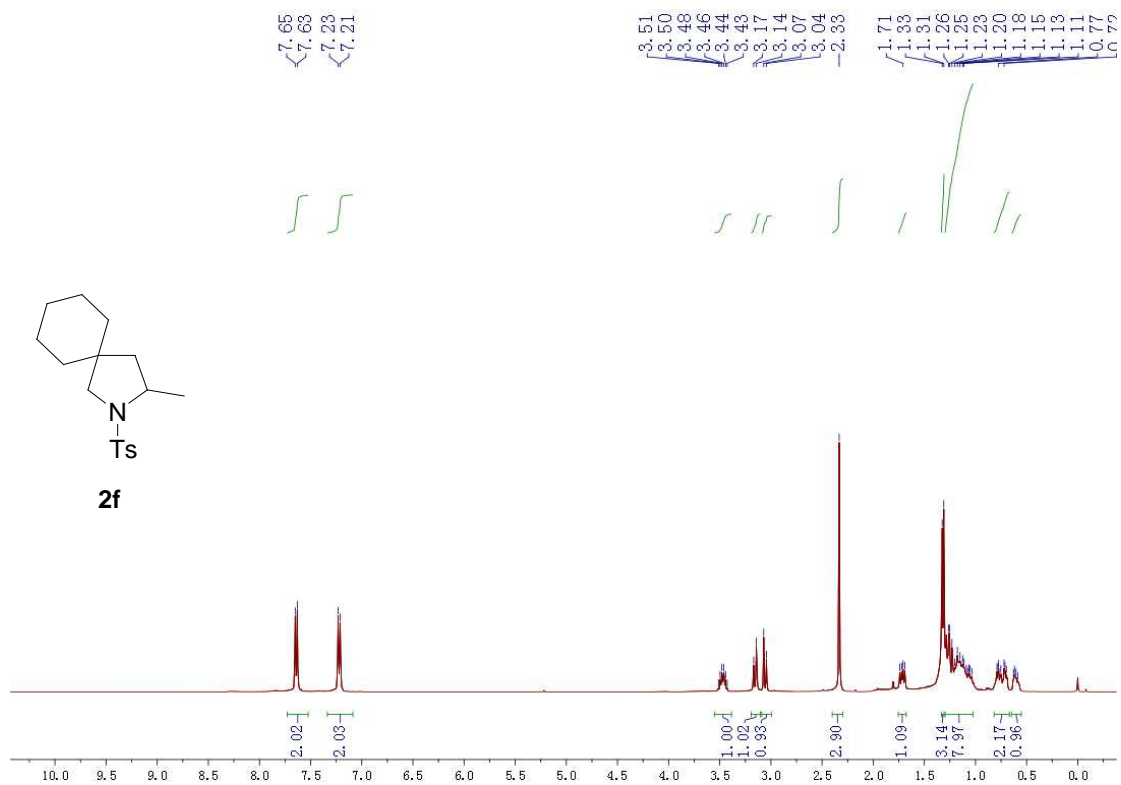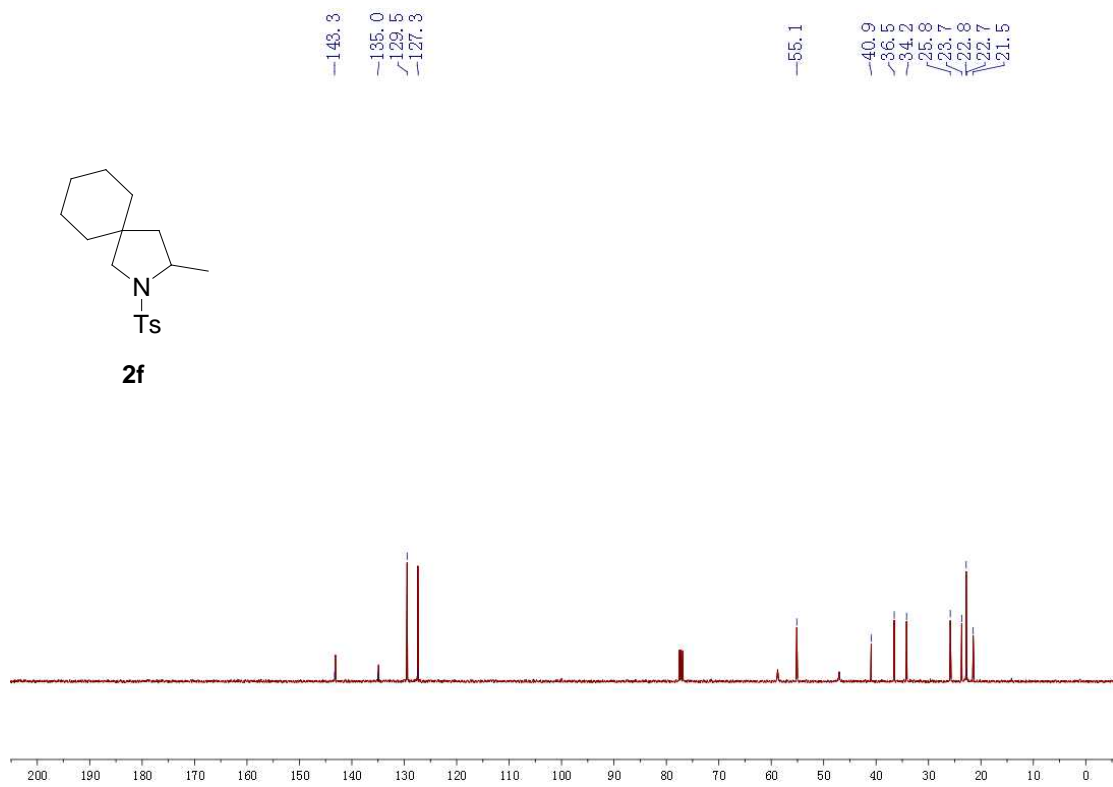

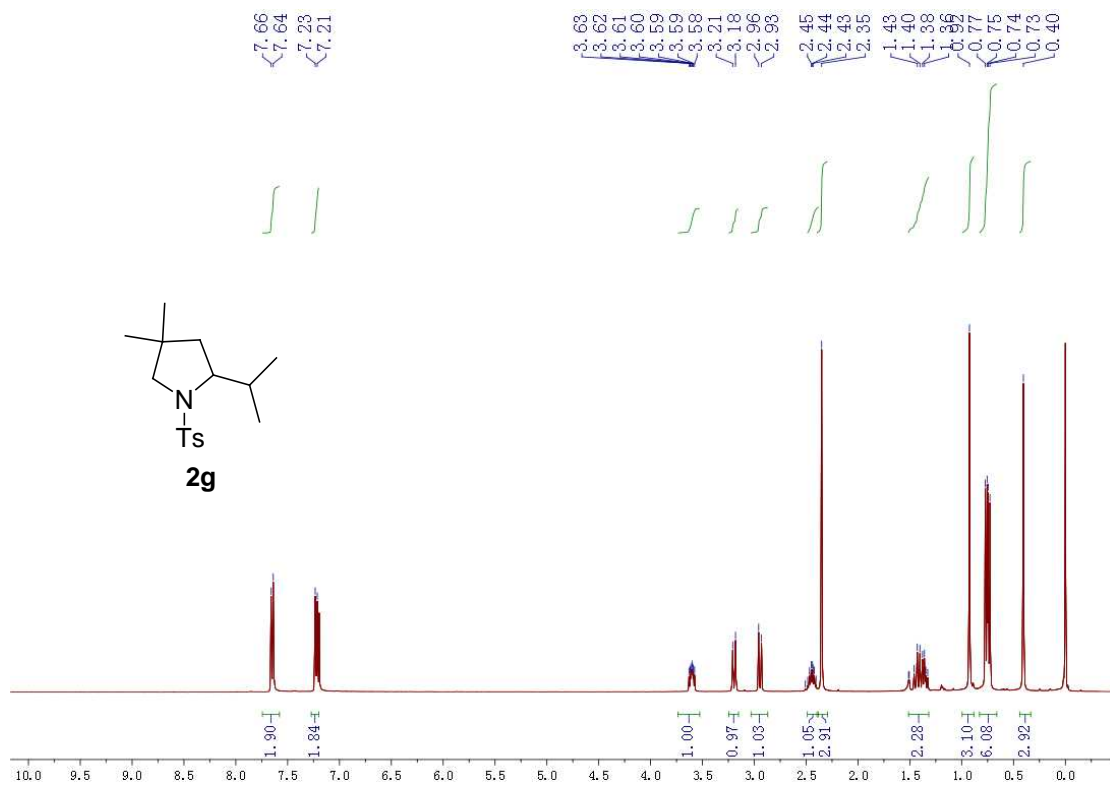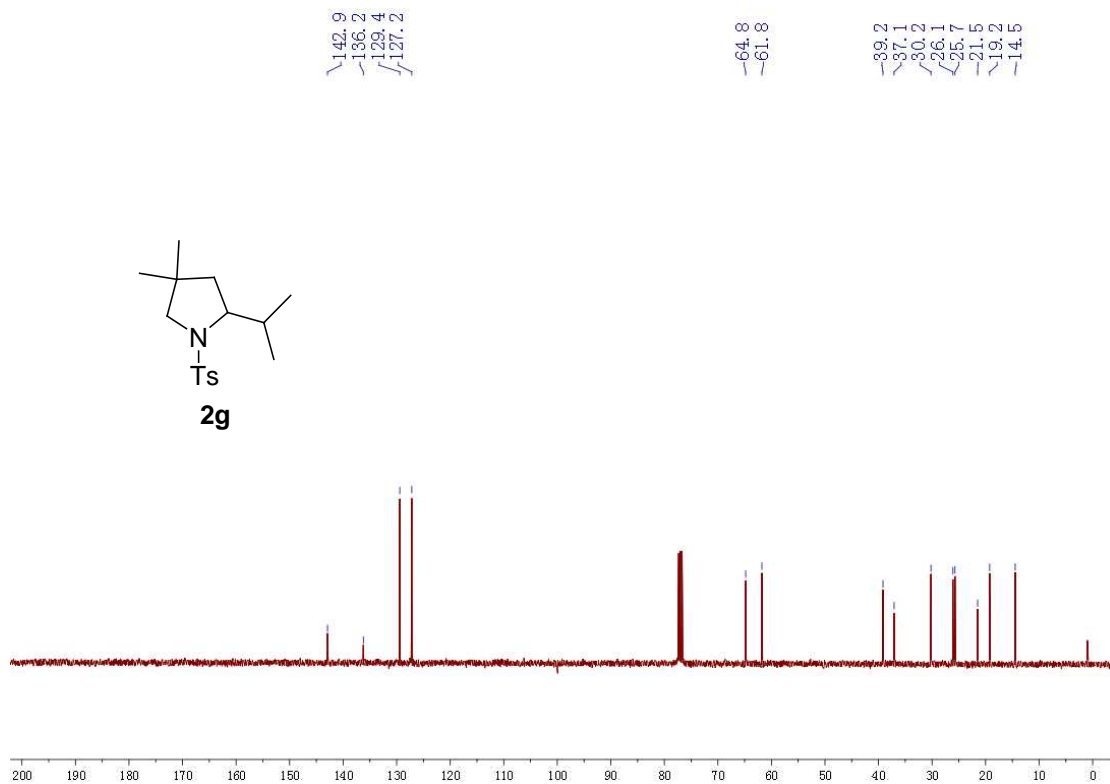

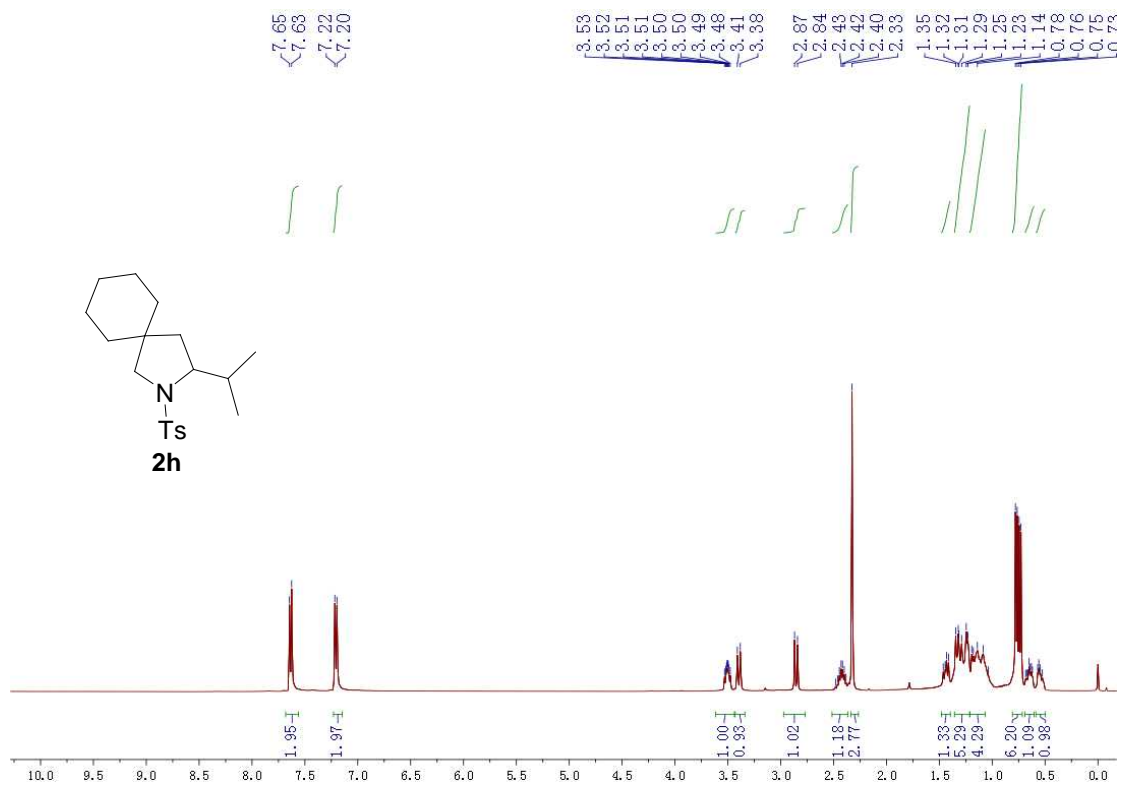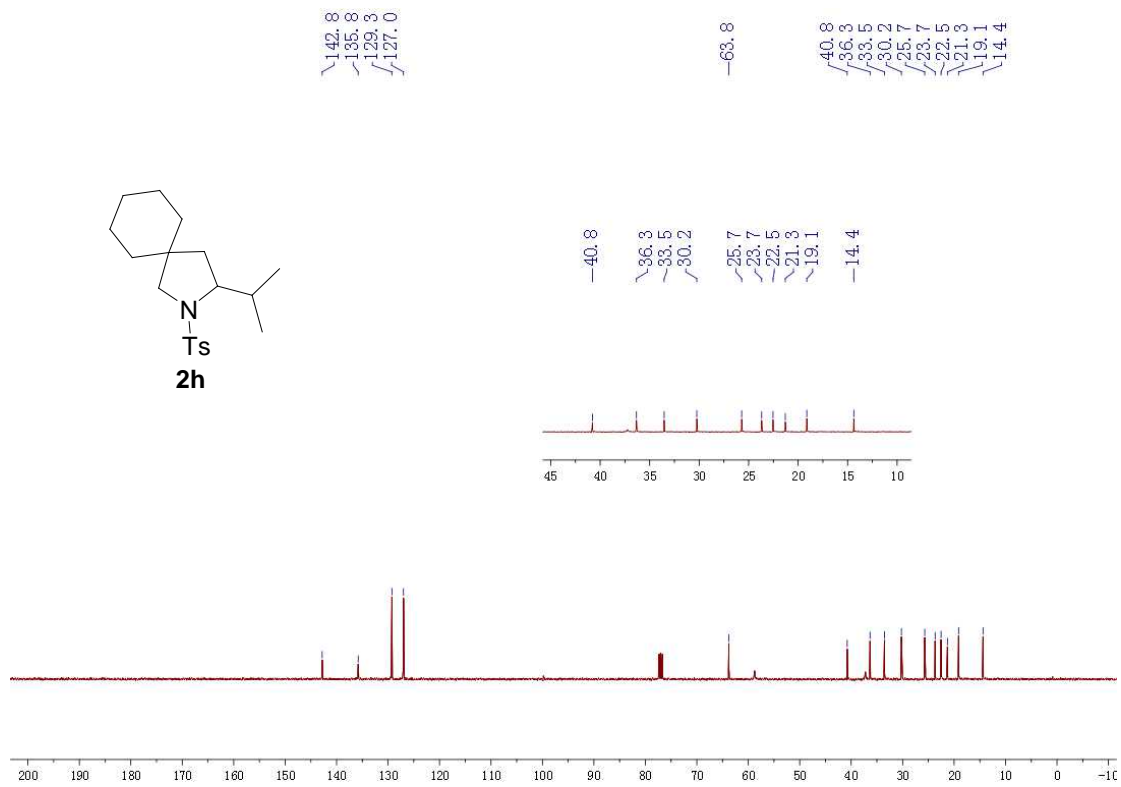





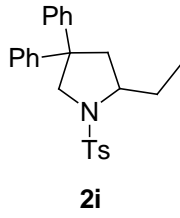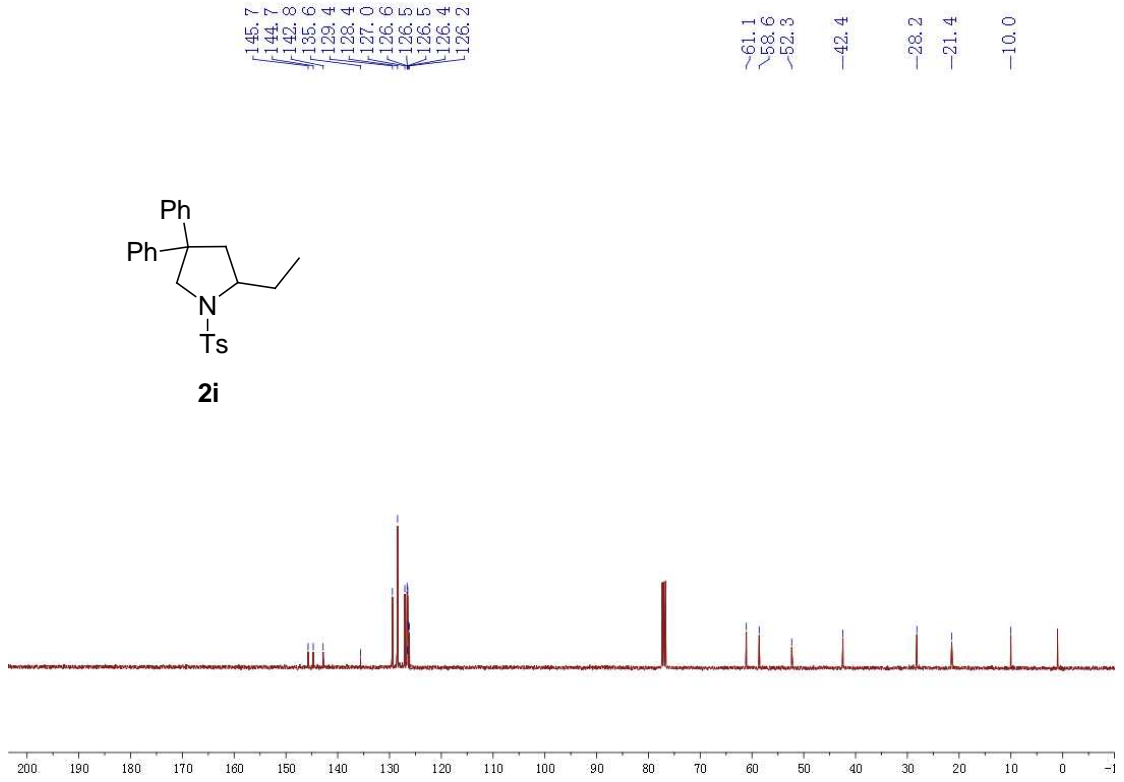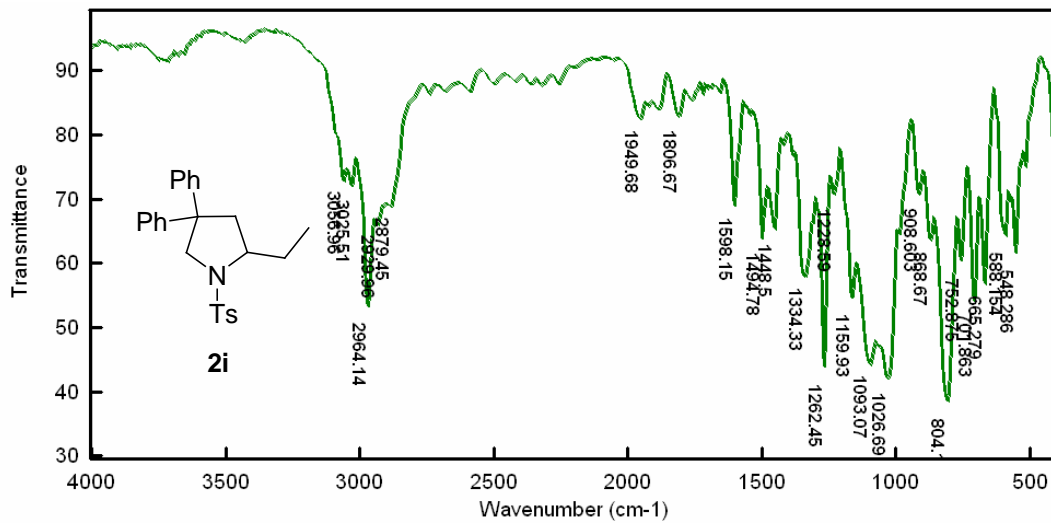

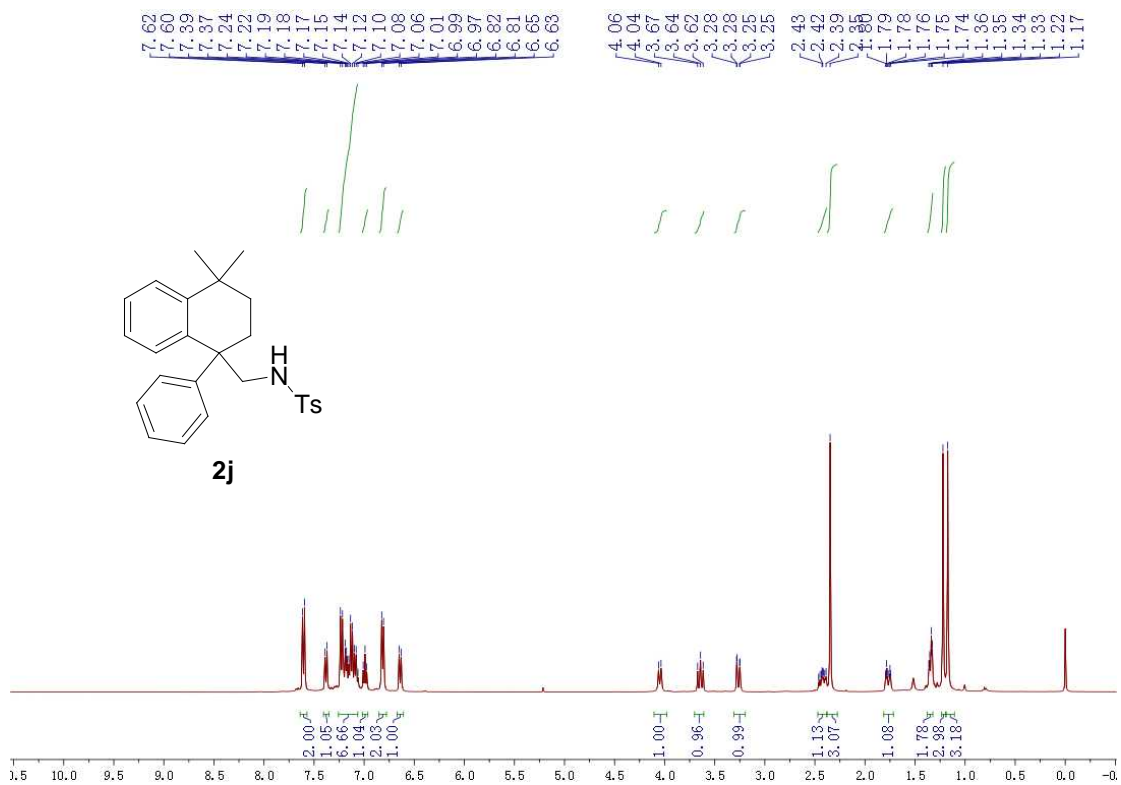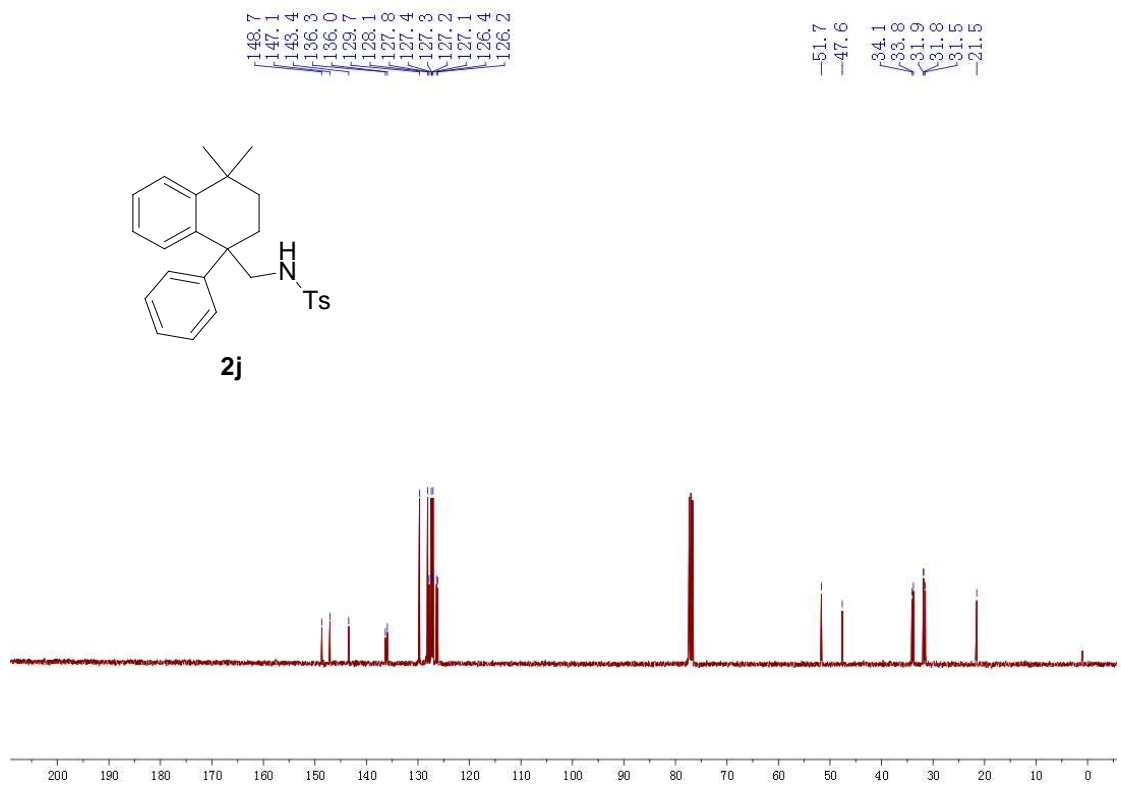



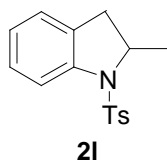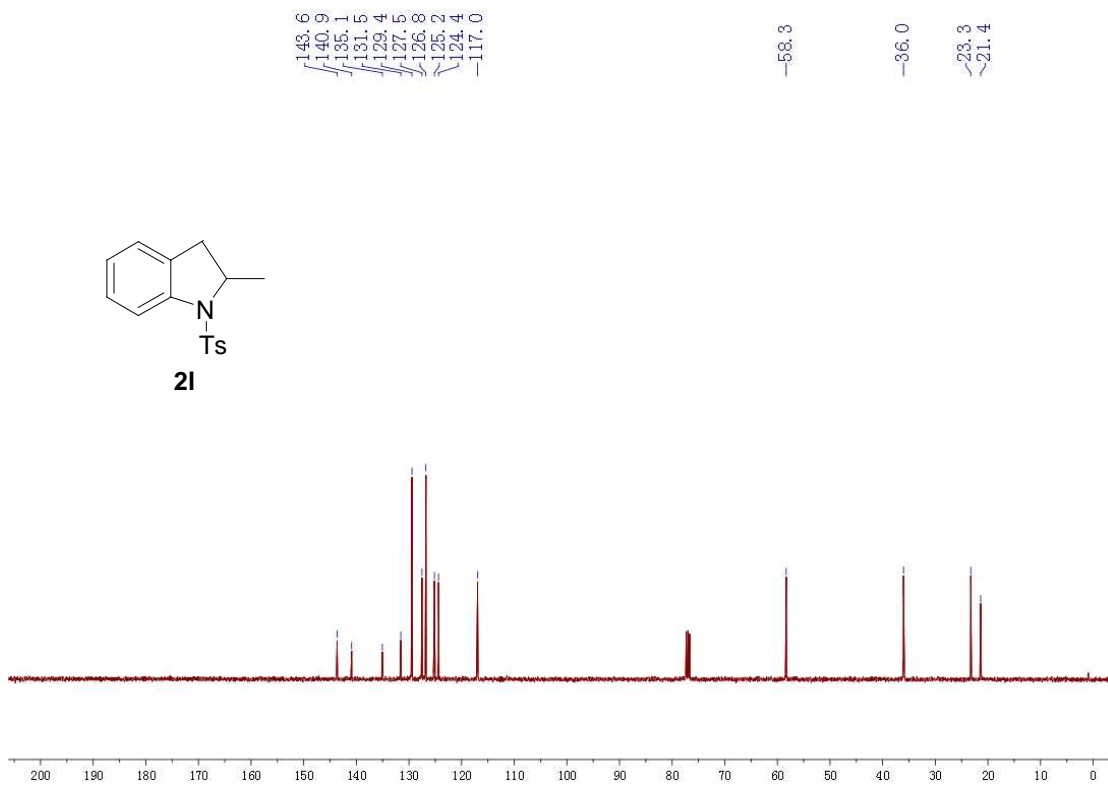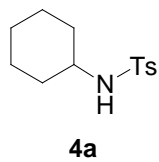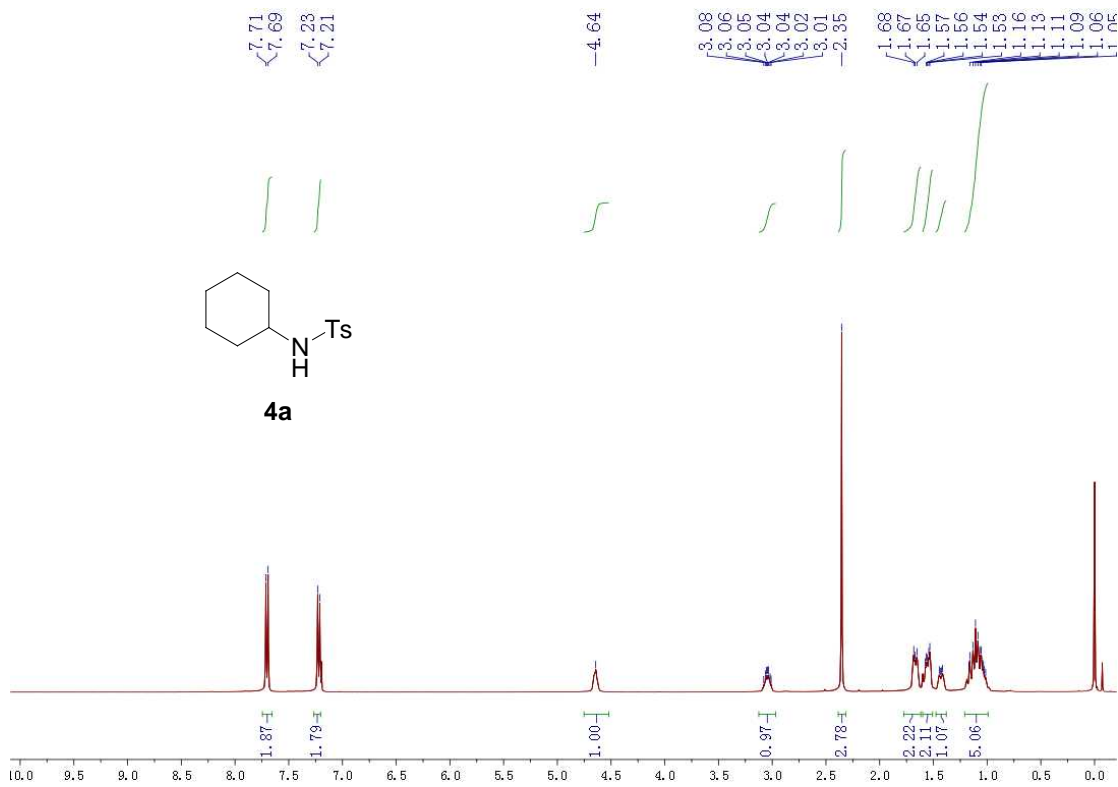

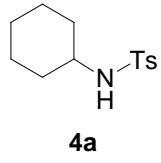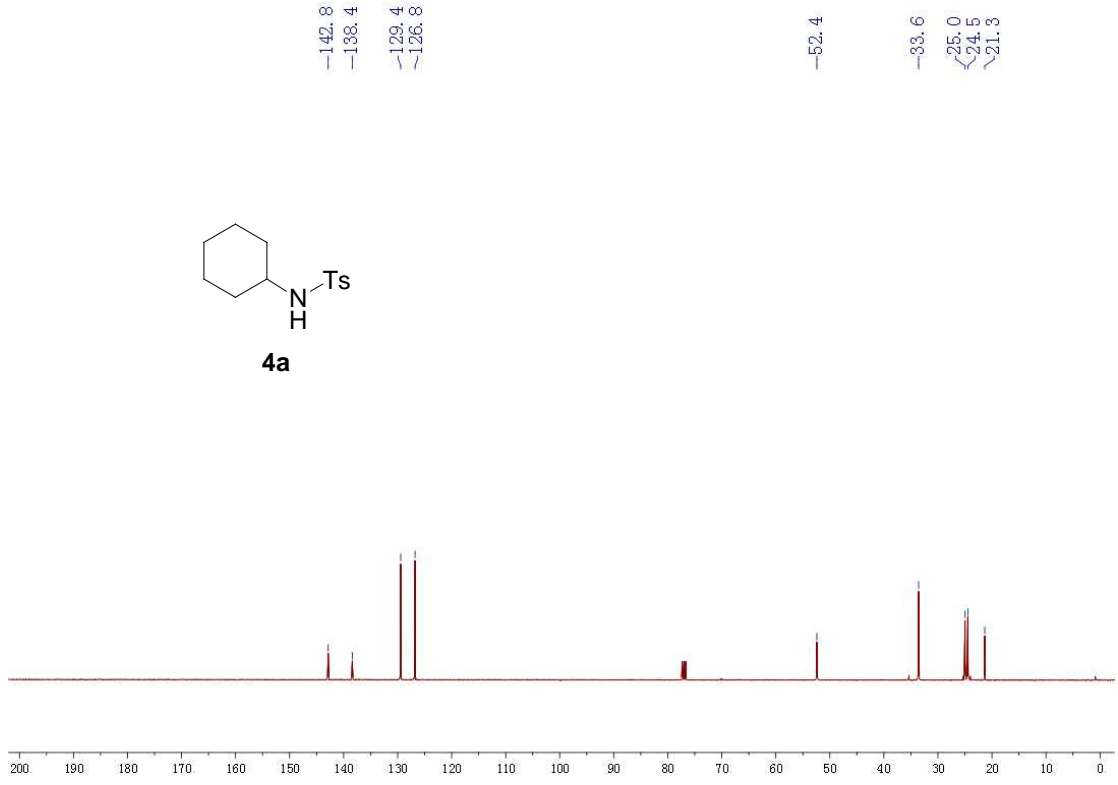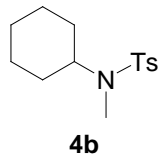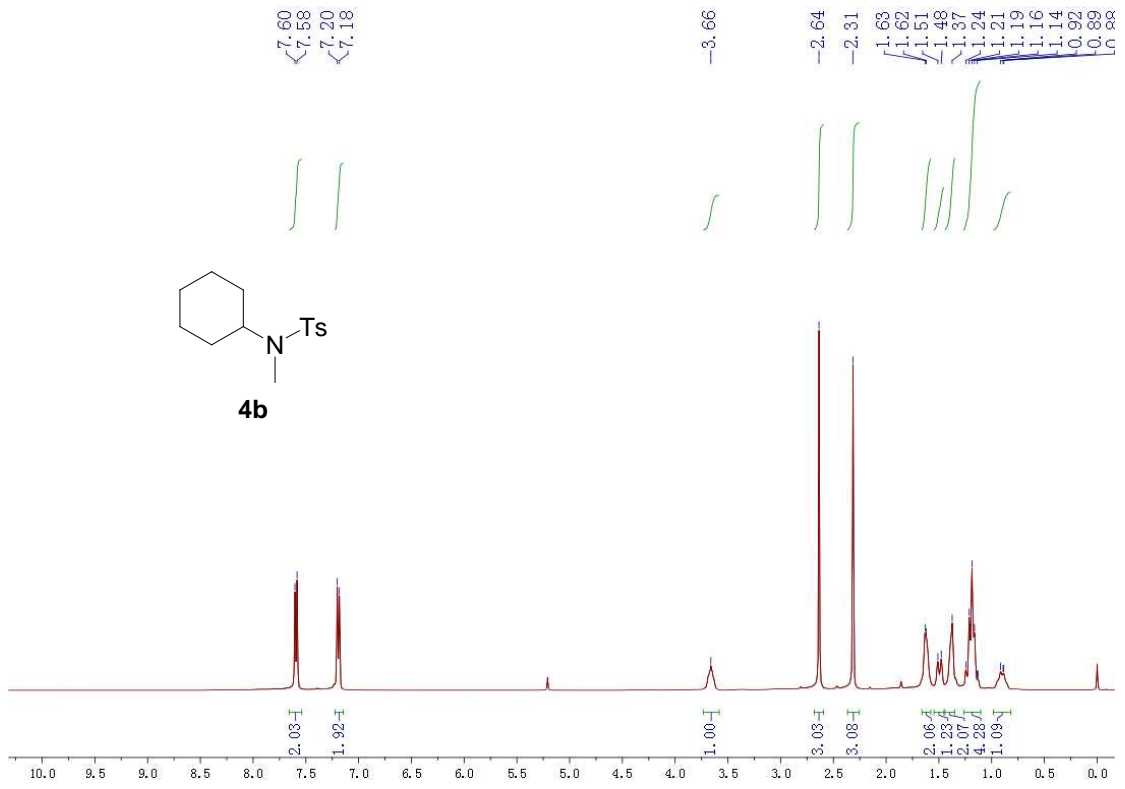

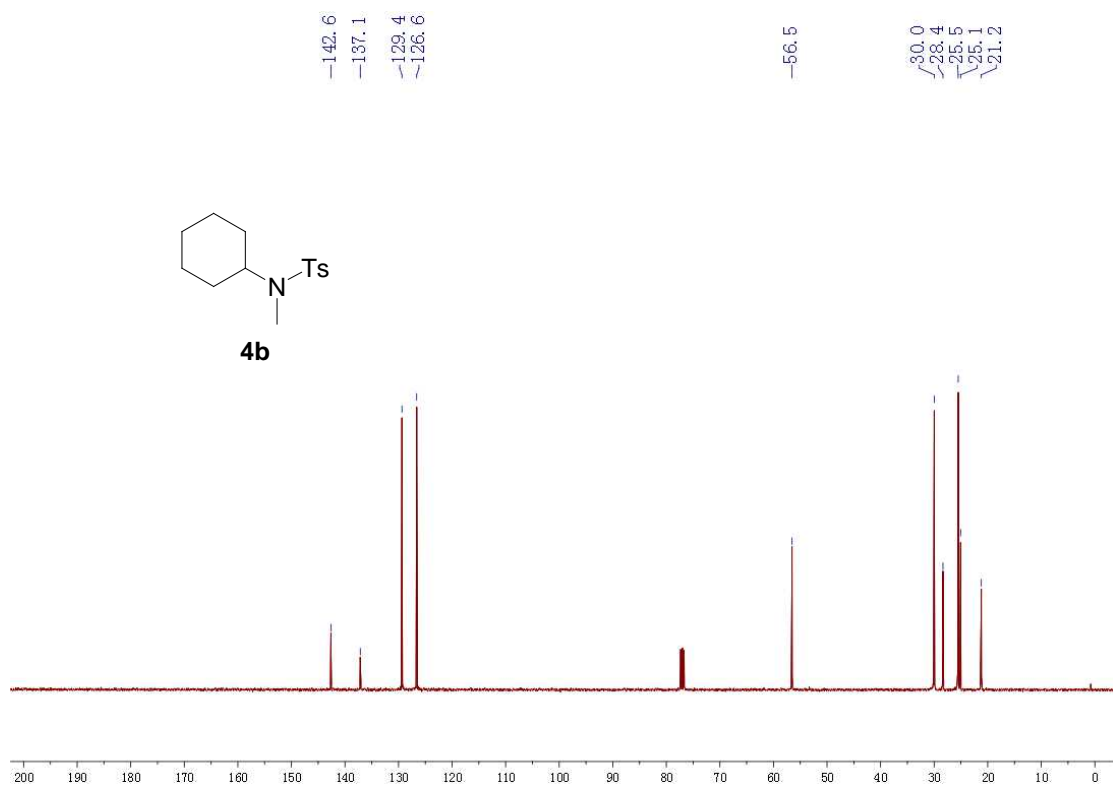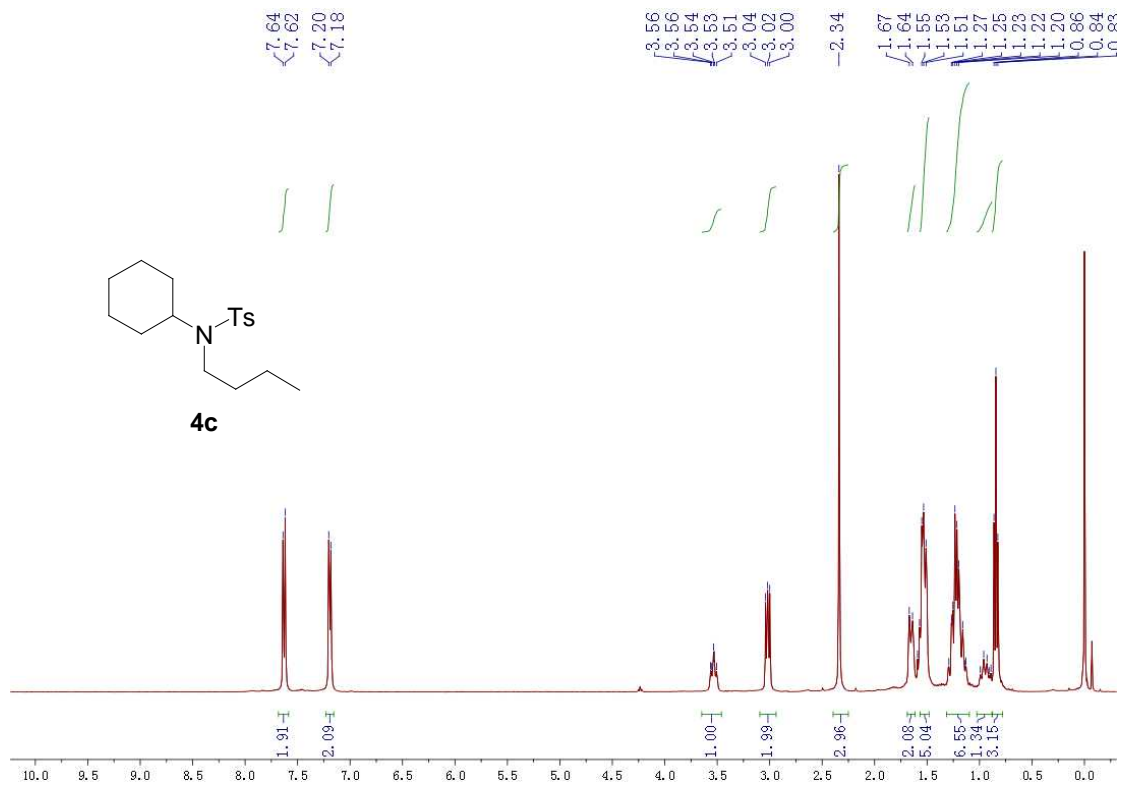

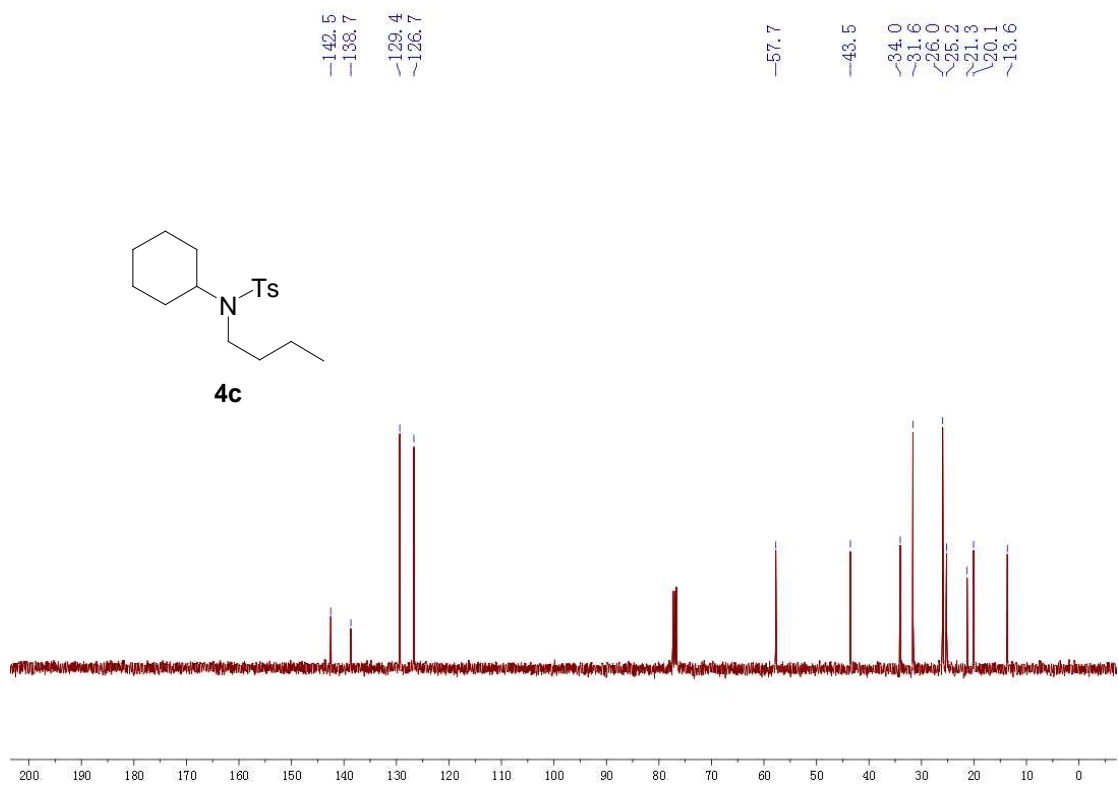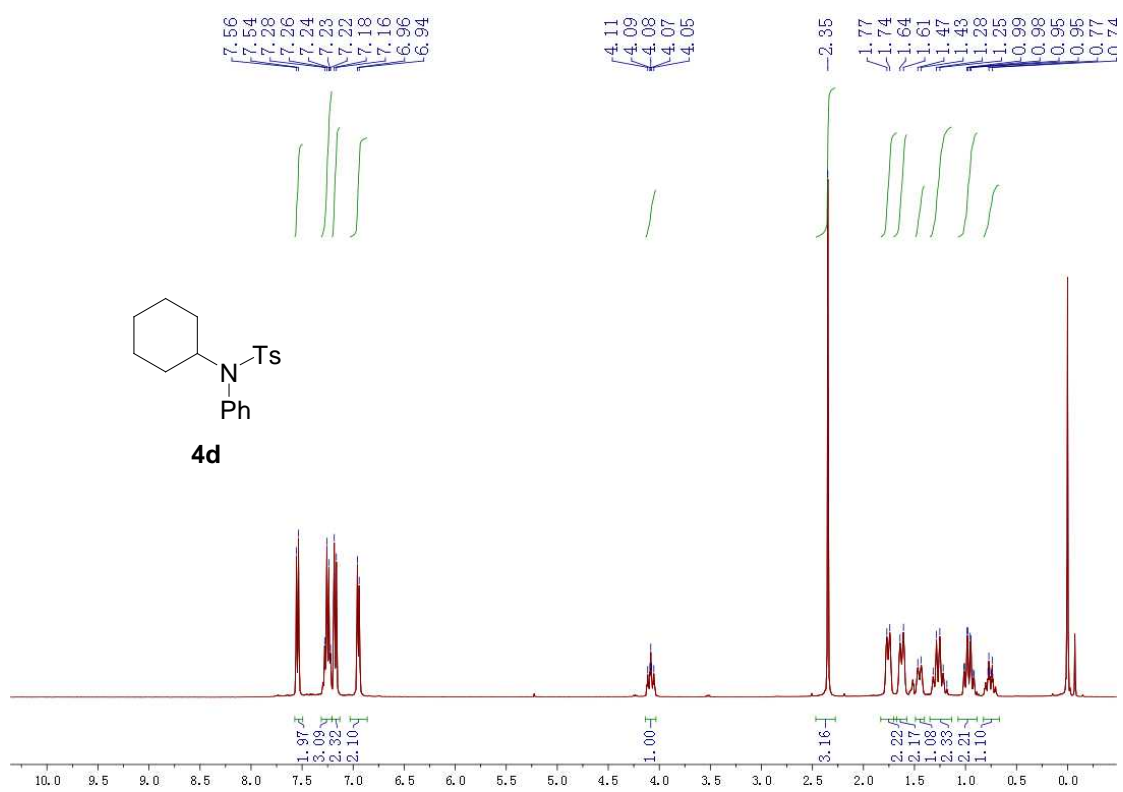



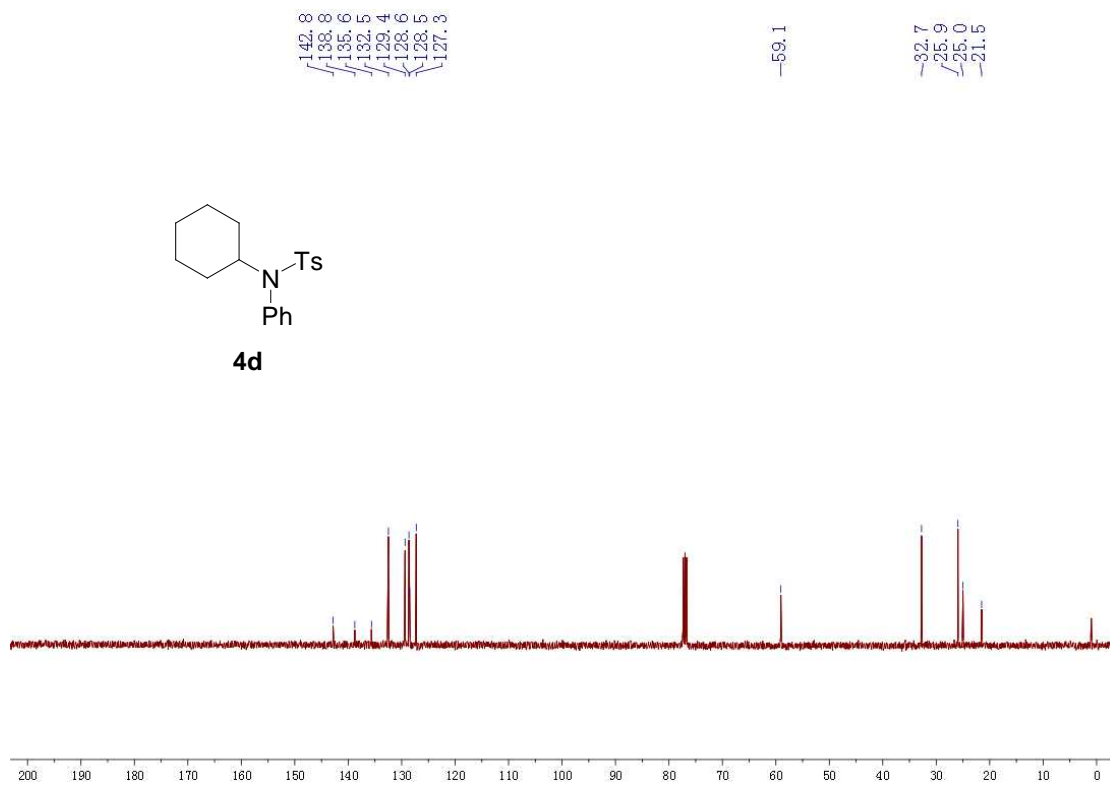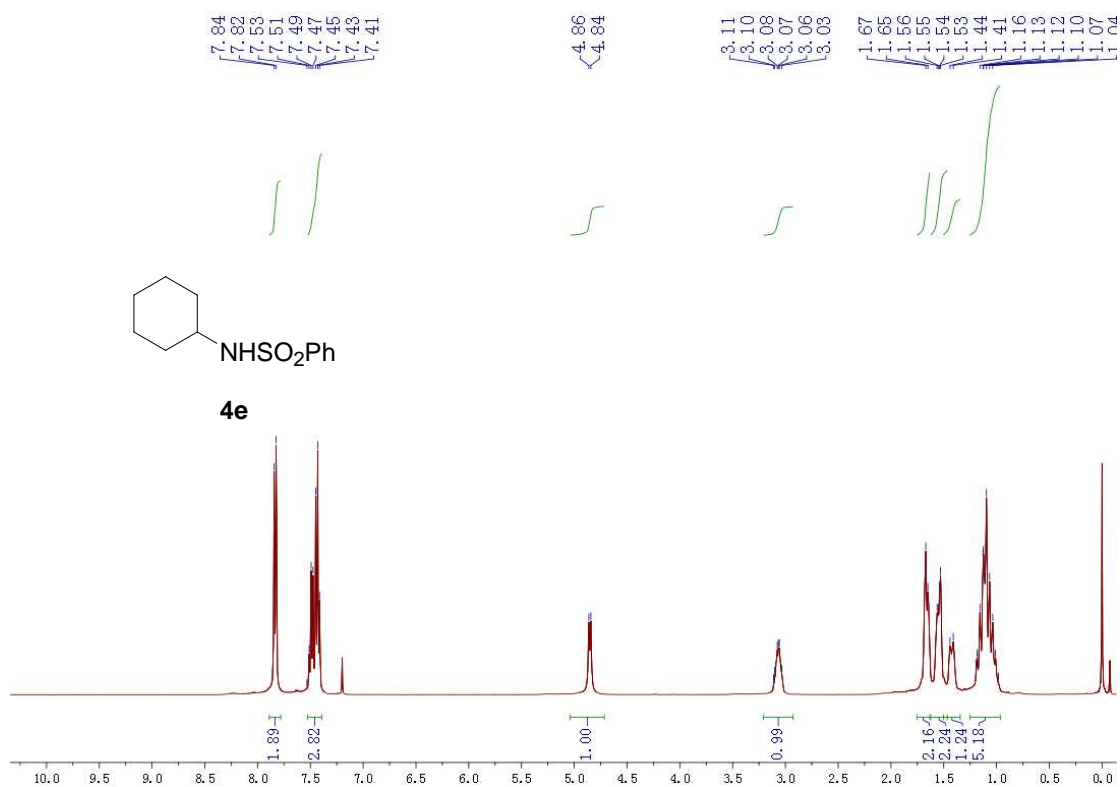

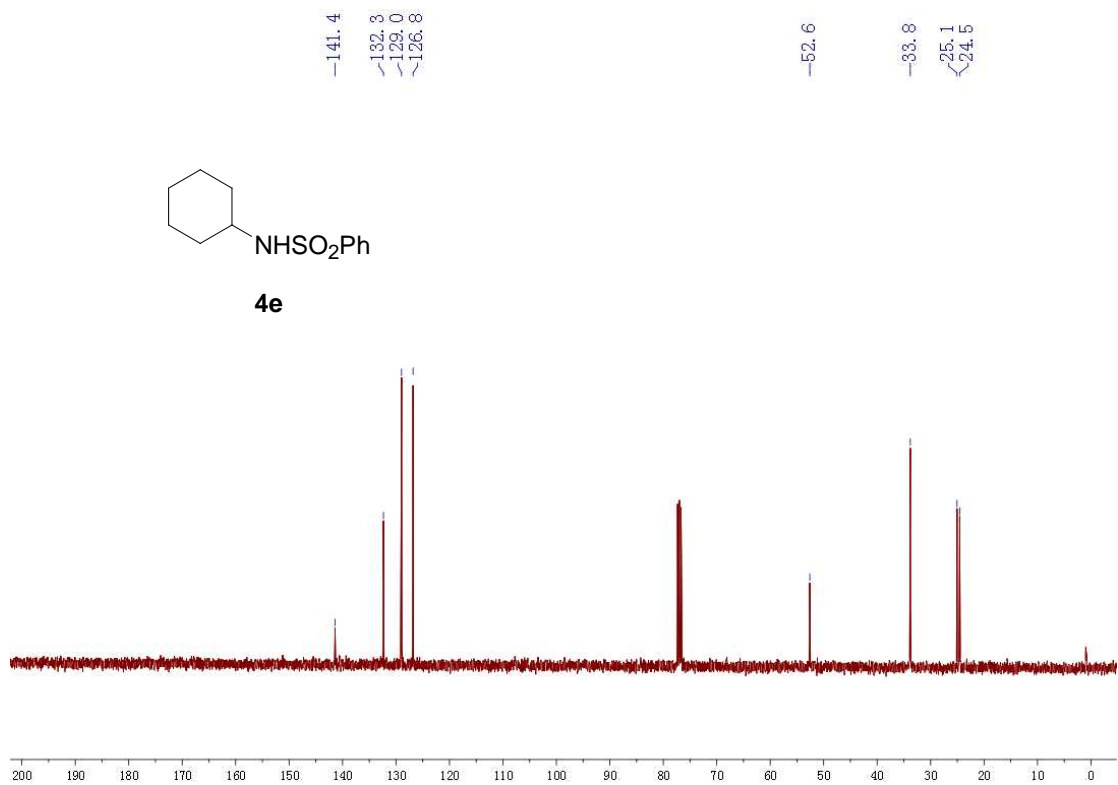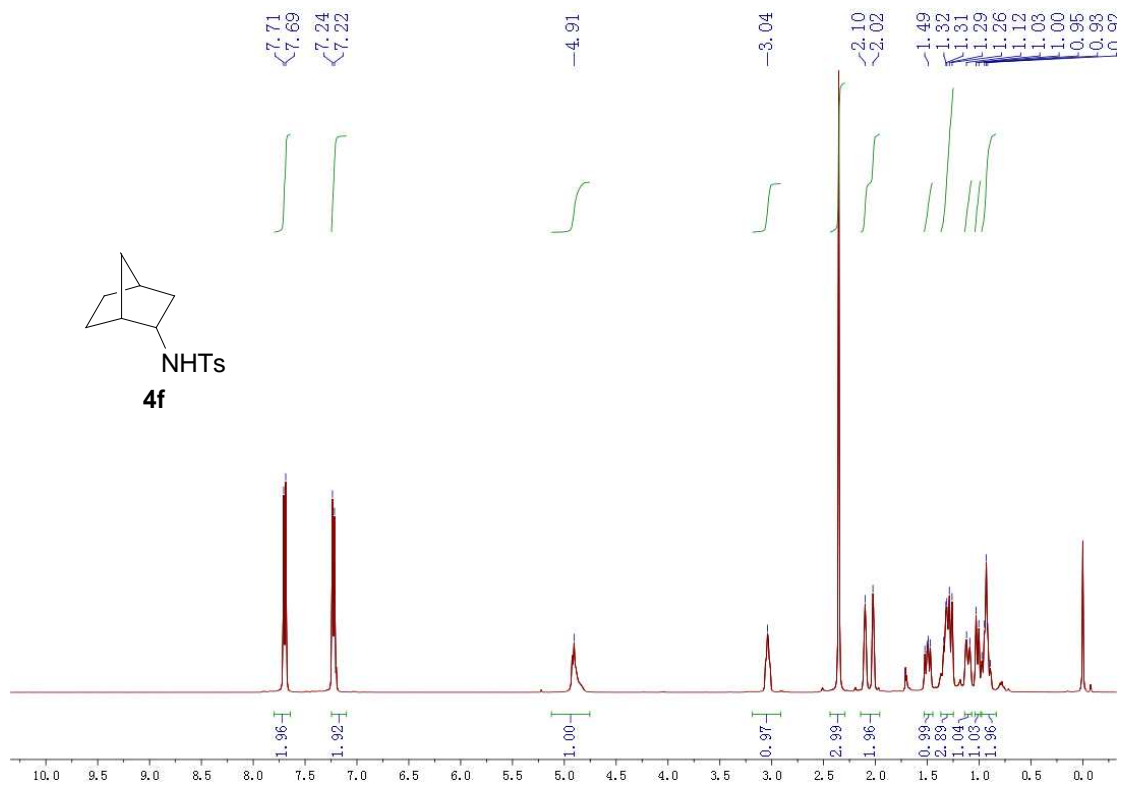

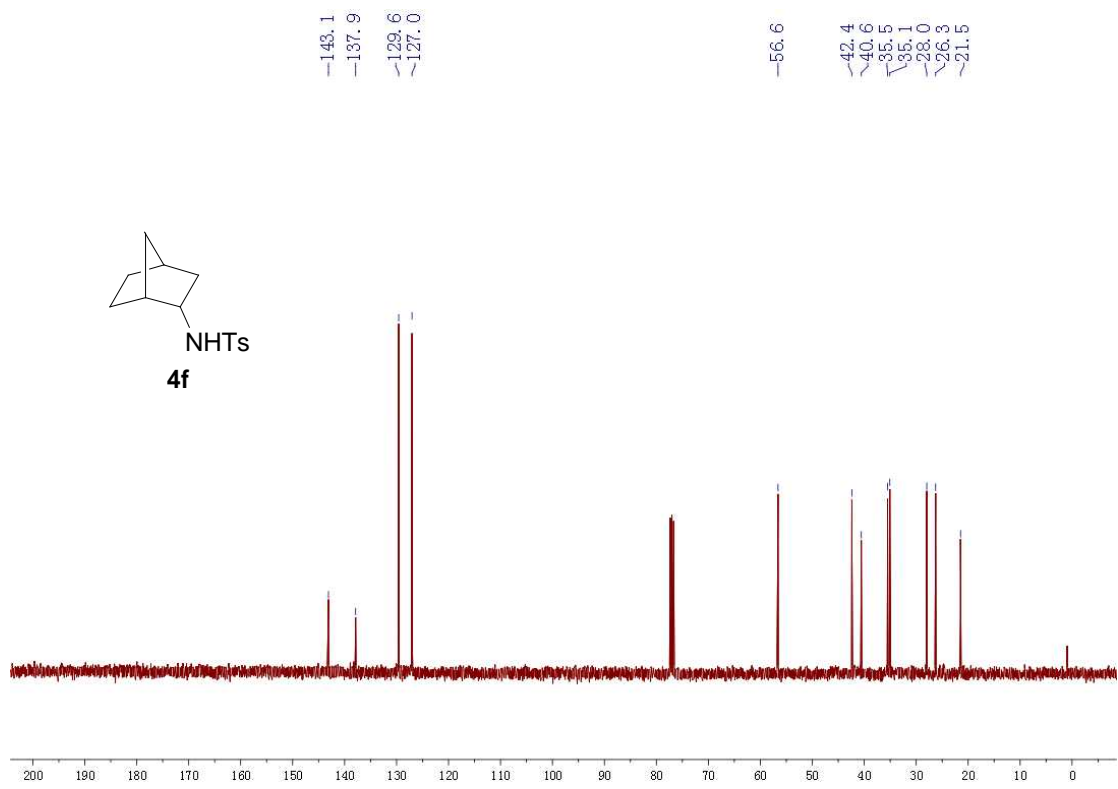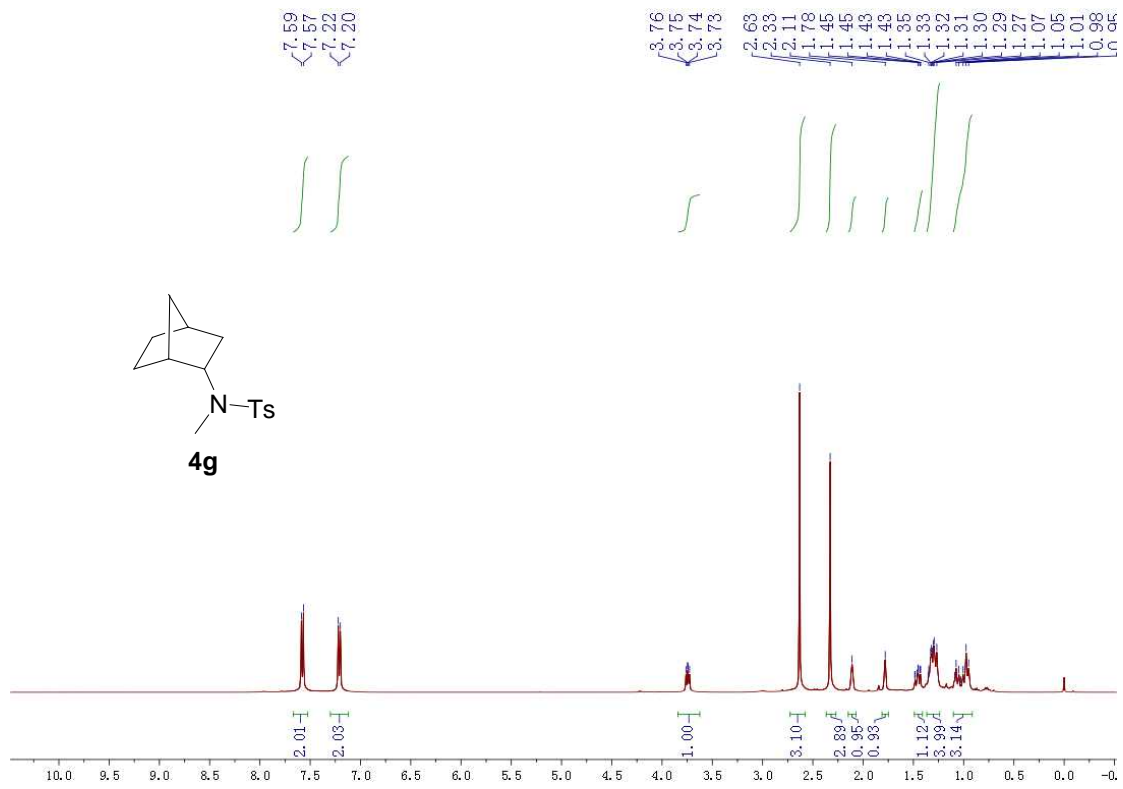

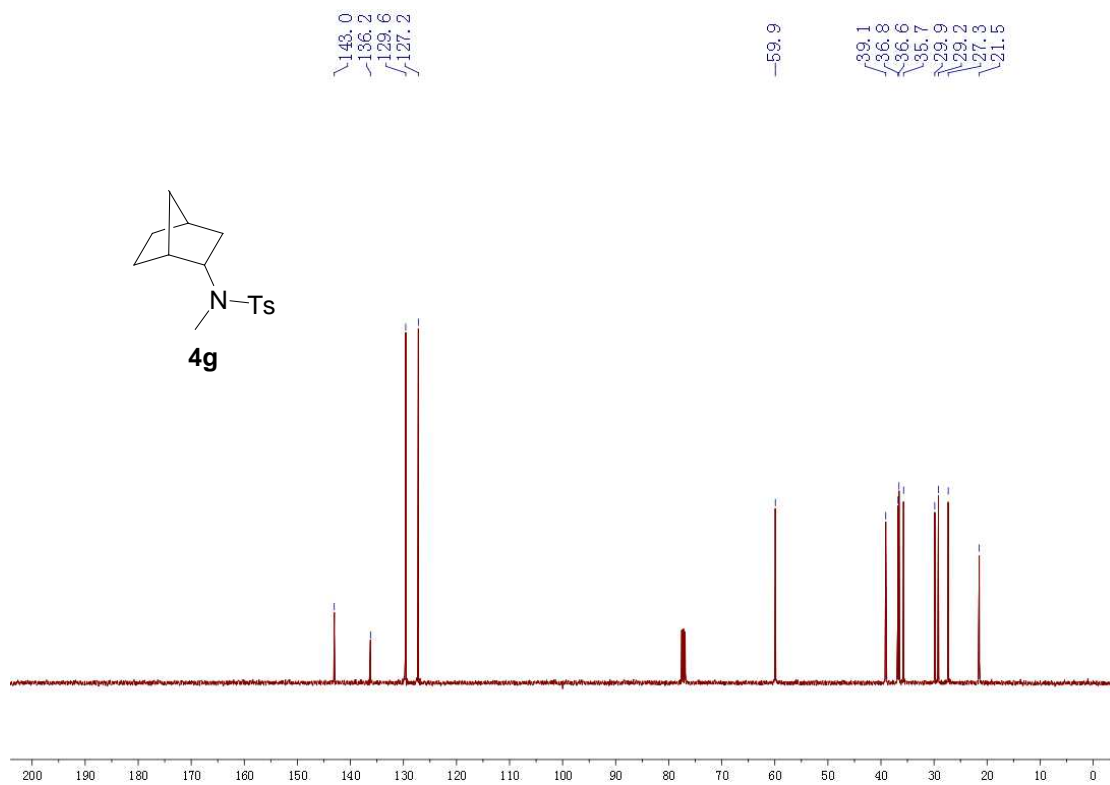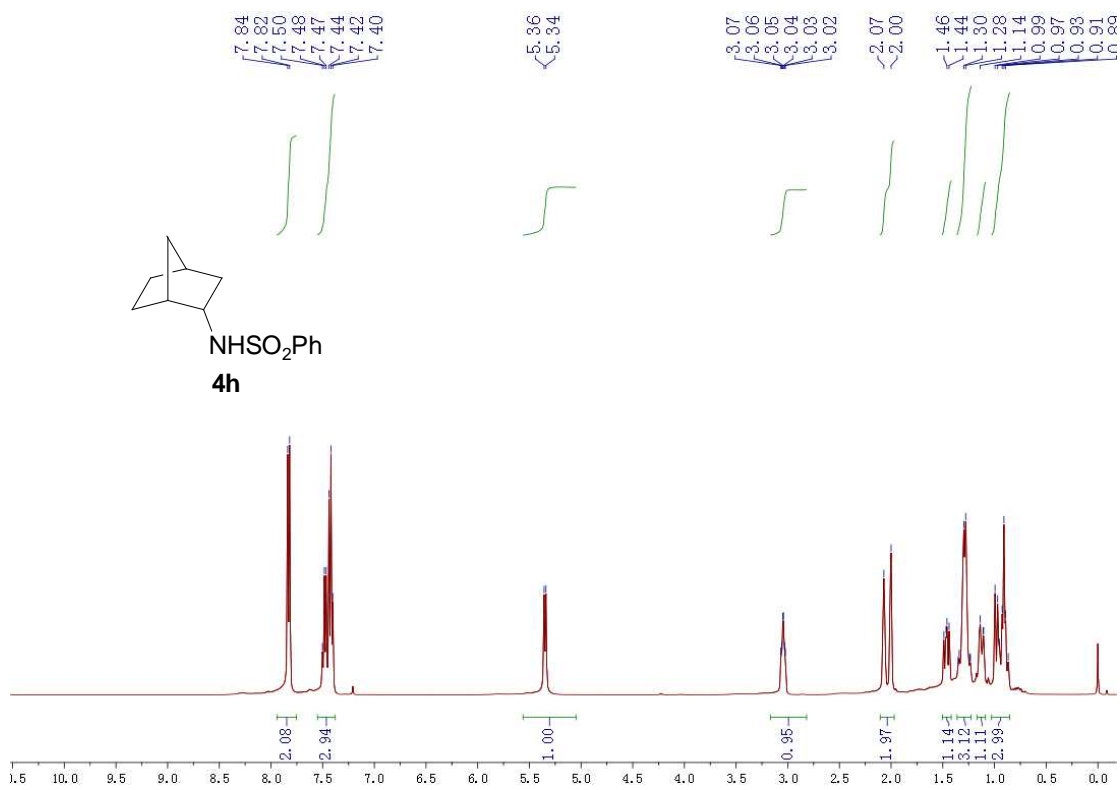

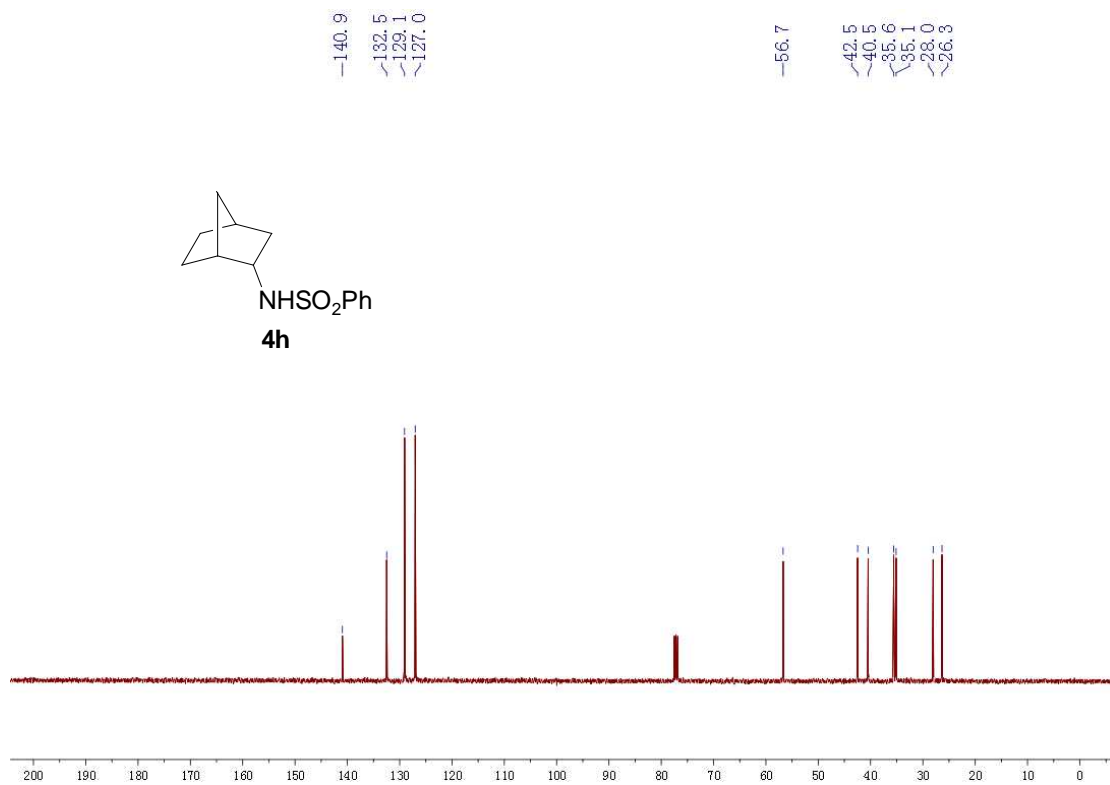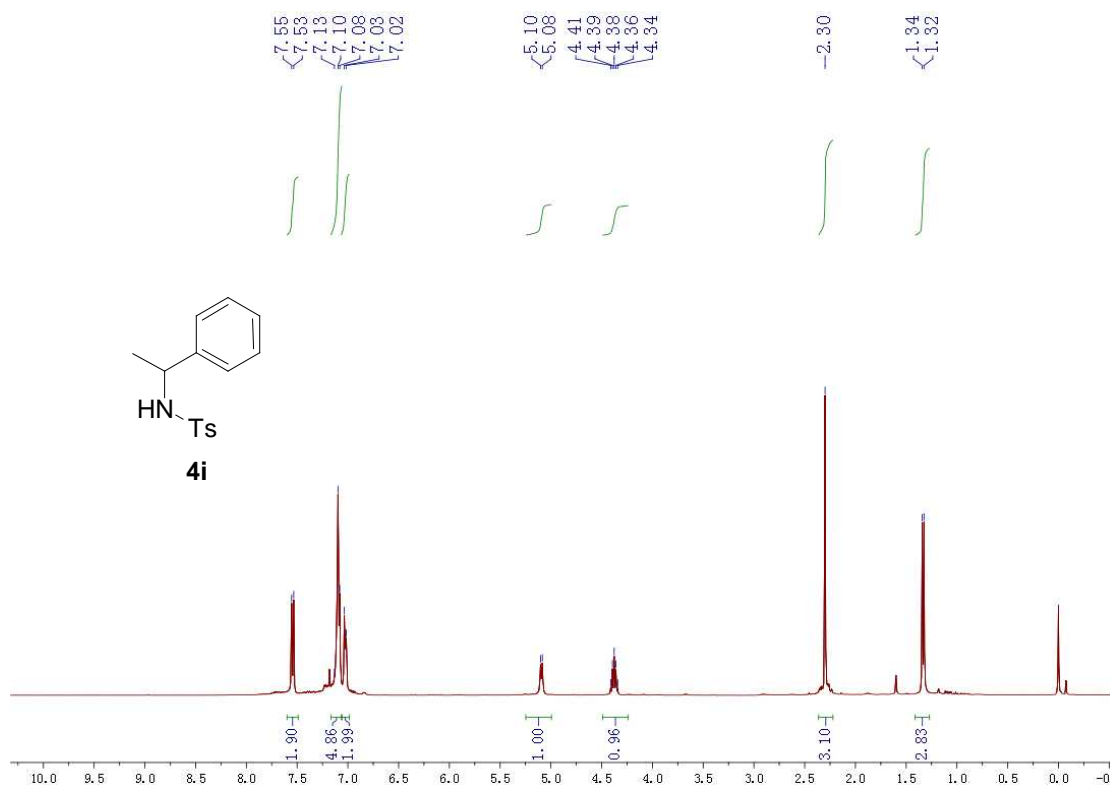

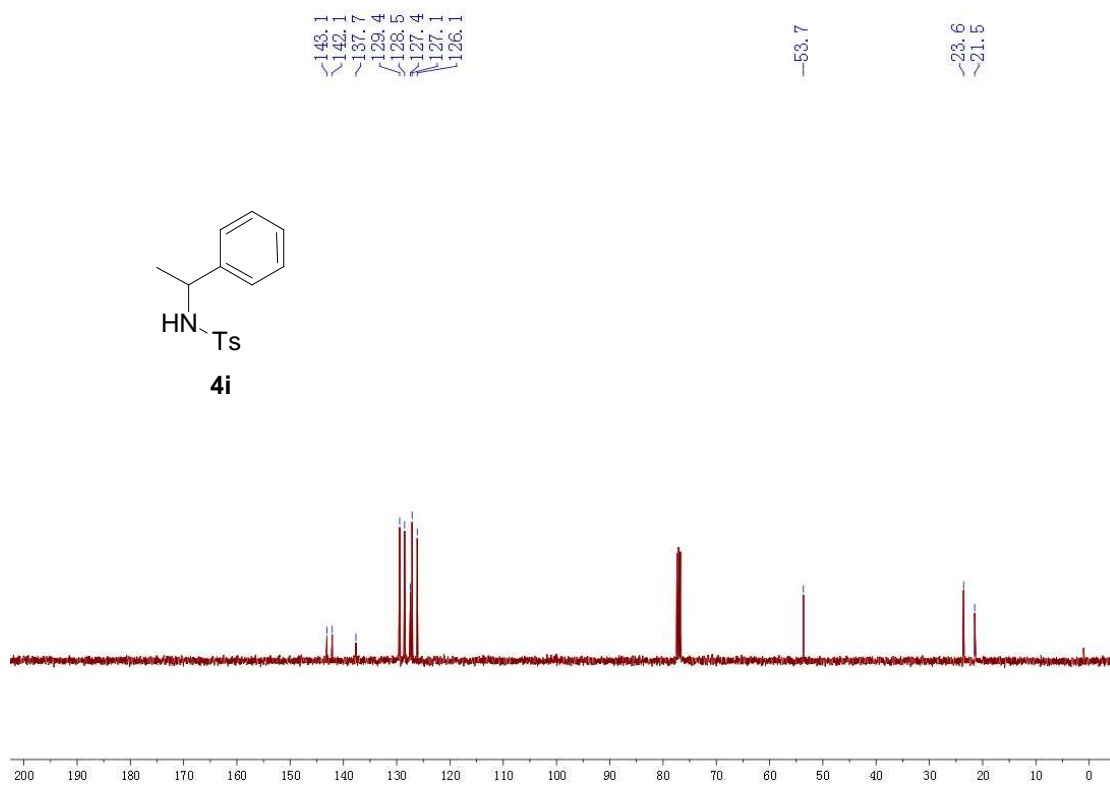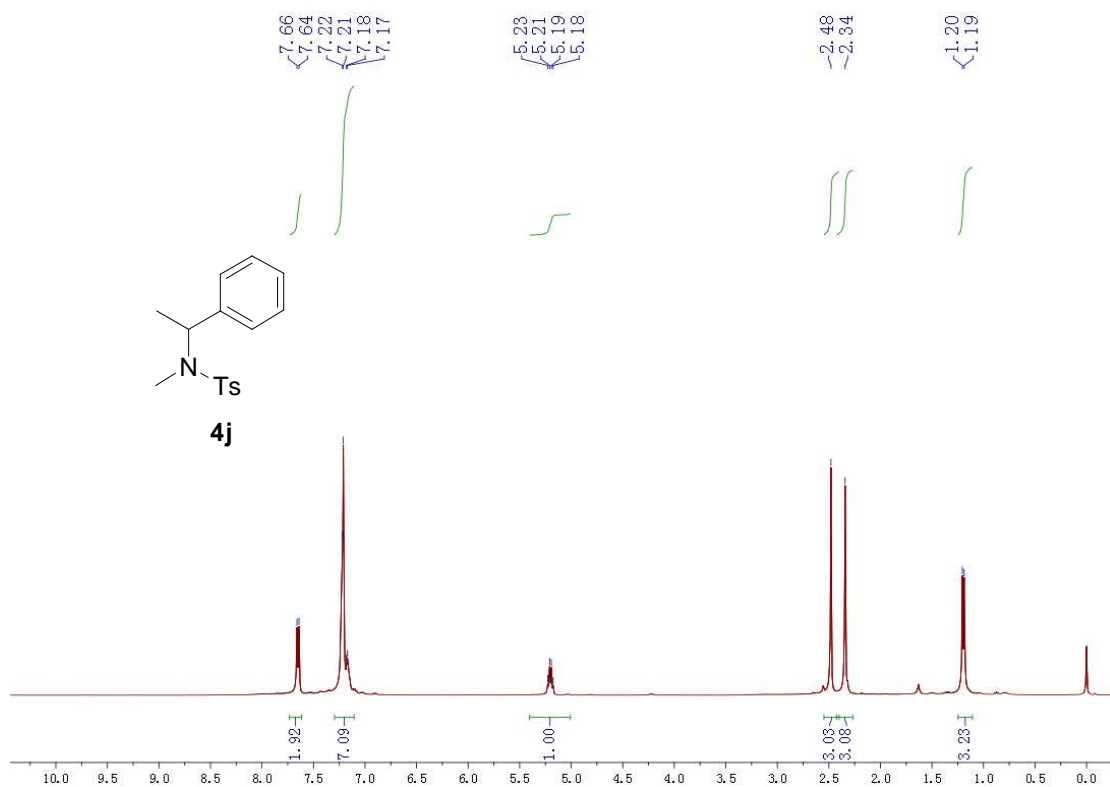

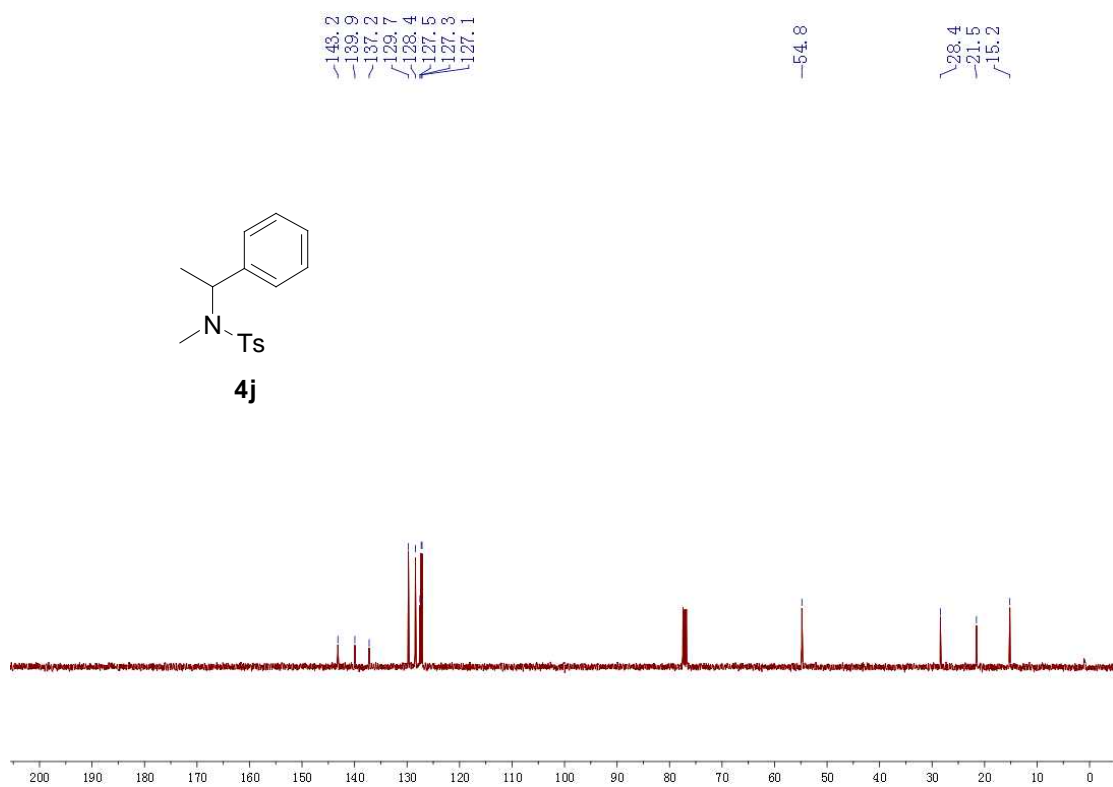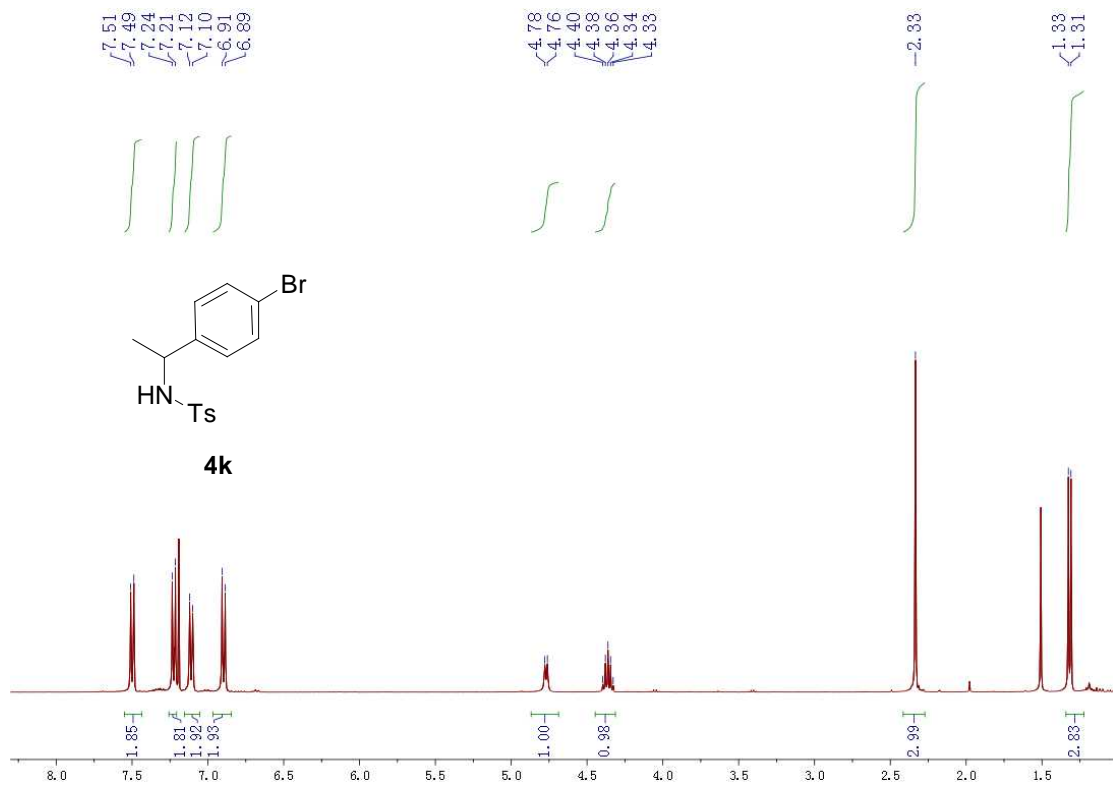

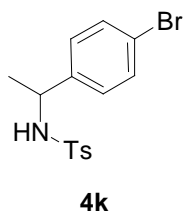

143.4  
 141.1  
 137.4  
 131.5  
 129.5  
 128.0  
 127.1  
 121.2

-58.1

23.4  
21.5

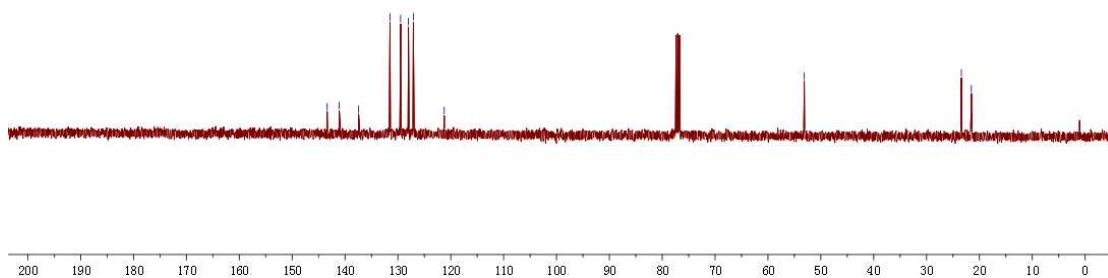

7.98  
 7.96  
 7.96  
 7.47  
 7.45  
 7.43  
 7.36  
 7.34  
 7.32  
 4.98  
 4.97  
 4.96  
 4.95  
 4.94  
 4.93  
 4.92  
 1.88  
 1.87  
 1.86  
 1.85  
 1.84  
 1.74  
 1.72  
 1.71  
 1.70  
 1.69  
 1.55  
 1.54  
 1.52  
 1.49  
 1.49  
 1.47  
 1.46  
 1.41  
 1.40  
 1.38  
 1.38  
 1.37  
 1.36  
 1.35  
 1.34  
 1.34  
 1.33  
 1.32  
 1.31  
 1.30  
 1.29  
 1.27  
 1.26  
 1.25  
 1.24  
 1.23

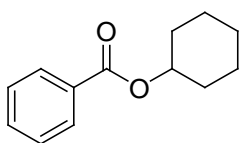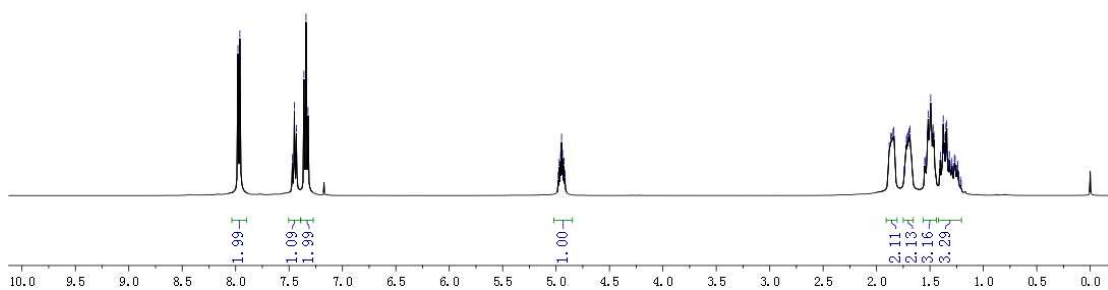



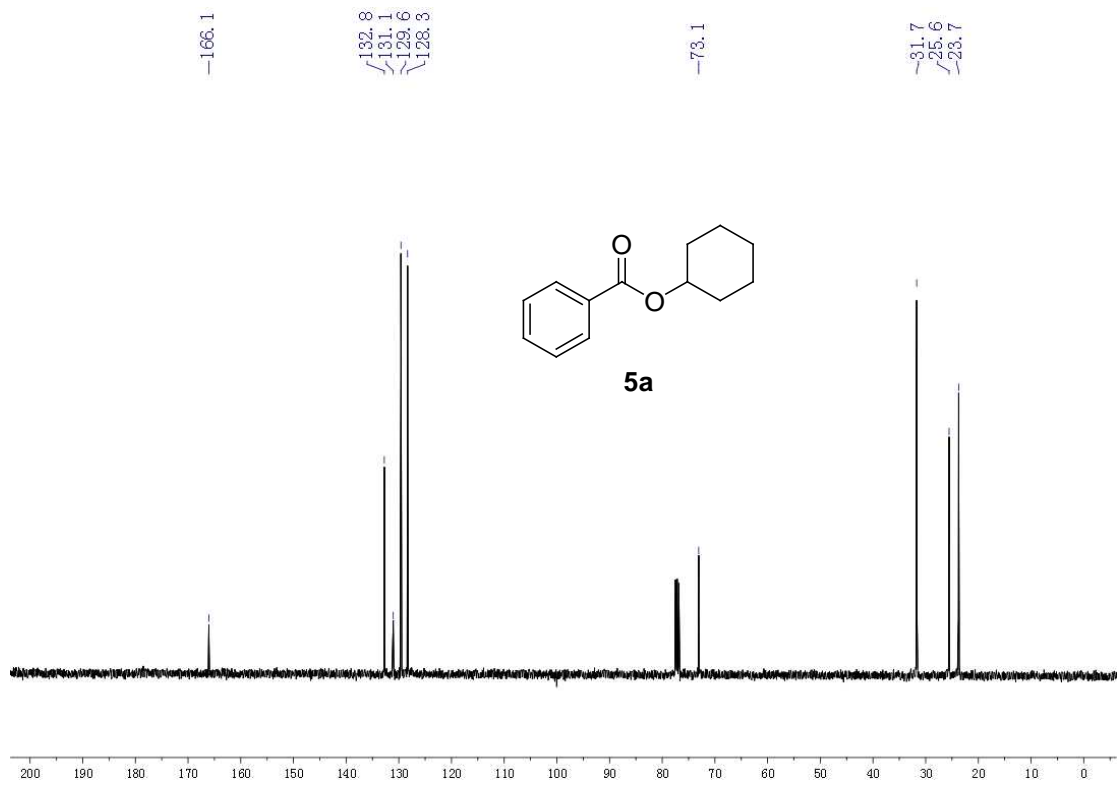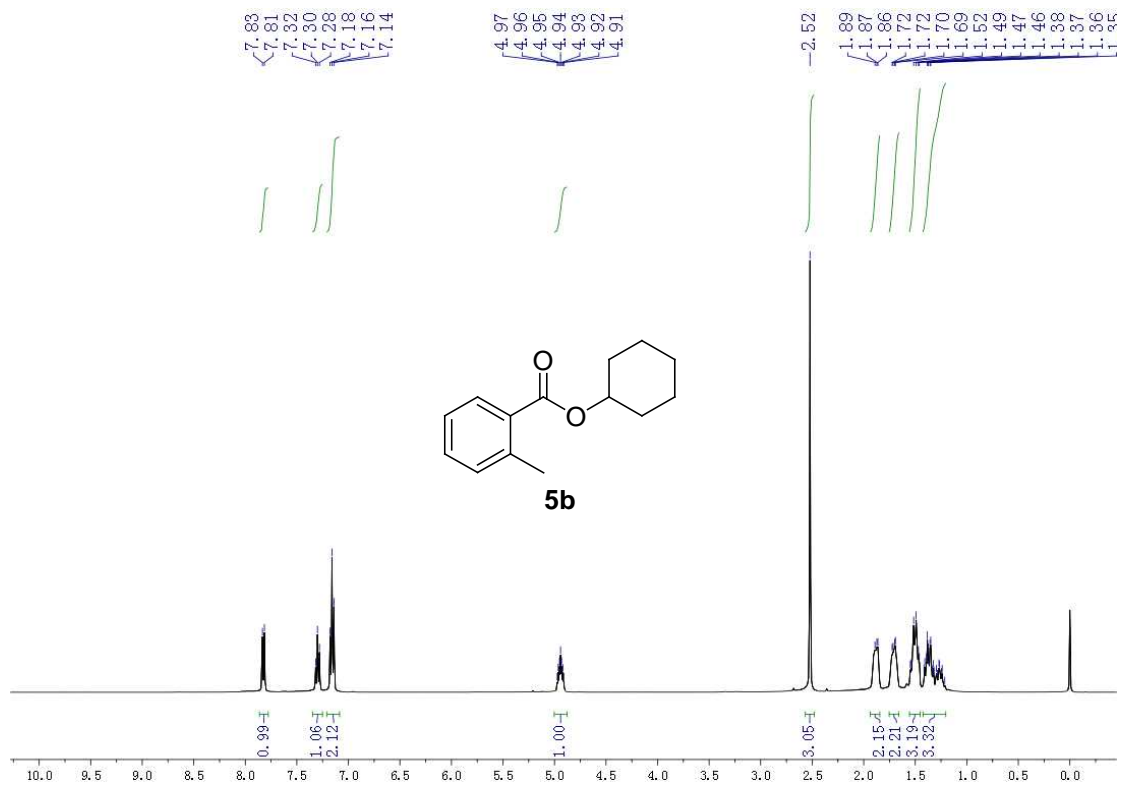

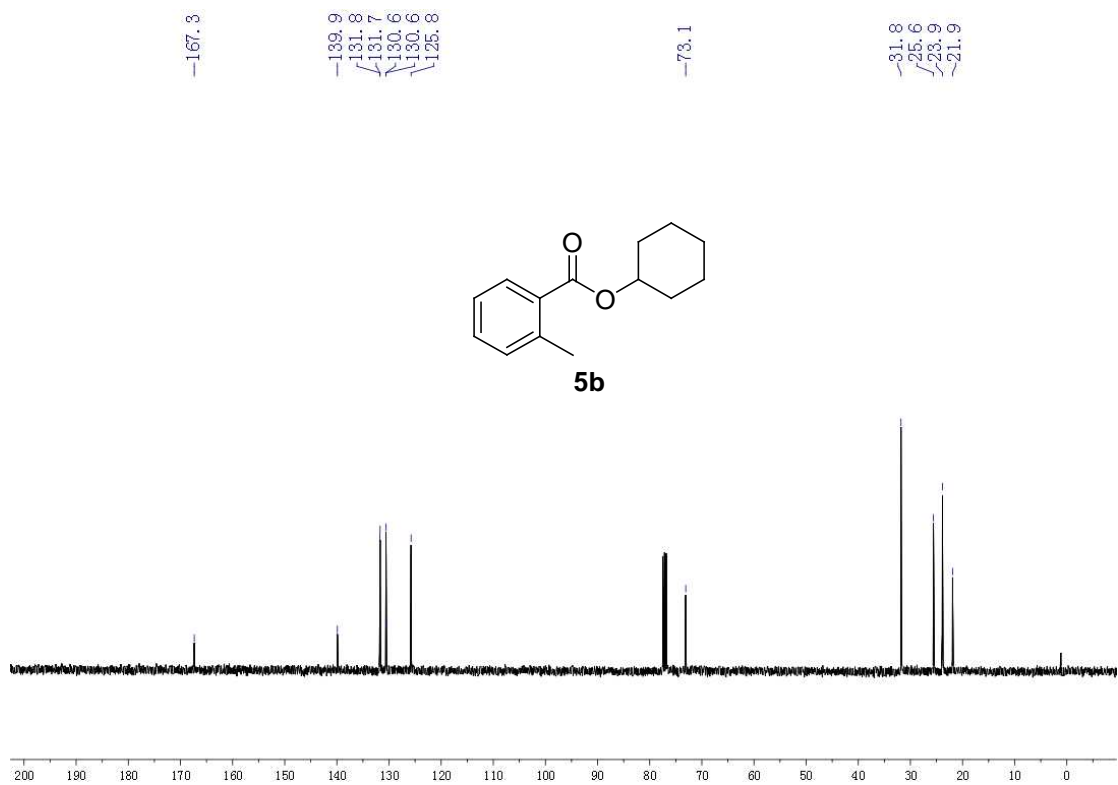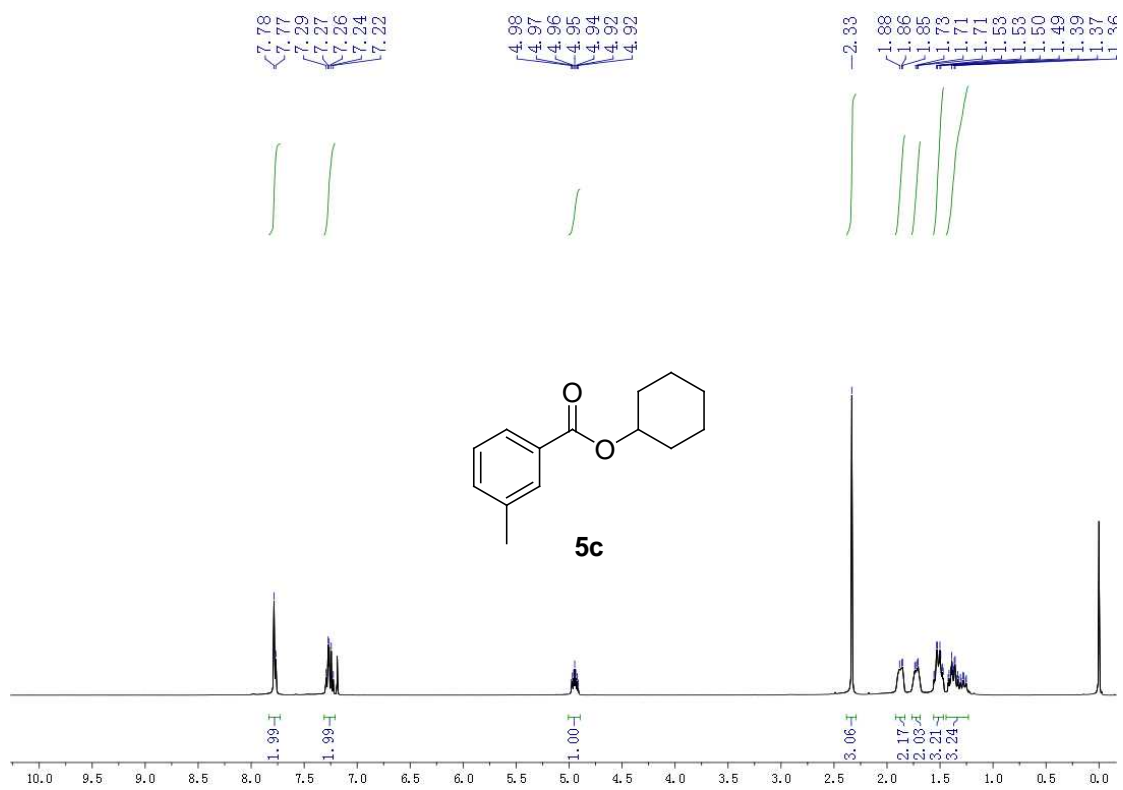

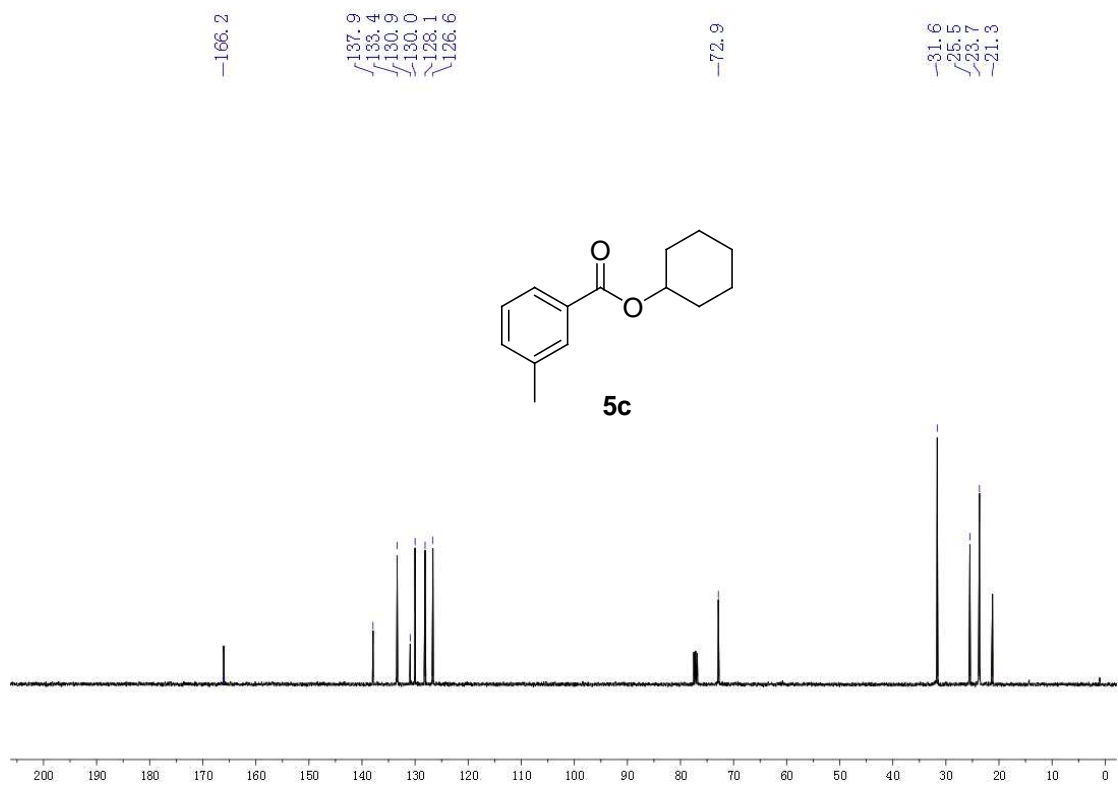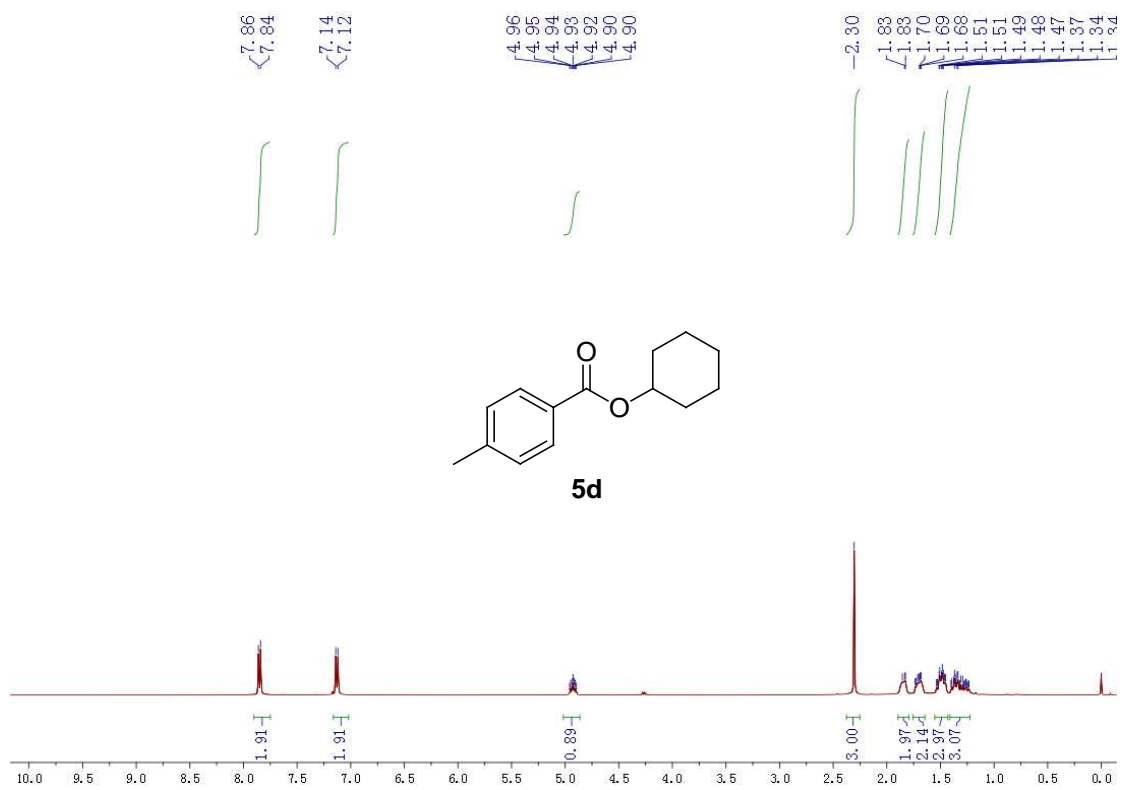

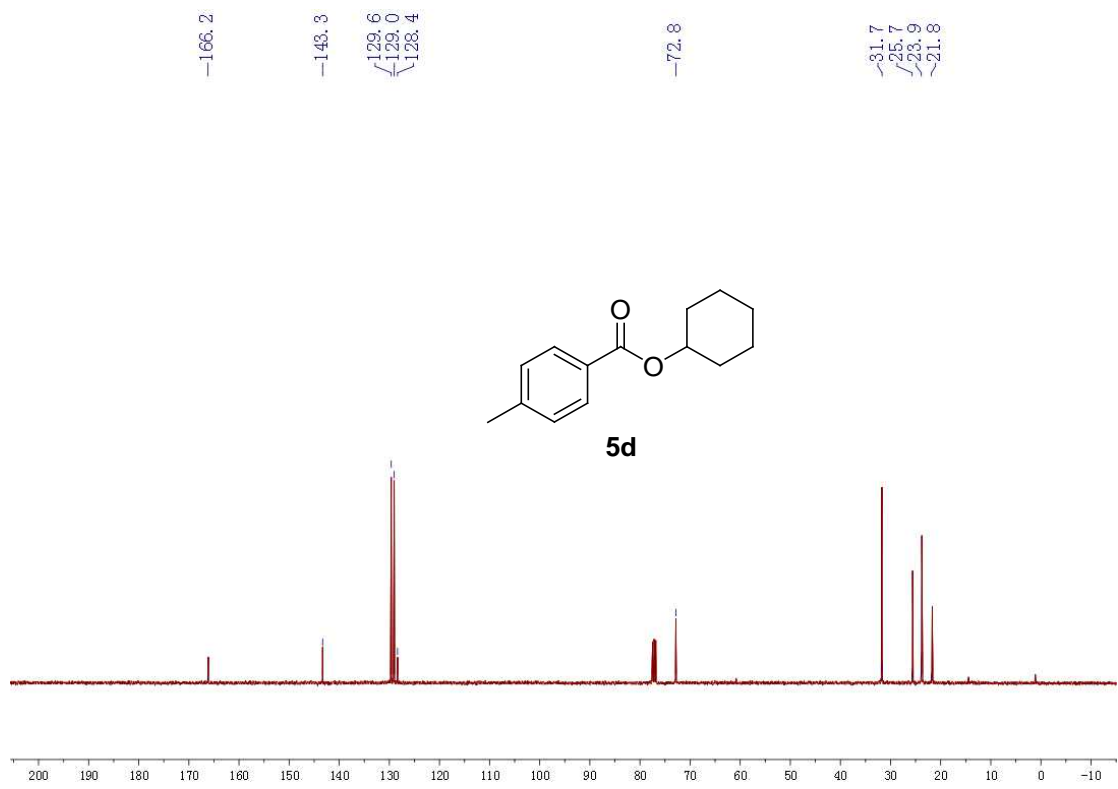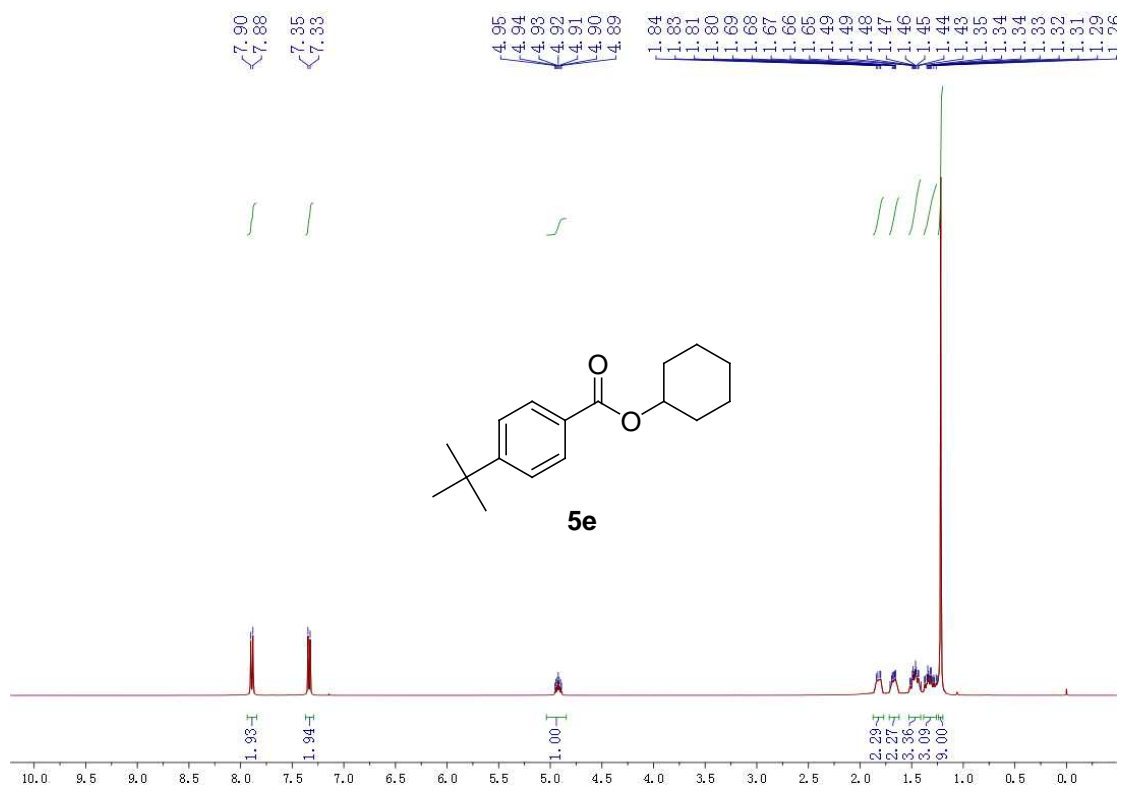

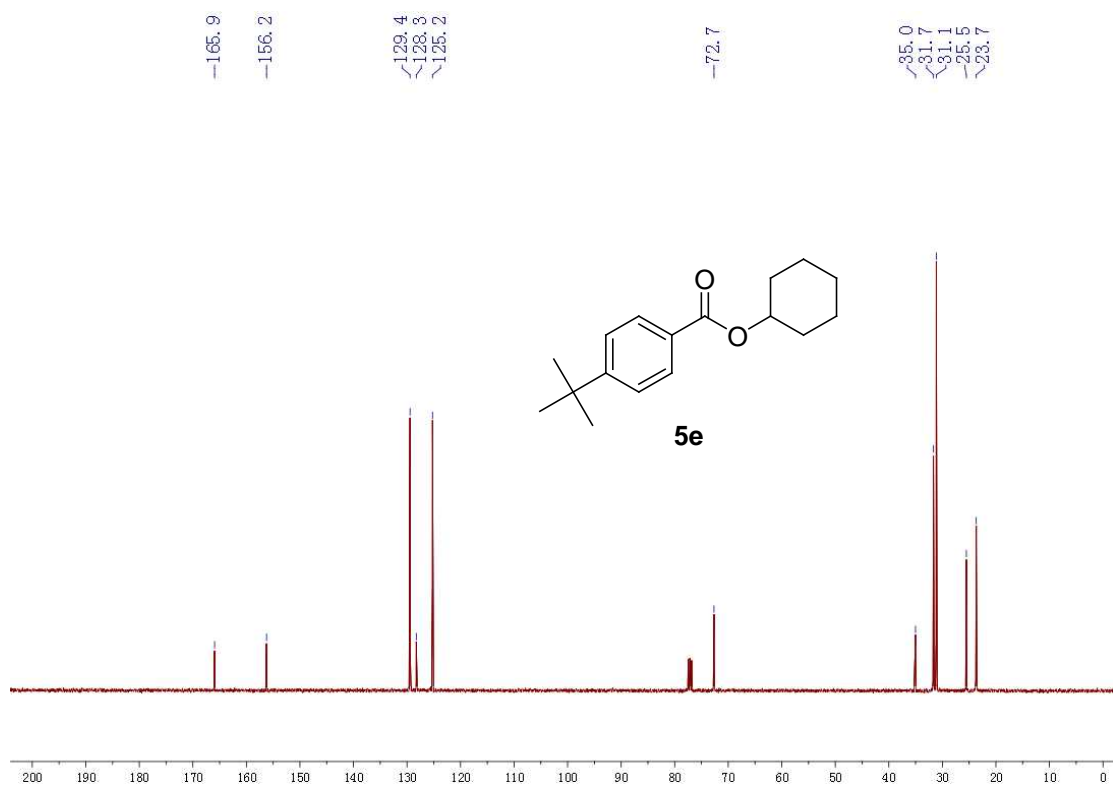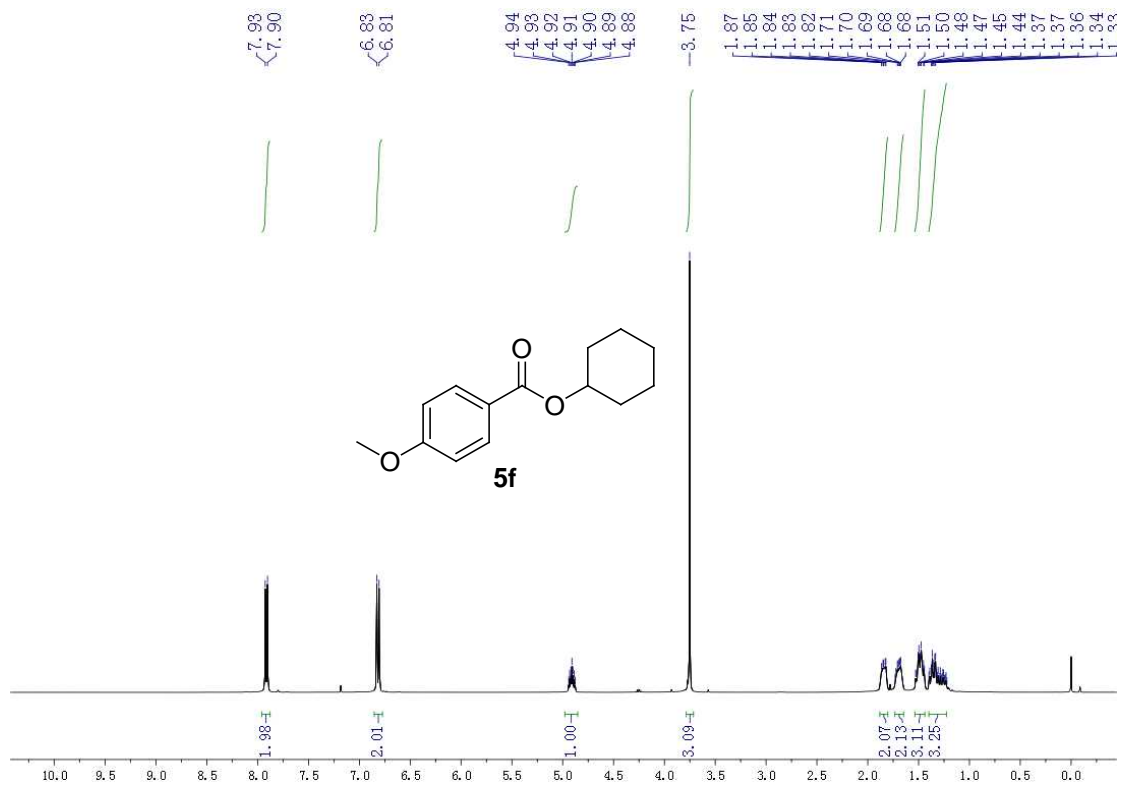

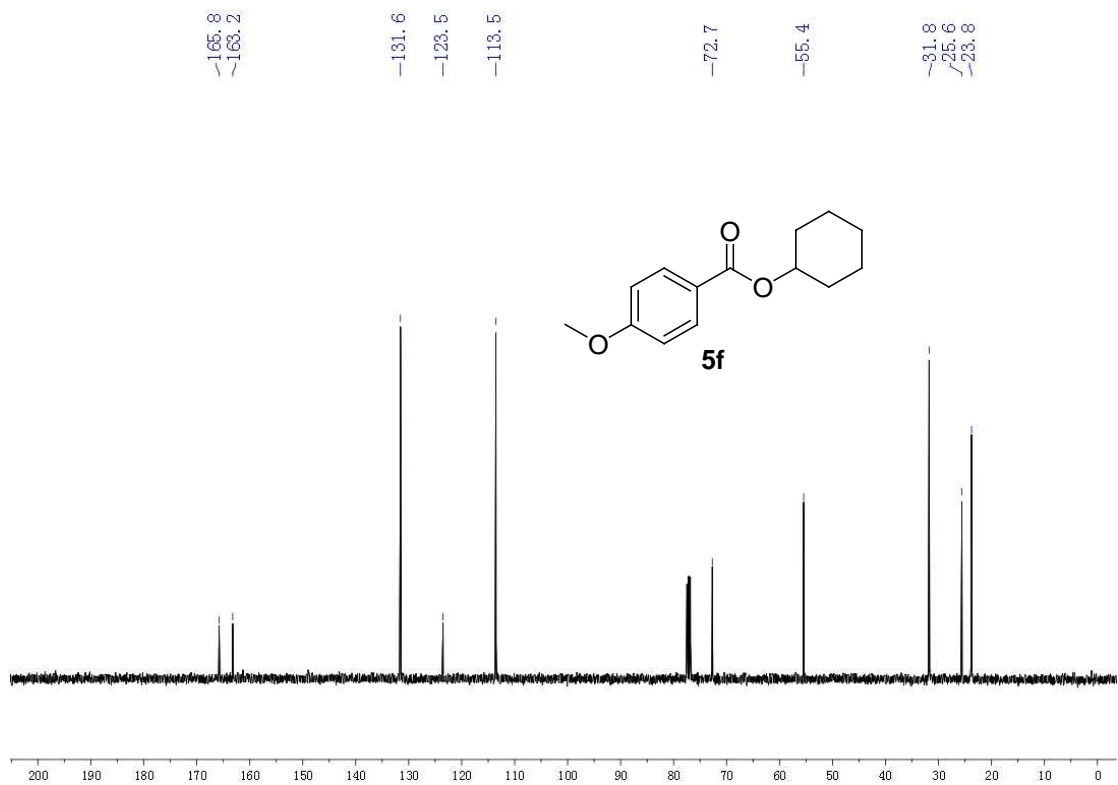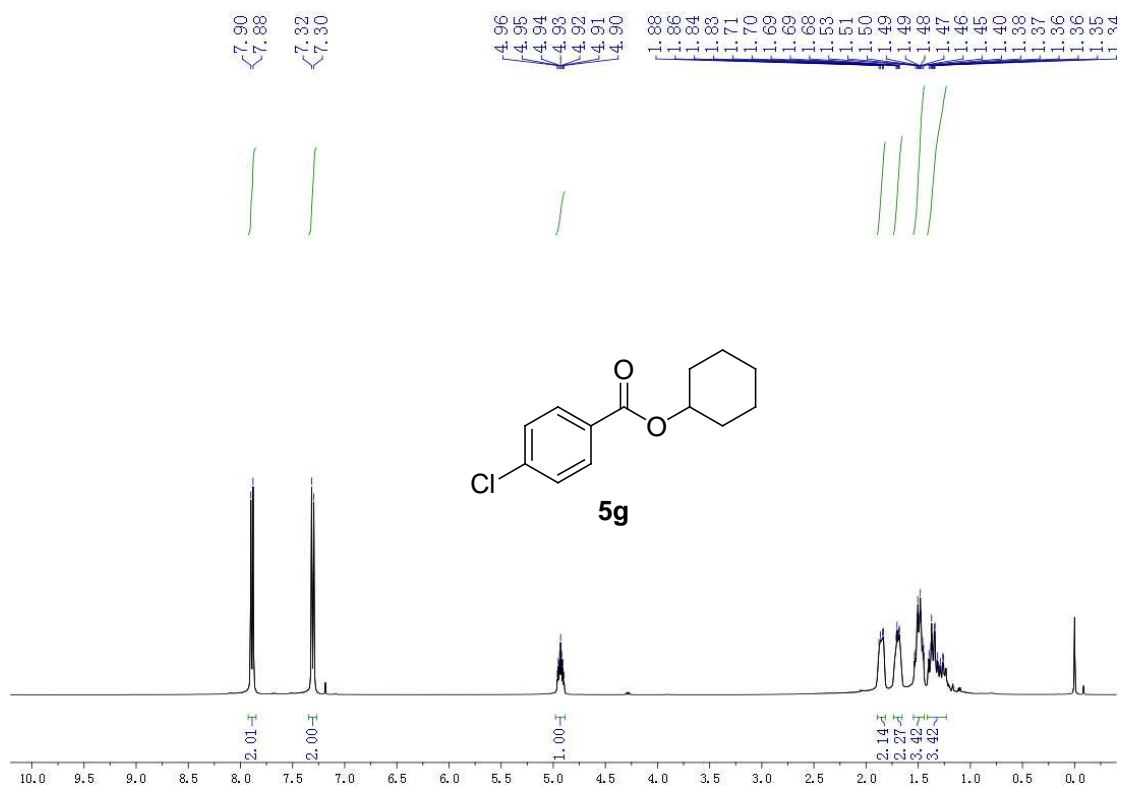

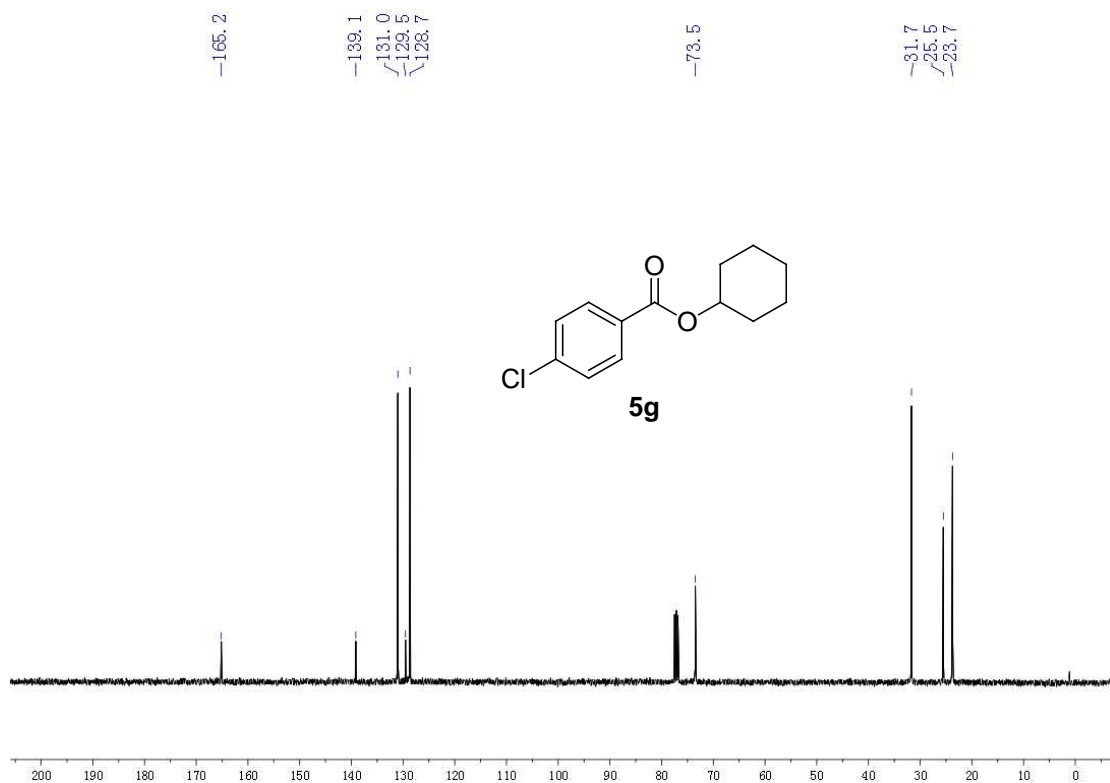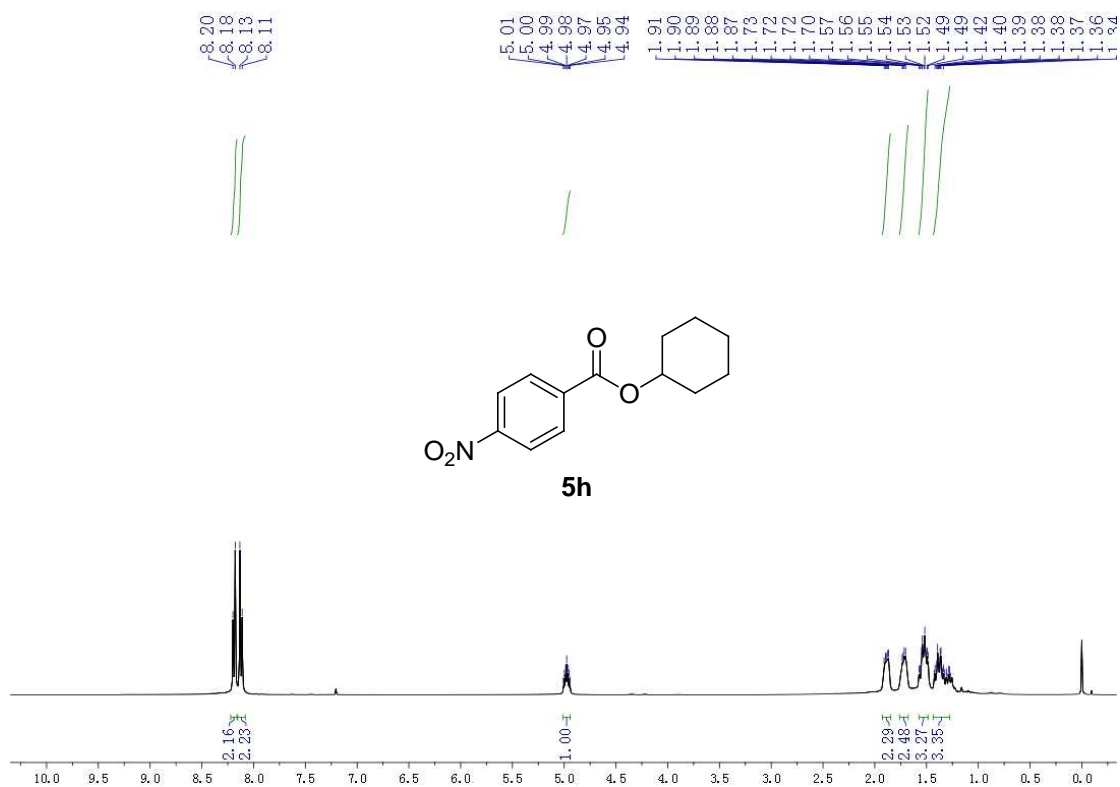

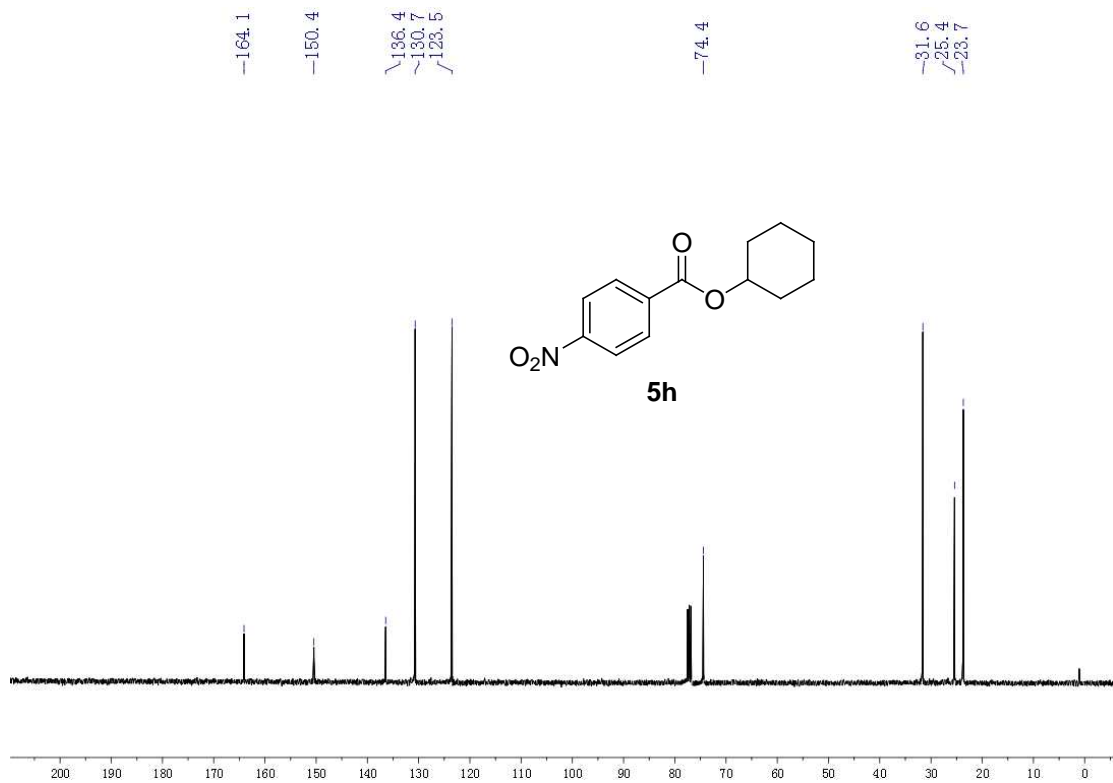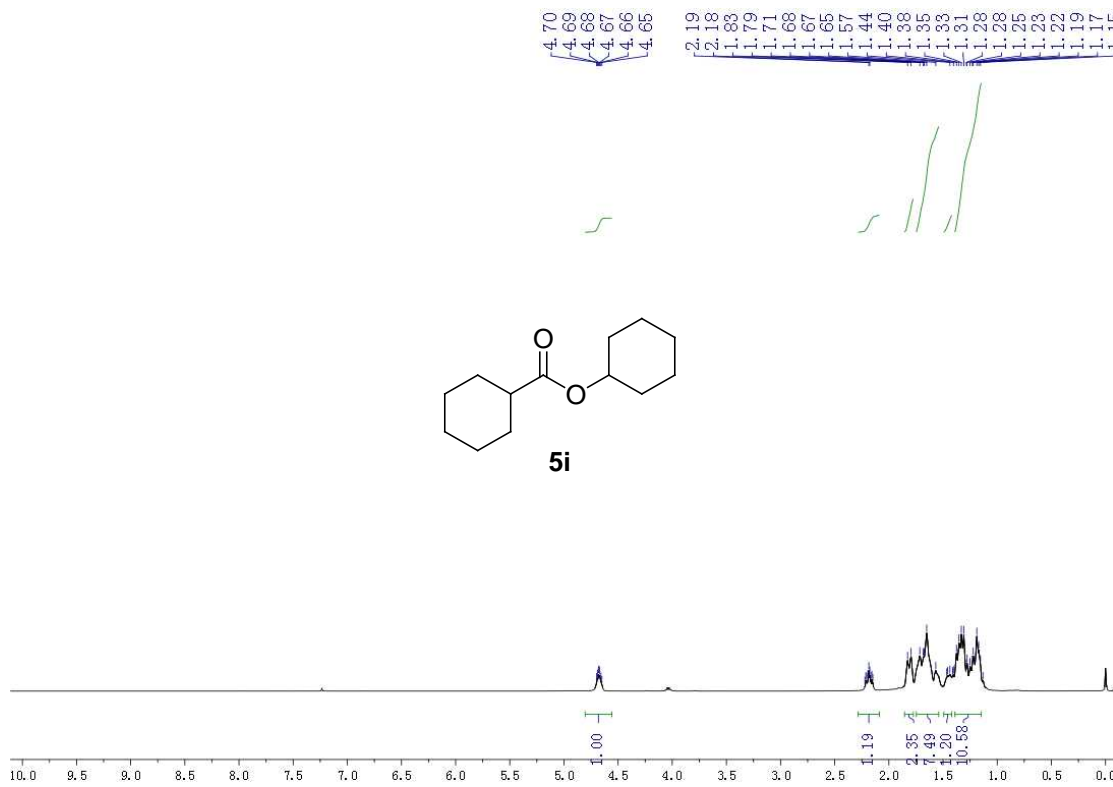



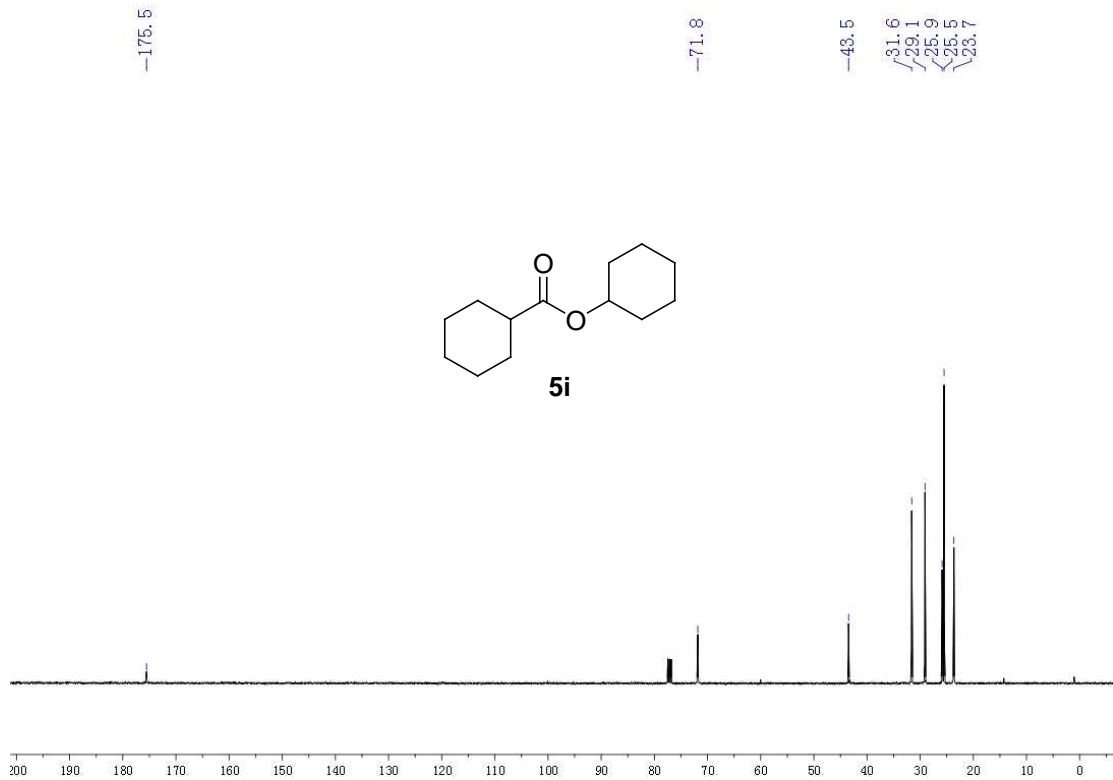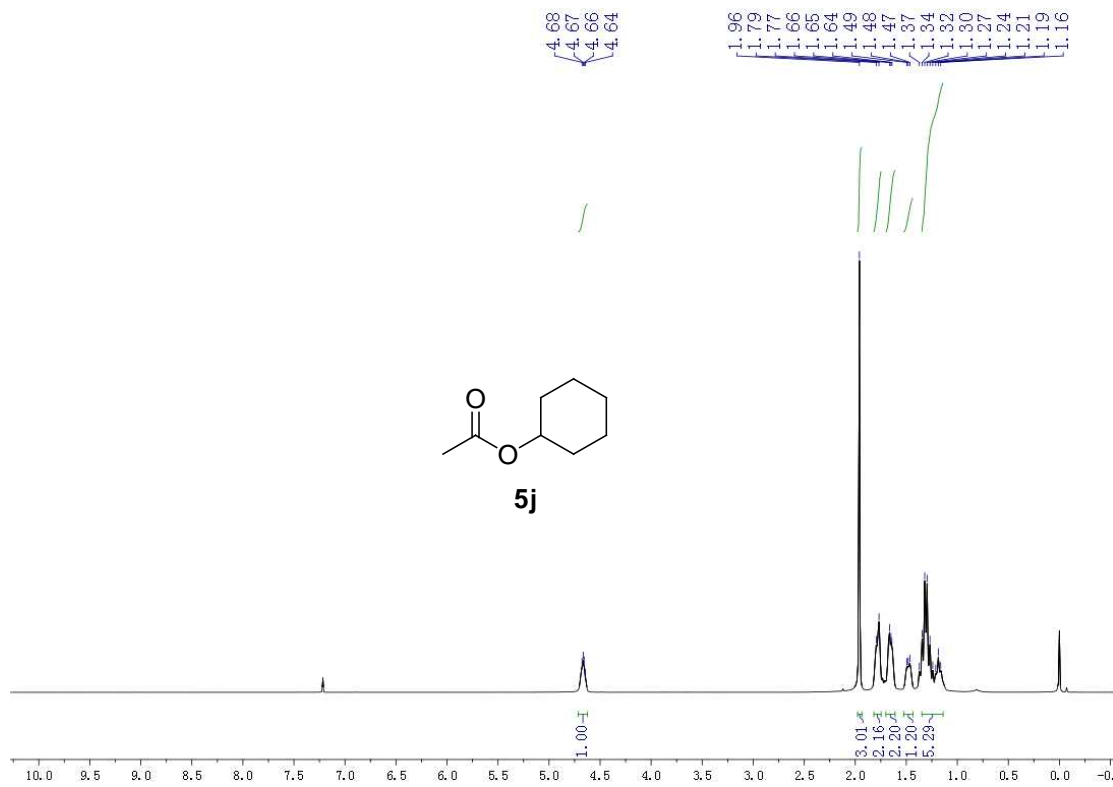

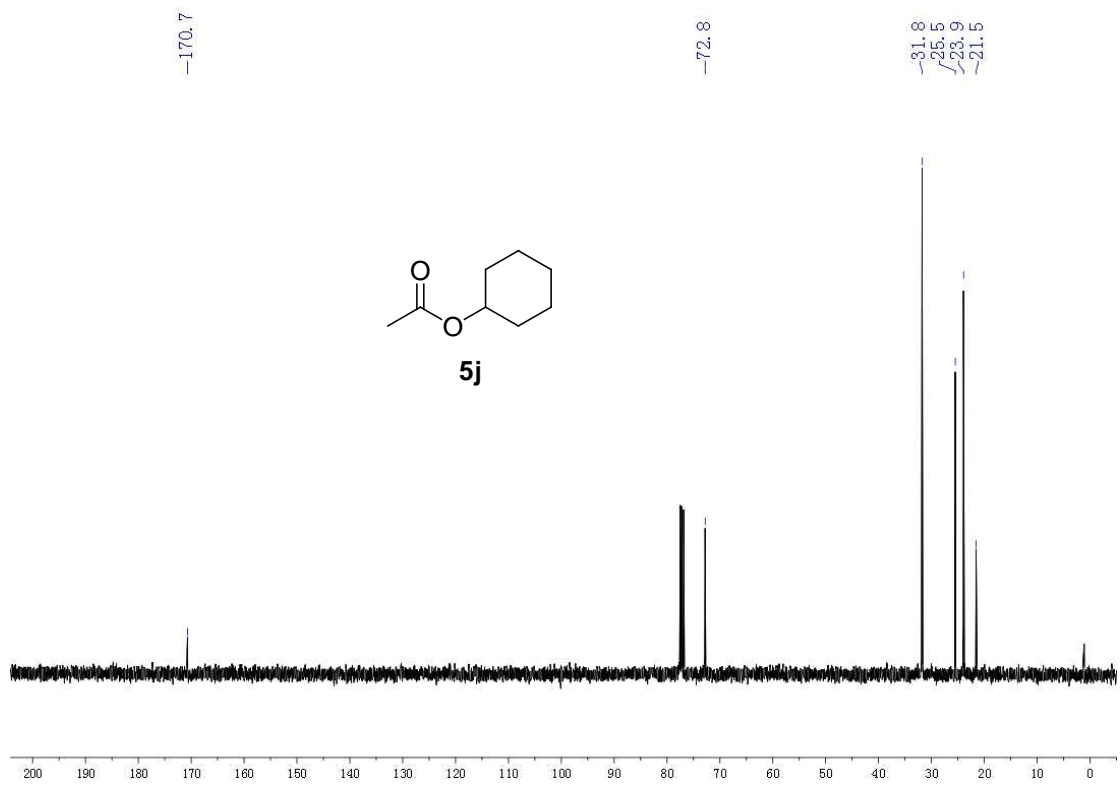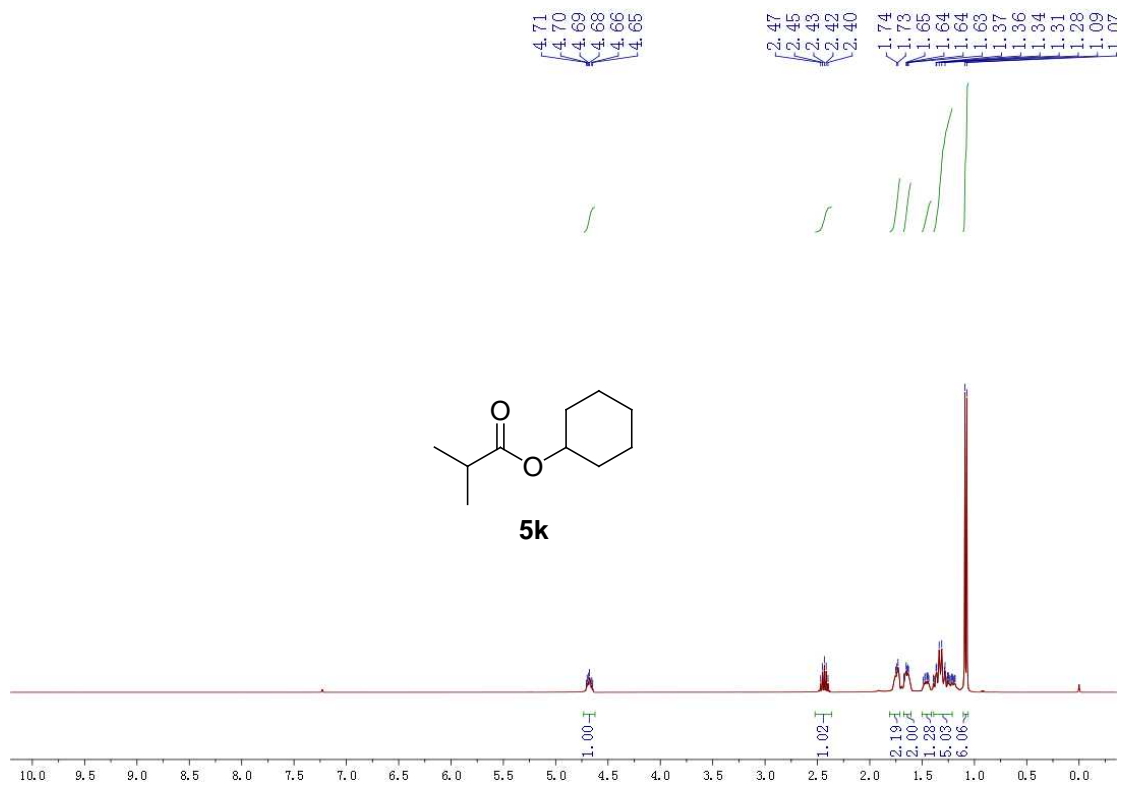

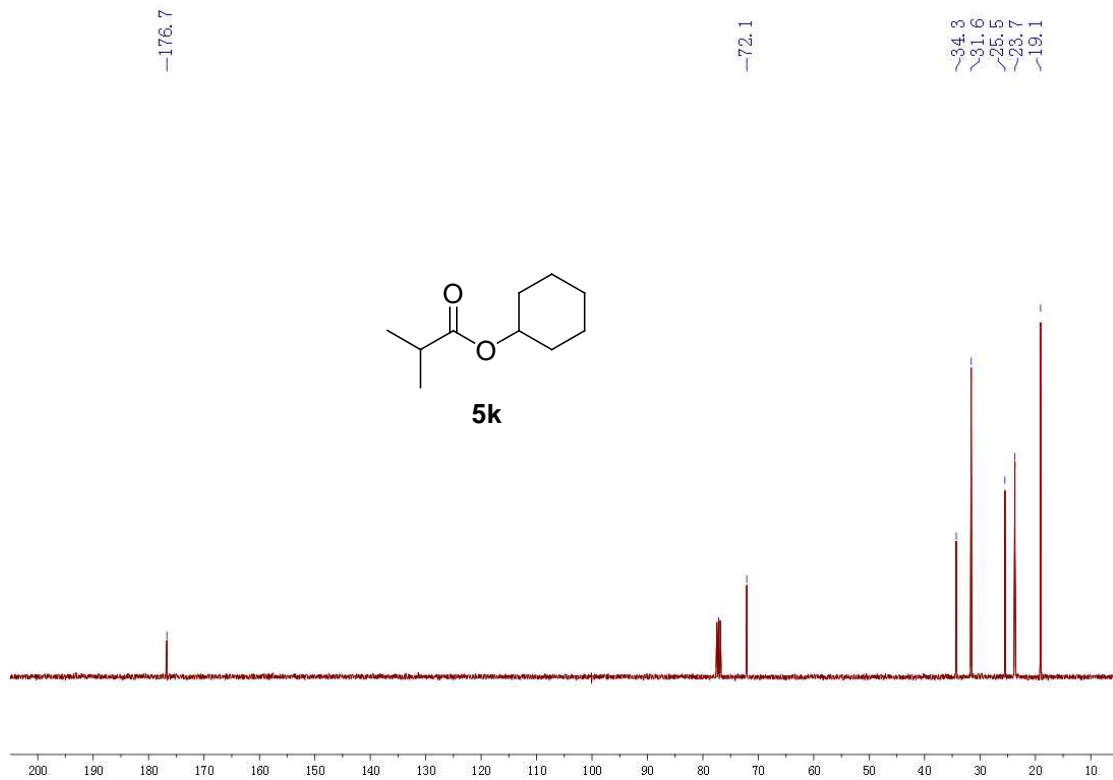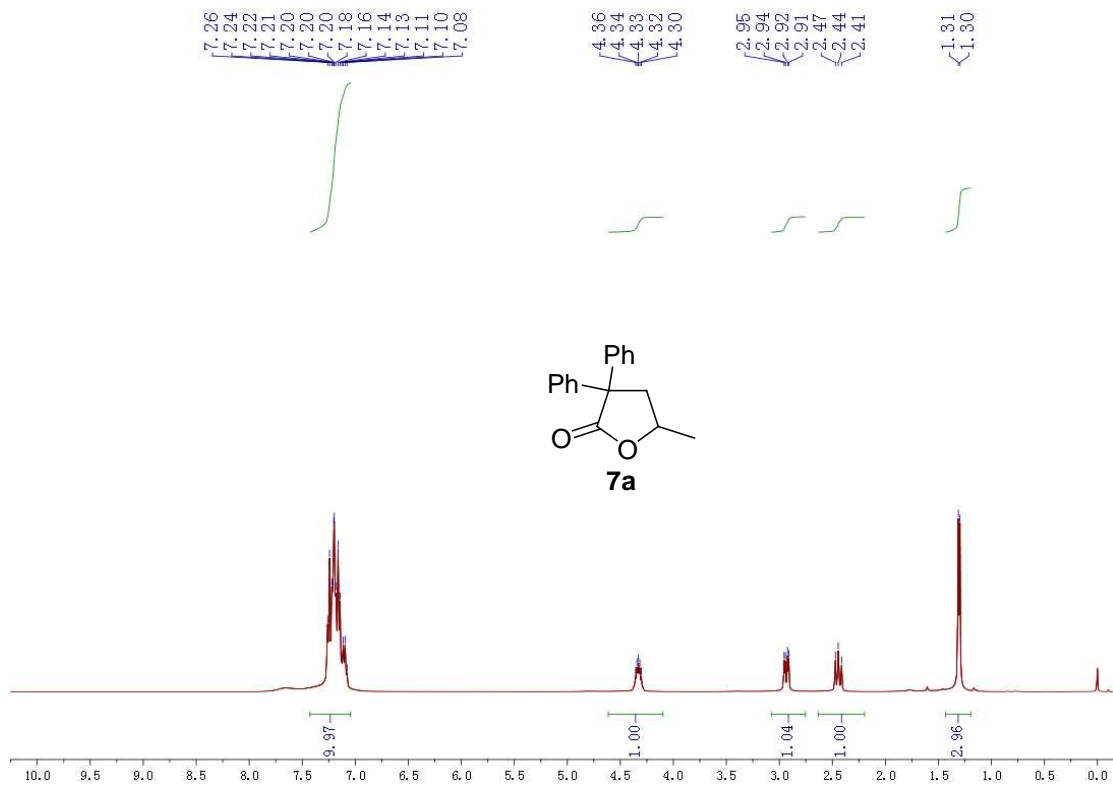

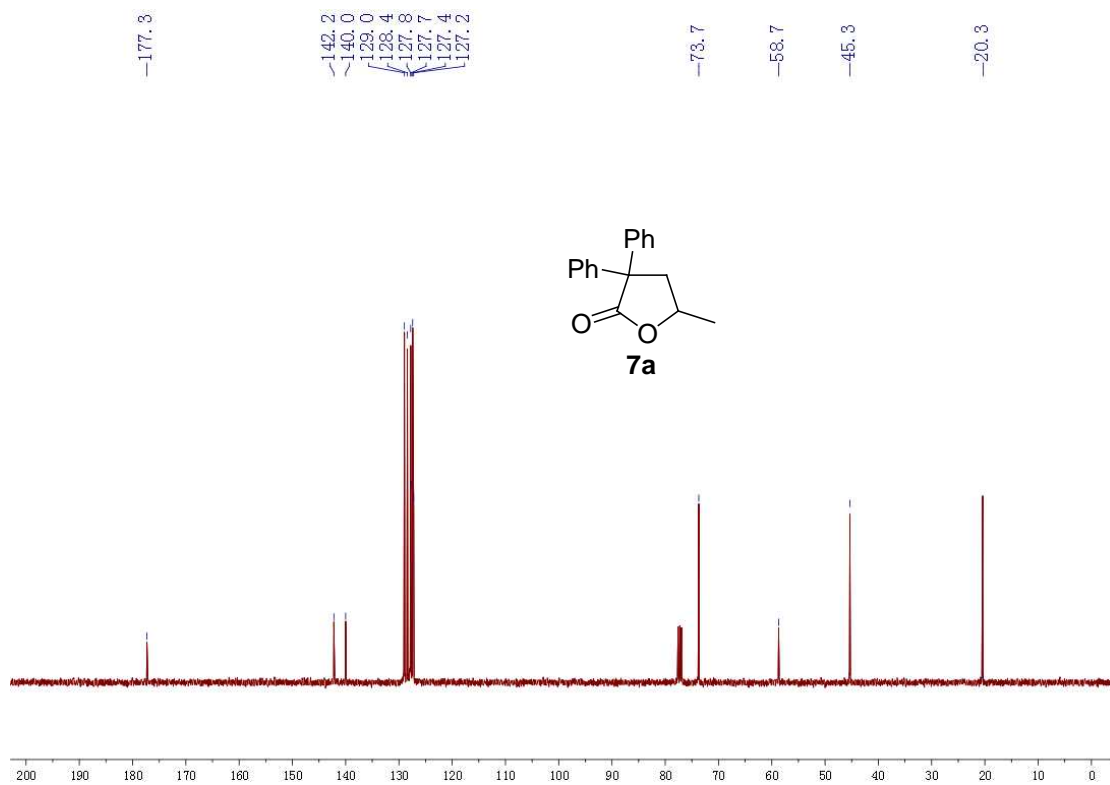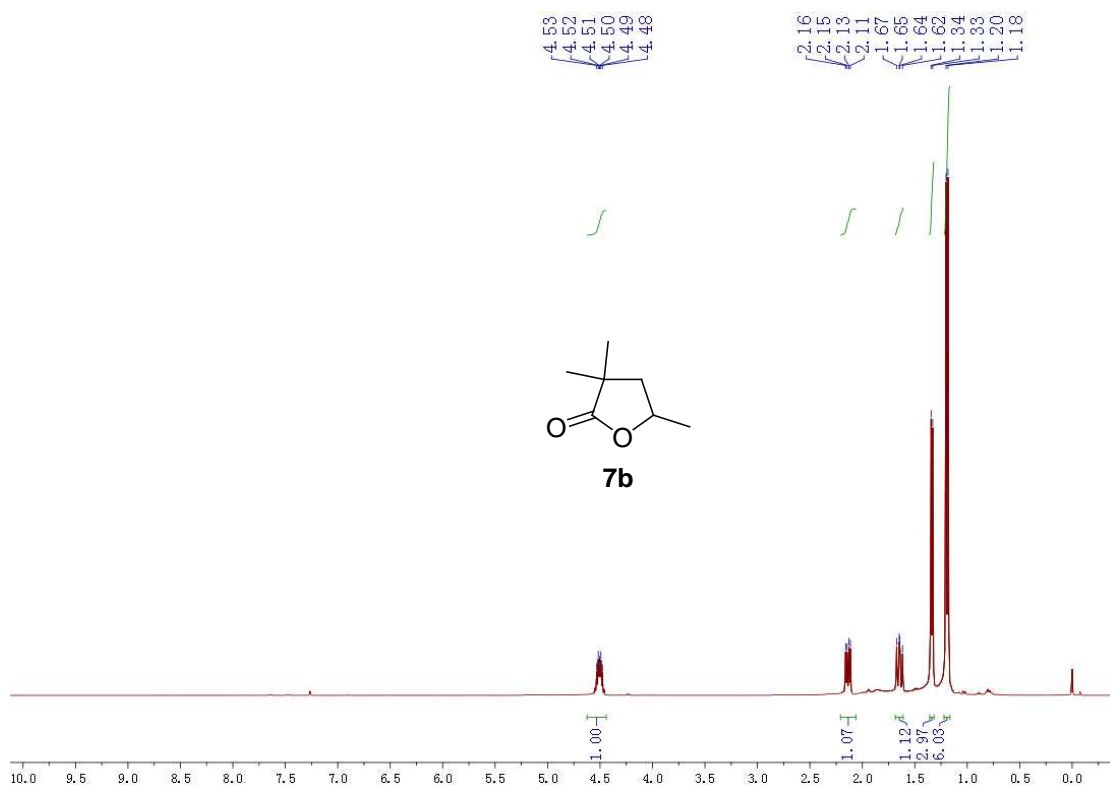

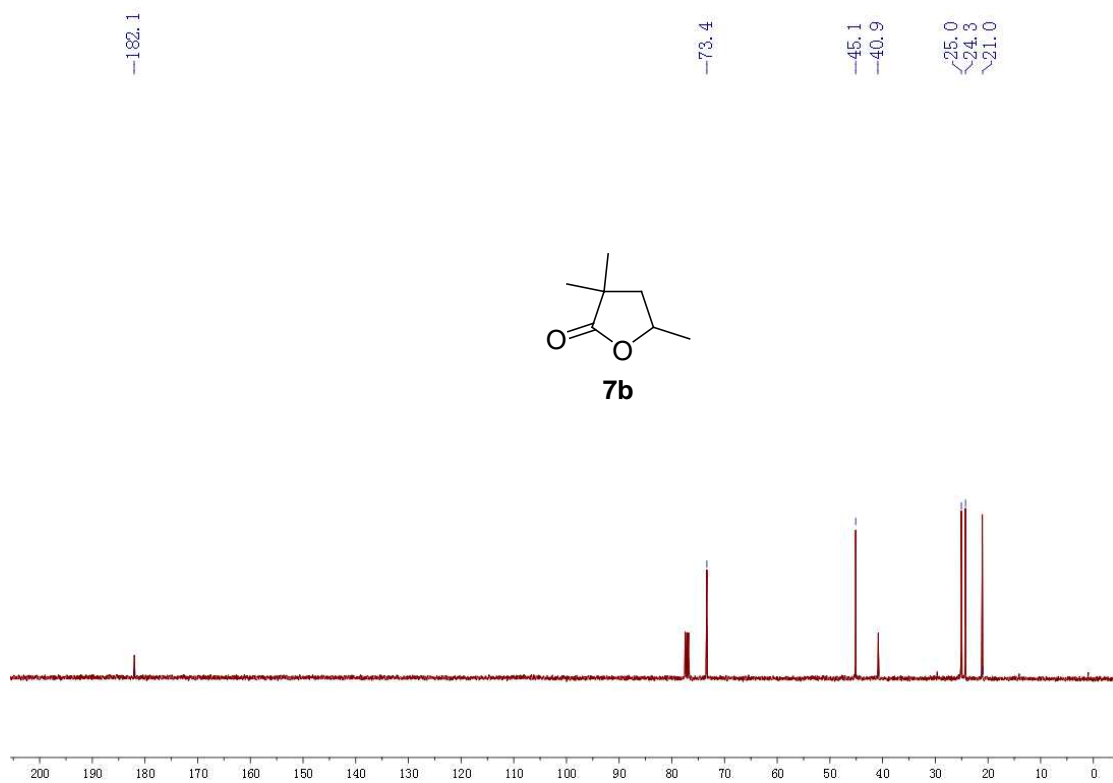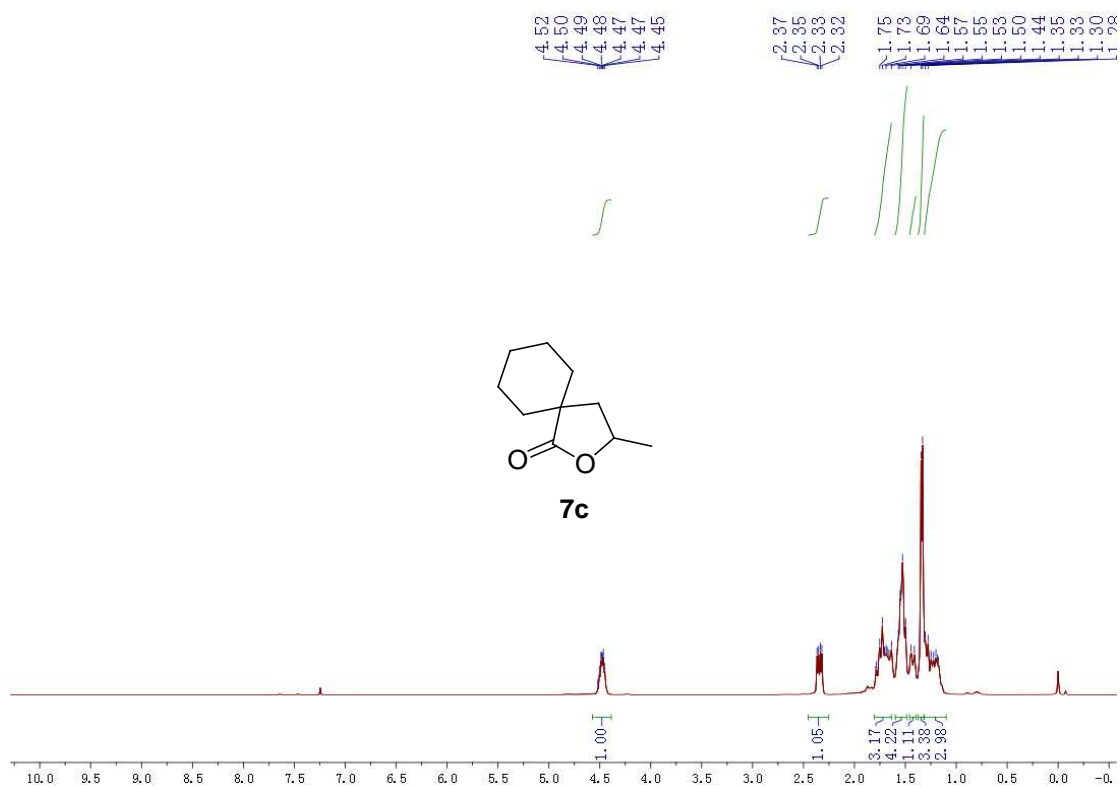

-181.6

-73.7

45.4  
41.2  
34.4  
31.5  
25.4  
22.2  
22.1  
21.4

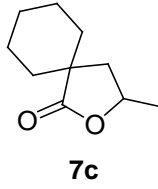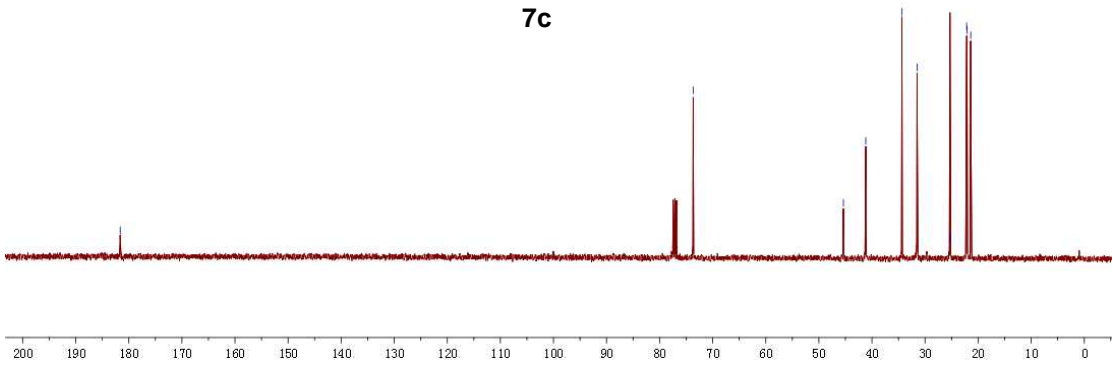

7.25  
7.23  
7.22  
7.21  
7.19  
7.17  
7.15  
7.14  
7.13  
7.08  
7.06

4.38  
4.36  
4.35  
4.34  
4.32  
4.31  
4.29

2.62  
2.60  
2.59  
2.58  
2.52  
2.51  
2.49  
2.47

1.83  
1.81  
1.81  
1.80  
1.79  
1.78  
1.60  
1.59  
1.58  
1.57  
1.55  
1.55  
1.51

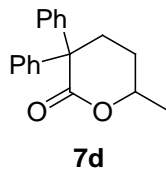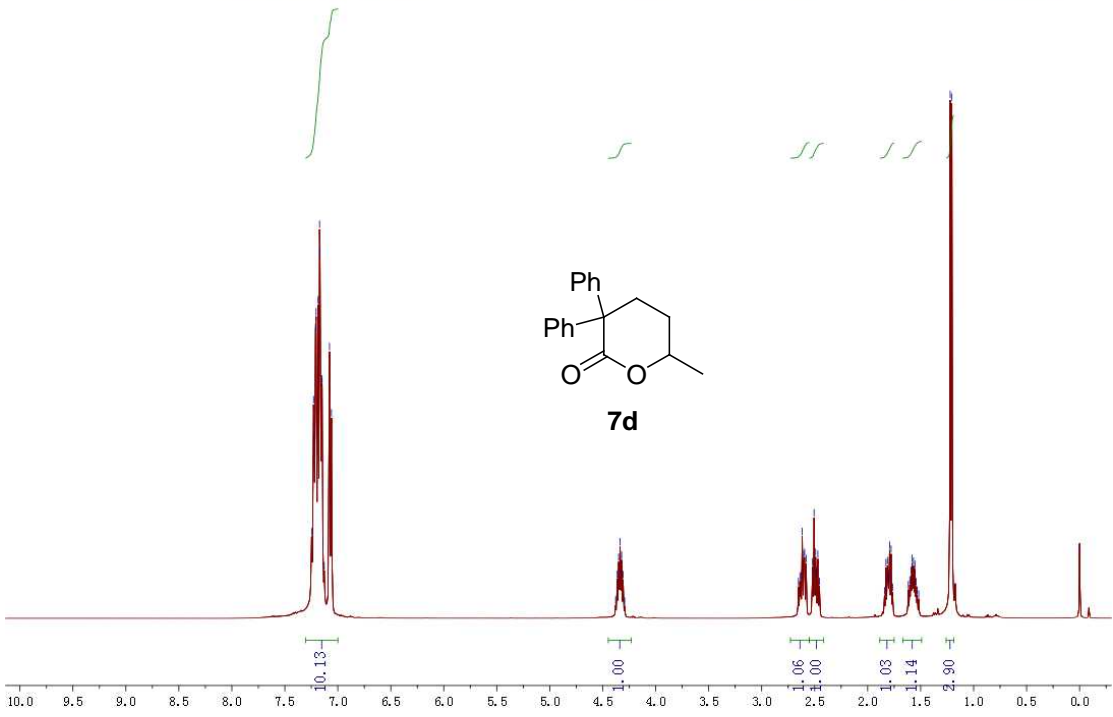

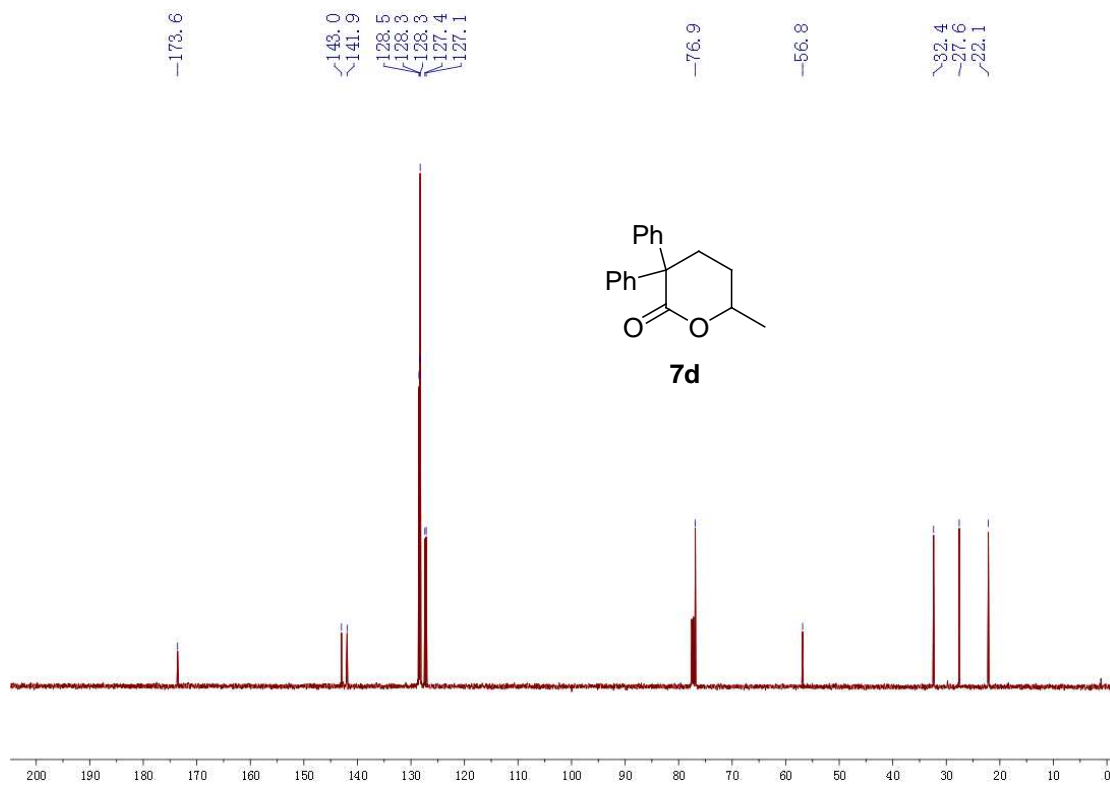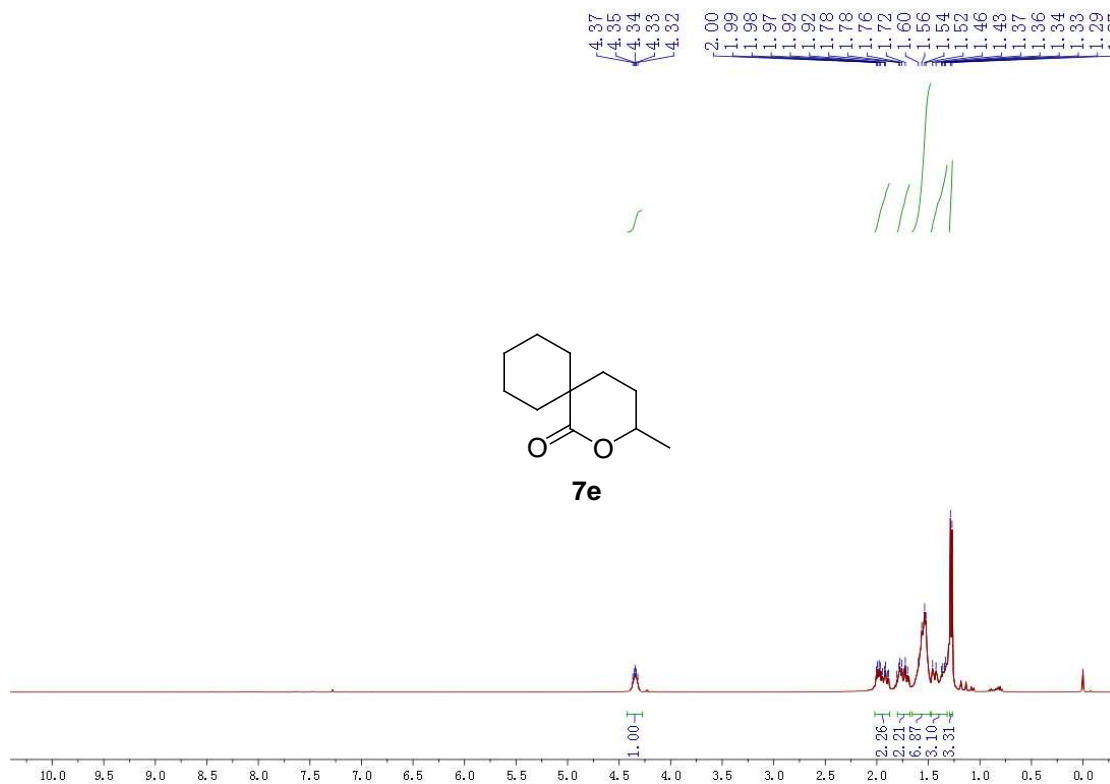

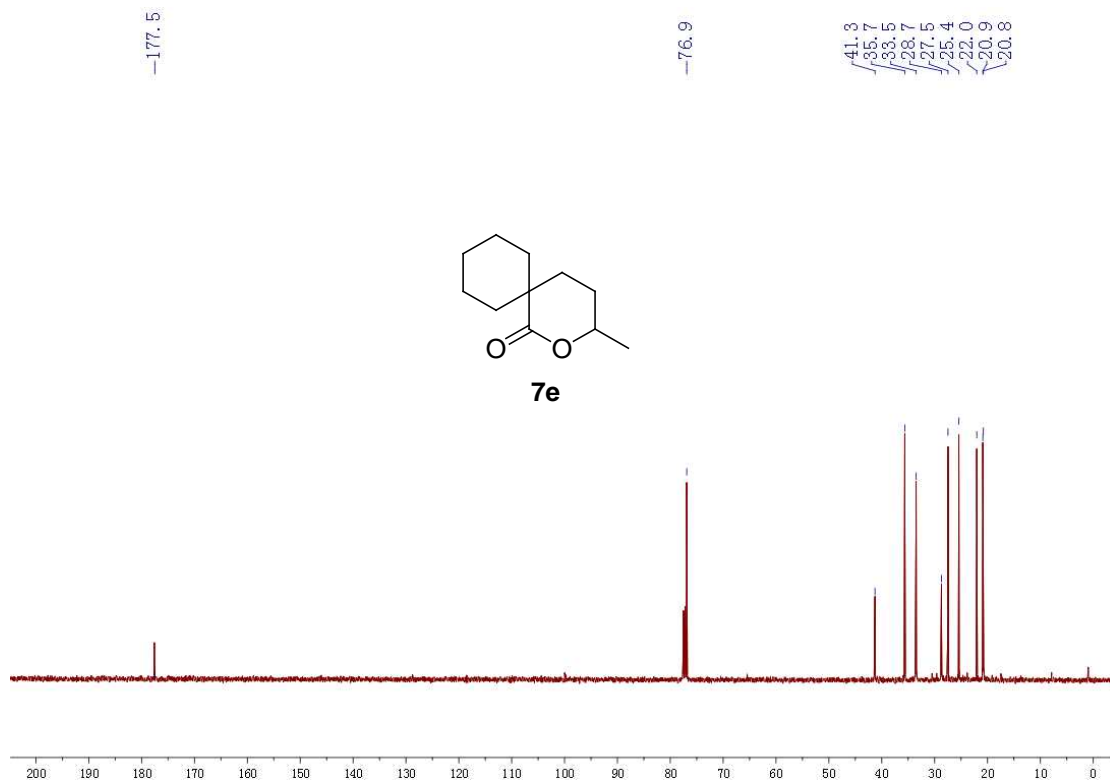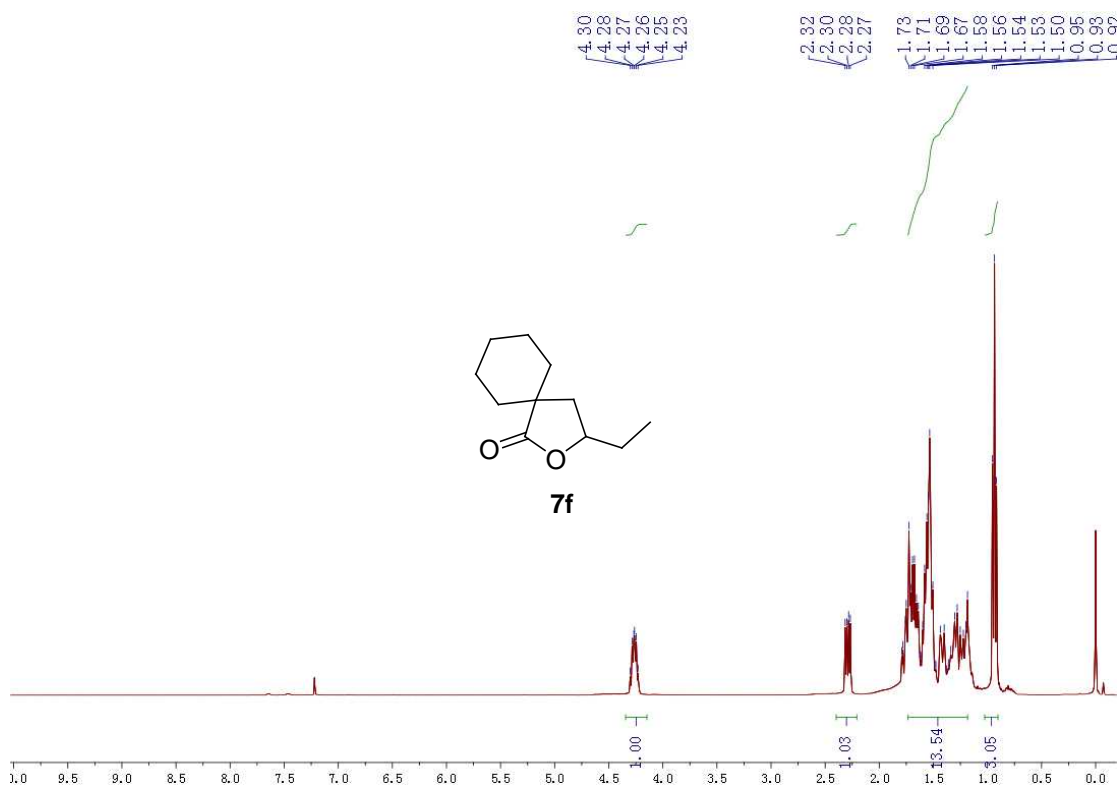



-181.6

-78.6

44.9  
39.0  
34.3  
31.6  
28.9  
25.3  
22.1  
22.1

-9.5

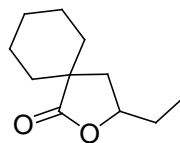

7f

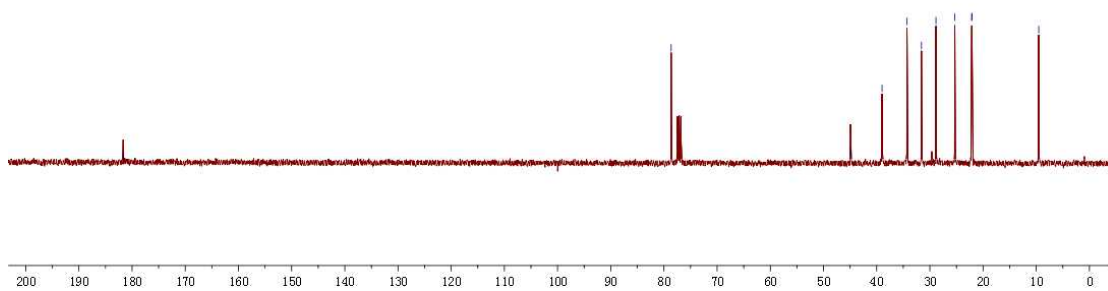

4.04  
4.02  
4.01  
4.00  
3.98

2.24  
2.23  
2.21  
2.20

1.75  
1.75  
1.73  
1.71  
1.69  
1.58  
1.55  
0.97  
0.96  
0.87

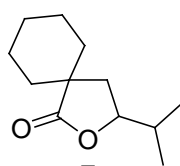

7g

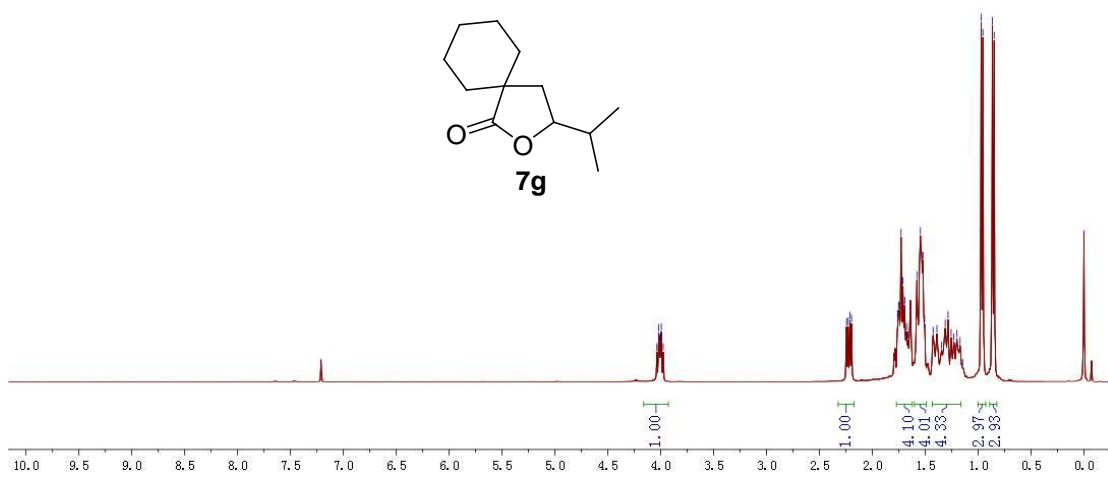

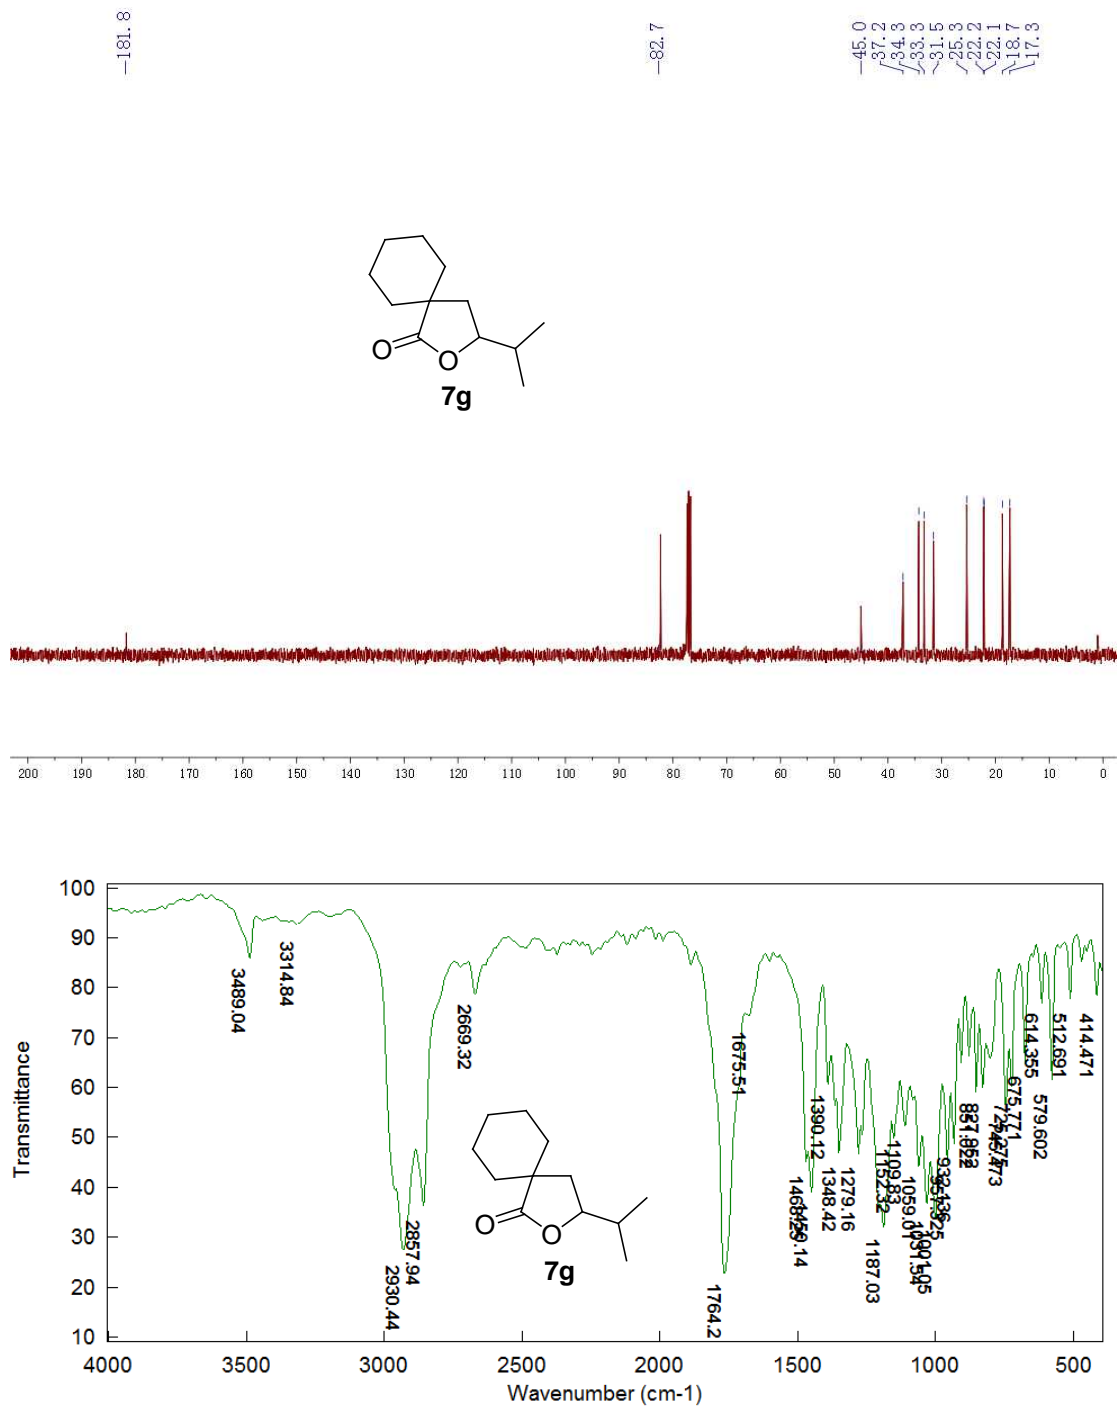

#### 4. X-ray crystal structure and data of compound **2h**

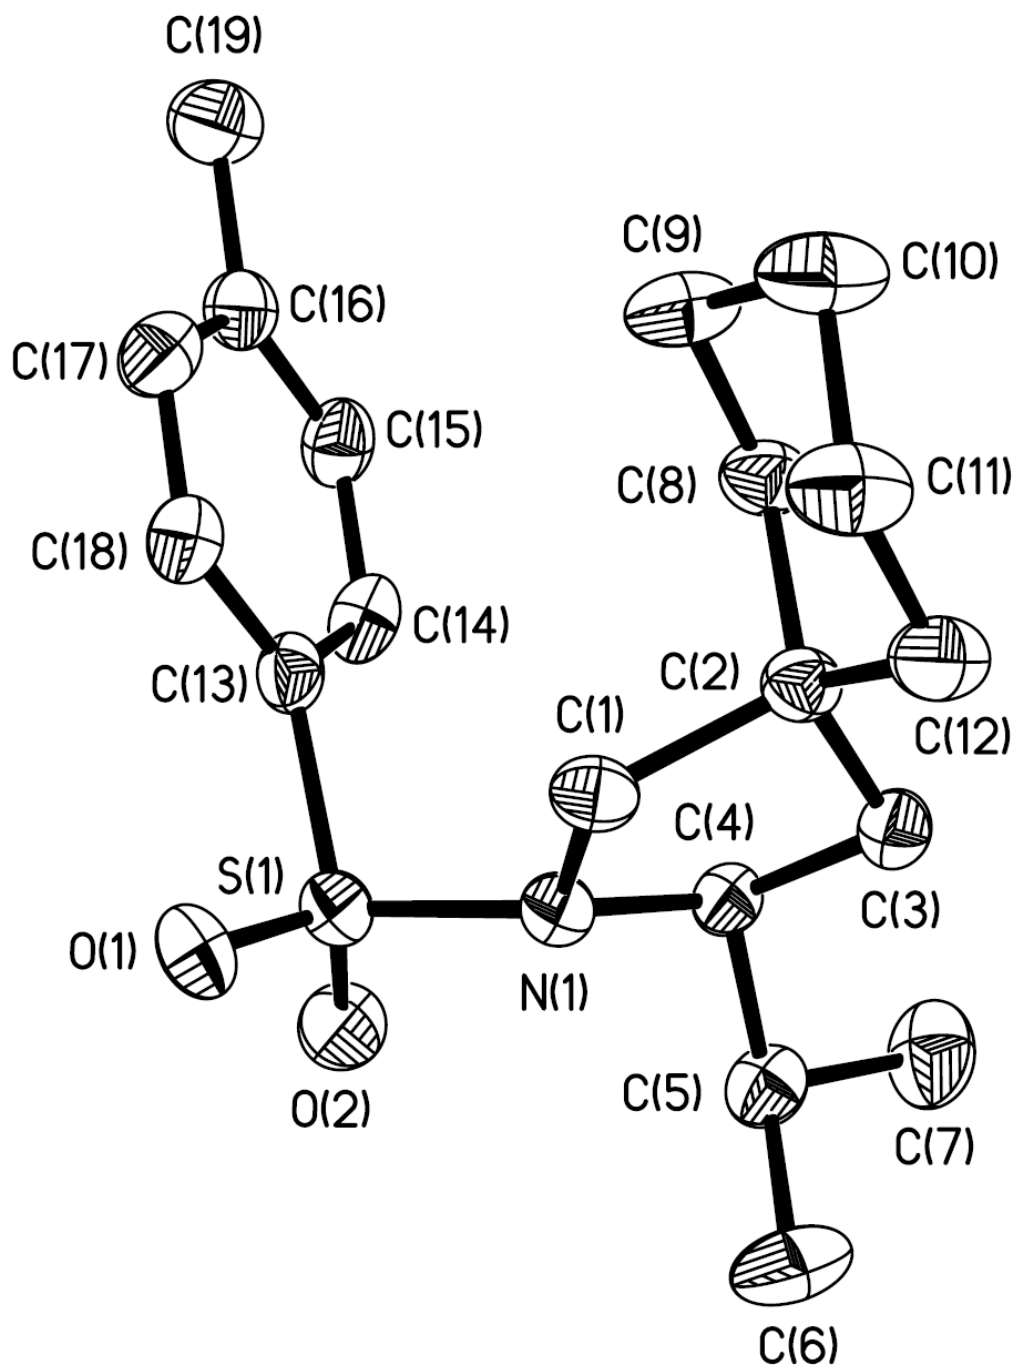

Figure 1. ORTEP drawing of **2h** Hydrogen atoms were omitted for clarity.

Table 1. Crystal data and structure refinement for **2h**.

|                     |                                                    |
|---------------------|----------------------------------------------------|
| Identification code | r141014a1                                          |
| Empirical formula   | C <sub>19</sub> H <sub>29</sub> N O <sub>2</sub> S |
| Formula weight      | 335.49                                             |
|                     | 58                                                 |

|                                   |                                                                                                                |
|-----------------------------------|----------------------------------------------------------------------------------------------------------------|
| Temperature                       | 293(2) K                                                                                                       |
| Wavelength                        | 0.71073 Å                                                                                                      |
| Crystal system, space group       | Orthorhombic, Pna2(1)                                                                                          |
| Unit cell dimensions              | a = 9.2889(19) Å    alpha = 90 deg.<br>b = 17.158(3) Å    beta = 90 deg.<br>c = 11.652(2) Å    gamma = 90 deg. |
| Volume                            | 1857.1(6) Å <sup>3</sup>                                                                                       |
| Z, Calculated density             | 4, 1.200 Mg/m <sup>3</sup>                                                                                     |
| Absorption coefficient            | 0.184 mm <sup>-1</sup>                                                                                         |
| F(000)                            | 728                                                                                                            |
| Crystal size                      | 0.20 x 0.18 x 0.12 mm                                                                                          |
| Theta range for data collection   | 2.11 to 27.88 deg.                                                                                             |
| Limiting indices                  | -12 ≤ h ≤ 11, -15 ≤ k ≤ 22, -15 ≤ l ≤ 15                                                                       |
| Reflections collected / unique    | 17703 / 4426 [R(int) = 0.0518]                                                                                 |
| Completeness to theta = 27.88     | 100.0 %                                                                                                        |
| Absorption correction             | Semi-empirical from equivalents                                                                                |
| Max. and min. transmission        | 0.9783 and 0.9642                                                                                              |
| Refinement method                 | Full-matrix least-squares on F <sup>2</sup>                                                                    |
| Data / restraints / parameters    | 4426 / 1 / 212                                                                                                 |
| Goodness-of-fit on F <sup>2</sup> | 0.979                                                                                                          |
| Final R indices [I > 2σ(I)]       | R1 = 0.0441, wR2 = 0.0986                                                                                      |
| R indices (all data)              | R1 = 0.0585, wR2 = 0.1084                                                                                      |
| Absolute structure parameter      | 0.00(7)                                                                                                        |
| Extinction coefficient            | 0.074(3)                                                                                                       |
| Largest diff. peak and hole       | 0.164 and -0.184 e.Å <sup>-3</sup>                                                                             |

Table 2. Atomic coordinates ( x 10<sup>4</sup>) and equivalent isotropic displacement parameters (Å<sup>2</sup> x 10<sup>3</sup>) for **2h**.

U(eq) is defined as one third of the trace of the orthogonalized Uij tensor.

|       | x        | y       | z        | U(eq) |
|-------|----------|---------|----------|-------|
| S(1)  | -815(1)  | 1098(1) | 7108(1)  | 54(1) |
| O(1)  | -1340(2) | 358(1)  | 7503(2)  | 74(1) |
| O(2)  | -1800(2) | 1681(1) | 6731(1)  | 74(1) |
| N(1)  | 273(2)   | 920(1)  | 6047(1)  | 46(1) |
| C(1)  | 1348(2)  | 291(1)  | 6218(2)  | 47(1) |
| C(2)  | 2751(2)  | 597(1)  | 5682(2)  | 45(1) |
| C(3)  | 2167(2)  | 1159(1) | 4784(2)  | 50(1) |
| C(4)  | 861(2)   | 1555(1) | 5320(2)  | 44(1) |
| C(5)  | -232(3)  | 1891(1) | 4457(2)  | 56(1) |
| C(6)  | -934(3)  | 1278(2) | 3716(3)  | 85(1) |
| C(7)  | 510(4)   | 2521(2) | 3753(3)  | 85(1) |
| C(8)  | 3669(2)  | 1024(1) | 6576(2)  | 55(1) |
| C(9)  | 4373(3)  | 485(1)  | 7445(2)  | 67(1) |
| C(10) | 5231(3)  | -157(2) | 6857(3)  | 77(1) |
| C(11) | 4284(3)  | -600(1) | 6021(2)  | 69(1) |
| C(12) | 3632(2)  | -54(1)  | 5142(2)  | 60(1) |
| C(13) | 225(2)   | 1494(1) | 8227(2)  | 48(1) |
| C(14) | 613(2)   | 2278(1) | 8207(2)  | 57(1) |
| C(15) | 1507(3)  | 2569(1) | 9058(2)  | 60(1) |
| C(16) | 2021(2)  | 2103(1) | 9926(2)  | 57(1) |
| C(17) | 1613(3)  | 1328(1) | 9944(2)  | 60(1) |
| C(18) | 730(2)   | 1025(1) | 9100(2)  | 55(1) |
| C(19) | 2991(3)  | 2423(2) | 10838(2) | 80(1) |

Table 3. Bond lengths [Å] and angles [deg] for **2h**.

|            |            |
|------------|------------|
| S(1)-O(2)  | 1.4250(16) |
| S(1)-O(1)  | 1.4366(17) |
| S(1)-N(1)  | 1.6249(17) |
| S(1)-C(13) | 1.760(2)   |
| N(1)-C(1)  | 1.483(3)   |
| N(1)-C(4)  | 1.486(3)   |
| C(1)-C(2)  | 1.538(3)   |
| C(1)-H(1A) | 0.9700     |
| C(1)-H(1B) | 0.9700     |
| C(2)-C(12) | 1.520(3)   |
| C(2)-C(3)  | 1.522(3)   |
| C(2)-C(8)  | 1.533(3)   |
| C(3)-C(4)  | 1.525(3)   |
| C(3)-H(3A) | 0.9700     |
| C(3)-H(3B) | 0.9700     |
| C(4)-C(5)  | 1.540(3)   |
| C(4)-H(4)  | 0.9800     |
| C(5)-C(6)  | 1.509(3)   |
| C(5)-C(7)  | 1.523(4)   |
| C(5)-H(5)  | 0.9800     |
| C(6)-H(6A) | 0.9600     |
| C(6)-H(6B) | 0.9600     |
| C(6)-H(6C) | 0.9600     |
| C(7)-H(7A) | 0.9600     |
| C(7)-H(7B) | 0.9600     |
| C(7)-H(7C) | 0.9600     |
| C(8)-C(9)  | 1.519(3)   |
| C(8)-H(8A) | 0.9700     |
| C(8)-H(8B) | 0.9700     |

|                 |            |
|-----------------|------------|
| C(9)-C(10)      | 1.523(3)   |
| C(9)-H(9A)      | 0.9700     |
| C(9)-H(9B)      | 0.9700     |
| C(10)-C(11)     | 1.516(3)   |
| C(10)-H(10A)    | 0.9700     |
| C(10)-H(10B)    | 0.9700     |
| C(11)-C(12)     | 1.514(3)   |
| C(11)-H(11A)    | 0.9700     |
| C(11)-H(11B)    | 0.9700     |
| C(12)-H(12A)    | 0.9700     |
| C(12)-H(12B)    | 0.9700     |
| C(13)-C(18)     | 1.379(3)   |
| C(13)-C(14)     | 1.392(3)   |
| C(14)-C(15)     | 1.387(3)   |
| C(14)-H(14)     | 0.9300     |
| C(15)-C(16)     | 1.375(3)   |
| C(15)-H(15)     | 0.9300     |
| C(16)-C(17)     | 1.384(3)   |
| C(16)-C(19)     | 1.498(4)   |
| C(17)-C(18)     | 1.382(3)   |
| C(17)-H(17)     | 0.9300     |
| C(18)-H(18)     | 0.9300     |
| C(19)-H(19A)    | 0.9600     |
| C(19)-H(19B)    | 0.9600     |
| C(19)-H(19C)    | 0.9600     |
| O(2)-S(1)-O(1)  | 120.10(10) |
| O(2)-S(1)-N(1)  | 107.27(10) |
| O(1)-S(1)-N(1)  | 106.75(10) |
| O(2)-S(1)-C(13) | 108.03(11) |

|                  |            |
|------------------|------------|
| O(1)-S(1)-C(13)  | 106.87(11) |
| N(1)-S(1)-C(13)  | 107.20(8)  |
| C(1)-N(1)-C(4)   | 111.27(15) |
| C(1)-N(1)-S(1)   | 116.98(14) |
| C(4)-N(1)-S(1)   | 121.59(14) |
| N(1)-C(1)-C(2)   | 105.57(15) |
| N(1)-C(1)-H(1A)  | 110.6      |
| C(2)-C(1)-H(1A)  | 110.6      |
| N(1)-C(1)-H(1B)  | 110.6      |
| C(2)-C(1)-H(1B)  | 110.6      |
| H(1A)-C(1)-H(1B) | 108.8      |
| C(12)-C(2)-C(3)  | 111.89(18) |
| C(12)-C(2)-C(8)  | 109.41(16) |
| C(3)-C(2)-C(8)   | 111.31(17) |
| C(12)-C(2)-C(1)  | 111.93(17) |
| C(3)-C(2)-C(1)   | 101.13(16) |
| C(8)-C(2)-C(1)   | 111.00(18) |
| C(2)-C(3)-C(4)   | 106.54(17) |
| C(2)-C(3)-H(3A)  | 110.4      |
| C(4)-C(3)-H(3A)  | 110.4      |
| C(2)-C(3)-H(3B)  | 110.4      |
| C(4)-C(3)-H(3B)  | 110.4      |
| H(3A)-C(3)-H(3B) | 108.6      |
| N(1)-C(4)-C(3)   | 101.44(16) |
| N(1)-C(4)-C(5)   | 113.86(16) |
| C(3)-C(4)-C(5)   | 115.09(17) |
| N(1)-C(4)-H(4)   | 108.7      |
| C(3)-C(4)-H(4)   | 108.7      |
| C(5)-C(4)-H(4)   | 108.7      |



|                  |            |
|------------------|------------|
| C(6)-C(5)-C(7)   | 112.4(2)   |
| C(6)-C(5)-C(4)   | 113.47(18) |
| C(7)-C(5)-C(4)   | 108.6(2)   |
| C(6)-C(5)-H(5)   | 107.3      |
| C(7)-C(5)-H(5)   | 107.3      |
| C(4)-C(5)-H(5)   | 107.3      |
| C(5)-C(6)-H(6A)  | 109.5      |
| C(5)-C(6)-H(6B)  | 109.5      |
| H(6A)-C(6)-H(6B) | 109.5      |
| C(5)-C(6)-H(6C)  | 109.5      |
| H(6A)-C(6)-H(6C) | 109.5      |
| H(6B)-C(6)-H(6C) | 109.5      |
| C(5)-C(7)-H(7A)  | 109.5      |
| C(5)-C(7)-H(7B)  | 109.5      |
| H(7A)-C(7)-H(7B) | 109.5      |
| C(5)-C(7)-H(7C)  | 109.5      |
| H(7A)-C(7)-H(7C) | 109.5      |
| H(7B)-C(7)-H(7C) | 109.5      |
| C(9)-C(8)-C(2)   | 113.72(18) |
| C(9)-C(8)-H(8A)  | 108.8      |
| C(2)-C(8)-H(8A)  | 108.8      |
| C(9)-C(8)-H(8B)  | 108.8      |
| C(2)-C(8)-H(8B)  | 108.8      |
| H(8A)-C(8)-H(8B) | 107.7      |
| C(8)-C(9)-C(10)  | 111.4(2)   |
| C(8)-C(9)-H(9A)  | 109.3      |
| C(10)-C(9)-H(9A) | 109.3      |
| C(8)-C(9)-H(9B)  | 109.3      |
| C(10)-C(9)-H(9B) | 109.3      |

|                     |            |
|---------------------|------------|
| H(9A)-C(9)-H(9B)    | 108.0      |
| C(11)-C(10)-C(9)    | 110.40(19) |
| C(11)-C(10)-H(10A)  | 109.6      |
| C(9)-C(10)-H(10A)   | 109.6      |
| C(11)-C(10)-H(10B)  | 109.6      |
| C(9)-C(10)-H(10B)   | 109.6      |
| H(10A)-C(10)-H(10B) | 108.1      |
| C(12)-C(11)-C(10)   | 110.8(2)   |
| C(12)-C(11)-H(11A)  | 109.5      |
| C(10)-C(11)-H(11A)  | 109.5      |
| C(12)-C(11)-H(11B)  | 109.5      |
| C(10)-C(11)-H(11B)  | 109.5      |
| H(11A)-C(11)-H(11B) | 108.1      |
| C(11)-C(12)-C(2)    | 113.0(2)   |
| C(11)-C(12)-H(12A)  | 109.0      |
| C(2)-C(12)-H(12A)   | 109.0      |
| C(11)-C(12)-H(12B)  | 109.0      |
| C(2)-C(12)-H(12B)   | 109.0      |
| H(12A)-C(12)-H(12B) | 107.8      |
| C(18)-C(13)-C(14)   | 119.2(2)   |
| C(18)-C(13)-S(1)    | 120.50(17) |
| C(14)-C(13)-S(1)    | 120.16(17) |
| C(15)-C(14)-C(13)   | 119.4(2)   |
| C(15)-C(14)-H(14)   | 120.3      |
| C(13)-C(14)-H(14)   | 120.3      |
| C(16)-C(15)-C(14)   | 121.7(2)   |
| C(16)-C(15)-H(15)   | 119.2      |
| C(14)-C(15)-H(15)   | 119.2      |
| C(15)-C(16)-C(17)   | 118.4(2)   |

|                     |          |
|---------------------|----------|
| C(15)-C(16)-C(19)   | 121.2(2) |
| C(17)-C(16)-C(19)   | 120.4(2) |
| C(18)-C(17)-C(16)   | 120.8(2) |
| C(18)-C(17)-H(17)   | 119.6    |
| C(16)-C(17)-H(17)   | 119.6    |
| C(13)-C(18)-C(17)   | 120.5(2) |
| C(13)-C(18)-H(18)   | 119.7    |
| C(17)-C(18)-H(18)   | 119.7    |
| C(16)-C(19)-H(19A)  | 109.5    |
| C(16)-C(19)-H(19B)  | 109.5    |
| H(19A)-C(19)-H(19B) | 109.5    |
| C(16)-C(19)-H(19C)  | 109.5    |
| H(19A)-C(19)-H(19C) | 109.5    |
| H(19B)-C(19)-H(19C) | 109.5    |

---

Symmetry transformations used to generate equivalent atoms:

Table 4. Anisotropic displacement parameters ( $\text{Å}^2 \times 10^3$ ) for **2h**.

The anisotropic displacement factor exponent takes the form:

$$-2 \pi^2 [ h^2 a^{*2} U_{11} + \dots + 2 h k a^* b^* U_{12} ]$$

---

|      | U11   | U22    | U33   | U23   | U13   | U12    |
|------|-------|--------|-------|-------|-------|--------|
| S(1) | 40(1) | 74(1)  | 50(1) | 3(1)  | 3(1)  | 1(1)   |
| O(1) | 59(1) | 90(1)  | 73(1) | 10(1) | 9(1)  | -29(1) |
| O(2) | 49(1) | 107(1) | 66(1) | 0(1)  | 2(1)  | 32(1)  |
| N(1) | 41(1) | 51(1)  | 45(1) | 2(1)  | 0(1)  | 1(1)   |
| C(1) | 45(1) | 43(1)  | 54(1) | -3(1) | -7(1) | 2(1)   |
| C(2) | 43(1) | 46(1)  | 45(1) | -6(1) | -3(1) | 1(1)   |
| C(3) | 50(1) | 59(1)  | 43(1) | -1(1) | 3(1)  | 3(1)   |

|       |       |        |       |        |        |       |
|-------|-------|--------|-------|--------|--------|-------|
| C(4)  | 47(1) | 47(1)  | 38(1) | -1(1)  | 0(1)   | 1(1)  |
| C(5)  | 63(1) | 53(1)  | 52(1) | 4(1)   | -3(1)  | 13(1) |
| C(6)  | 93(2) | 87(2)  | 73(2) | -13(2) | -40(2) | 20(2) |
| C(7)  | 95(2) | 83(2)  | 77(2) | 29(2)  | 12(2)  | 18(2) |
| C(8)  | 51(1) | 54(1)  | 59(1) | -11(1) | -10(1) | -5(1) |
| C(9)  | 70(1) | 66(1)  | 65(2) | -12(1) | -29(1) | 7(1)  |
| C(10) | 67(2) | 73(2)  | 91(2) | -15(2) | -34(2) | 18(1) |
| C(11) | 65(1) | 58(1)  | 85(2) | -20(1) | -19(1) | 17(1) |
| C(12) | 52(1) | 67(2)  | 62(1) | -21(1) | -8(1)  | 13(1) |
| C(13) | 47(1) | 54(1)  | 44(1) | 3(1)   | 10(1)  | 6(1)  |
| C(14) | 73(1) | 53(1)  | 45(1) | 4(1)   | 9(1)   | 11(1) |
| C(15) | 73(2) | 55(1)  | 50(1) | -7(1)  | 11(1)  | -4(1) |
| C(16) | 51(1) | 71(2)  | 48(1) | -12(1) | 8(1)   | 7(1)  |
| C(17) | 68(1) | 64(1)  | 49(1) | 2(1)   | -1(1)  | 11(1) |
| C(18) | 61(1) | 53(1)  | 50(1) | 4(1)   | 6(1)   | 1(1)  |
| C(19) | 67(1) | 101(2) | 70(2) | -27(2) | -2(1)  | 8(2)  |

---

Table 5. Hydrogen coordinates ( $\times 10^4$ ) and isotropic displacement parameters ( $\text{\AA}^2 \times 10^3$ ) for **2h**.

|        | x     | y    | z    | U(eq) |
|--------|-------|------|------|-------|
| H(1A)  | 1040  | -184 | 5840 | 57    |
| H(1B)  | 1480  | 185  | 7029 | 57    |
| H(3A)  | 1890  | 878  | 4095 | 61    |
| H(3B)  | 2892  | 1542 | 4581 | 61    |
| H(4)   | 1195  | 1978 | 5820 | 53    |
| H(5)   | -996  | 2144 | 4902 | 67    |
| H(6A)  | -1624 | 1521 | 3217 | 127   |
| H(6B)  | -1412 | 904  | 4195 | 127   |
| H(6C)  | -213  | 1021 | 3264 | 127   |
| H(7A)  | 1204  | 2285 | 3250 | 127   |
| H(7B)  | 988   | 2880 | 4258 | 127   |
| H(7C)  | -193  | 2796 | 3305 | 127   |
| H(8A)  | 4415  | 1316 | 6183 | 65    |
| H(8B)  | 3066  | 1394 | 6982 | 65    |
| H(9A)  | 3636  | 253  | 7925 | 80    |
| H(9B)  | 5009  | 786  | 7935 | 80    |
| H(10A) | 6038  | 70   | 6448 | 93    |
| H(10B) | 5608  | -513 | 7429 | 93    |
| H(11A) | 4853  | -994 | 5632 | 83    |
| H(11B) | 3521  | -861 | 6439 | 83    |
| H(12A) | 3020  | -351 | 4630 | 72    |
| H(12B) | 4399  | 174  | 4687 | 72    |
| H(14)  | 276   | 2603 | 7627 | 68    |
| H(15)  | 1767  | 3092 | 9040 | 71    |

|        |      |      |       |     |
|--------|------|------|-------|-----|
| H(17)  | 1937 | 1006 | 10532 | 72  |
| H(18)  | 474  | 501  | 9120  | 66  |
| H(19A) | 3352 | 2003 | 11301 | 119 |
| H(19B) | 2462 | 2780 | 11312 | 119 |
| H(19C) | 3783 | 2691 | 10485 | 119 |

---

Table 6. Torsion angles [deg] for **2h**.

---

|                      |             |
|----------------------|-------------|
| O(2)-S(1)-N(1)-C(1)  | -176.40(14) |
| O(1)-S(1)-N(1)-C(1)  | -46.45(16)  |
| C(13)-S(1)-N(1)-C(1) | 67.78(16)   |
| O(2)-S(1)-N(1)-C(4)  | 41.33(17)   |
| O(1)-S(1)-N(1)-C(4)  | 171.28(15)  |
| C(13)-S(1)-N(1)-C(4) | -74.49(17)  |
| C(4)-N(1)-C(1)-C(2)  | 6.8(2)      |
| S(1)-N(1)-C(1)-C(2)  | -139.17(14) |
| N(1)-C(1)-C(2)-C(12) | -146.01(17) |
| N(1)-C(1)-C(2)-C(3)  | -26.8(2)    |
| N(1)-C(1)-C(2)-C(8)  | 91.43(19)   |
| C(12)-C(2)-C(3)-C(4) | 157.07(17)  |
| C(8)-C(2)-C(3)-C(4)  | -80.2(2)    |
| C(1)-C(2)-C(3)-C(4)  | 37.8(2)     |
| C(1)-N(1)-C(4)-C(3)  | 16.1(2)     |
| S(1)-N(1)-C(4)-C(3)  | 160.32(14)  |
| C(1)-N(1)-C(4)-C(5)  | 140.36(17)  |
| S(1)-N(1)-C(4)-C(5)  | -75.5(2)    |
| C(2)-C(3)-C(4)-N(1)  | -33.6(2)    |
| C(2)-C(3)-C(4)-C(5)  | -157.03(17) |
| N(1)-C(4)-C(5)-C(6)  | -53.0(3)    |

|                         |             |
|-------------------------|-------------|
| C(3)-C(4)-C(5)-C(6)     | 63.5(3)     |
| N(1)-C(4)-C(5)-C(7)     | -178.80(19) |
| C(3)-C(4)-C(5)-C(7)     | -62.3(2)    |
| C(12)-C(2)-C(8)-C(9)    | -51.6(3)    |
| C(3)-C(2)-C(8)-C(9)     | -175.74(19) |
| C(1)-C(2)-C(8)-C(9)     | 72.4(2)     |
| C(2)-C(8)-C(9)-C(10)    | 53.4(3)     |
| C(8)-C(9)-C(10)-C(11)   | -55.0(3)    |
| C(9)-C(10)-C(11)-C(12)  | 57.0(3)     |
| C(10)-C(11)-C(12)-C(2)  | -57.7(3)    |
| C(3)-C(2)-C(12)-C(11)   | 177.35(19)  |
| C(8)-C(2)-C(12)-C(11)   | 53.5(2)     |
| C(1)-C(2)-C(12)-C(11)   | -70.0(2)    |
| O(2)-S(1)-C(13)-C(18)   | 148.48(17)  |
| O(1)-S(1)-C(13)-C(18)   | 17.9(2)     |
| N(1)-S(1)-C(13)-C(18)   | -96.21(18)  |
| O(2)-S(1)-C(13)-C(14)   | -35.14(19)  |
| O(1)-S(1)-C(13)-C(14)   | -165.67(17) |
| N(1)-S(1)-C(13)-C(14)   | 80.17(18)   |
| C(18)-C(13)-C(14)-C(15) | 0.5(3)      |
| S(1)-C(13)-C(14)-C(15)  | -175.94(16) |
| C(13)-C(14)-C(15)-C(16) | -0.2(3)     |
| C(14)-C(15)-C(16)-C(17) | -0.6(3)     |
| C(14)-C(15)-C(16)-C(19) | 179.7(2)    |
| C(15)-C(16)-C(17)-C(18) | 1.0(3)      |
| C(19)-C(16)-C(17)-C(18) | -179.3(2)   |
| C(14)-C(13)-C(18)-C(17) | -0.1(3)     |
| S(1)-C(13)-C(18)-C(17)  | 176.35(17)  |
| C(16)-C(17)-C(18)-C(13) | -0.7(3)     |

Symmetry transformations used to generate equivalent atoms:

Table 7. Hydrogen bonds for **2h** [A and deg.].

| D-H...A | d(D-H) | d(H...A) | d(D...A) | <(DHA) |
|---------|--------|----------|----------|--------|
|---------|--------|----------|----------|--------|

## 5. X-ray crystal structure and data of compound **2j**

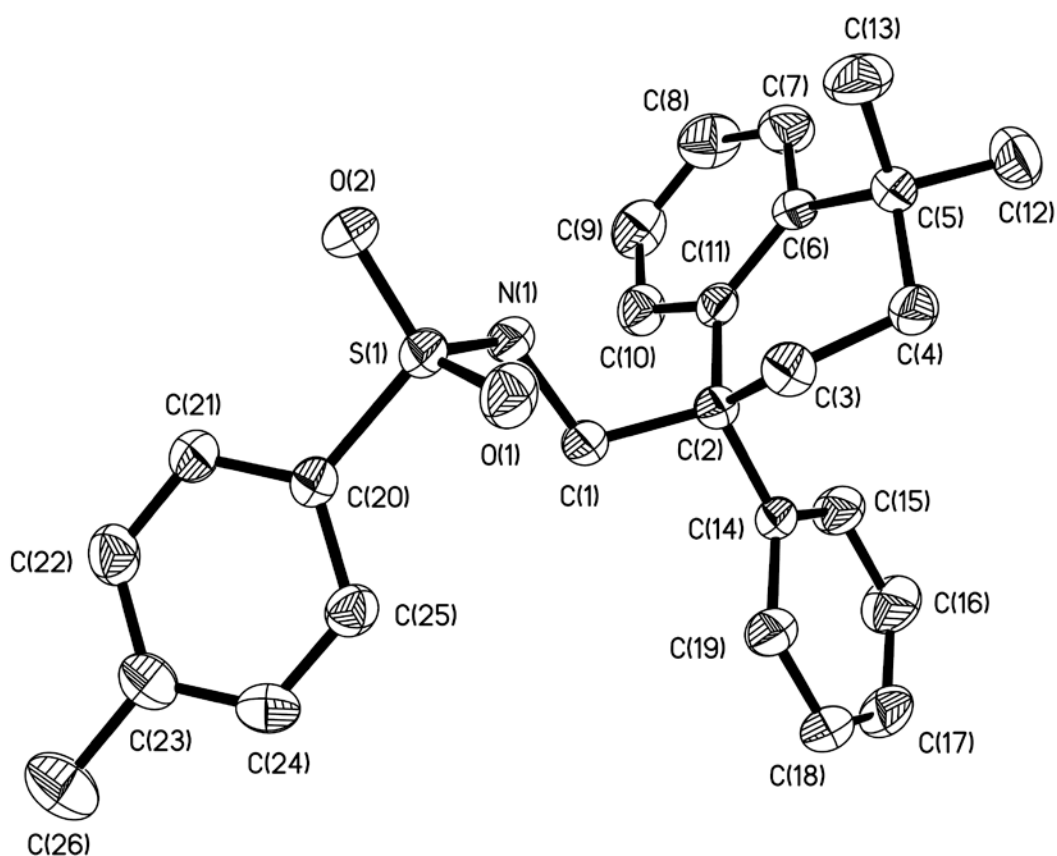

Figure 1. ORTEP drawing of **2j**. Hydrogen atoms were omitted for clarity.

Table 1. Crystal data and structure refinement for **2j**.

|                     |                                                   |
|---------------------|---------------------------------------------------|
| Identification code | shelxl                                            |
| Empirical formula   | C <sub>26</sub> H <sub>29</sub> NO <sub>2</sub> S |
| Formula weight      | 419.56                                            |



|                                   |                                                                                                                                 |
|-----------------------------------|---------------------------------------------------------------------------------------------------------------------------------|
| Temperature                       | 293(2) K                                                                                                                        |
| Wavelength                        | 0.71073 Å                                                                                                                       |
| Crystal system, space group       | Triclinic, P-1                                                                                                                  |
| Unit cell dimensions              | a = 11.089(2) Å    alpha = 80.22(3) deg.<br>b = 13.375(3) Å    beta = 77.60(3) deg.<br>c = 16.281(3) Å    gamma = 77.15(3) deg. |
| Volume                            | 2280.3(8) Å <sup>3</sup>                                                                                                        |
| Z, Calculated density             | 4, 1.222 Mg/m <sup>3</sup>                                                                                                      |
| Absorption coefficient            | 0.164 mm <sup>-1</sup>                                                                                                          |
| F(000)                            | 896                                                                                                                             |
| Crystal size                      | 0.20 x 0.18 x 0.12 mm                                                                                                           |
| Theta range for data collection   | 1.57 to 27.88 deg.                                                                                                              |
| Limiting indices                  | -14 ≤ h ≤ 14, -17 ≤ k ≤ 17, -19 ≤ l ≤ 21                                                                                        |
| Reflections collected / unique    | 28896 / 10801 [R(int) = 0.0359]                                                                                                 |
| Completeness to theta = 27.88     | 99.1 %                                                                                                                          |
| Absorption correction             | Semi-empirical from equivalents                                                                                                 |
| Max. and min. transmission        | 0.9806 and 0.9680                                                                                                               |
| Refinement method                 | Full-matrix least-squares on F <sup>2</sup>                                                                                     |
| Data / restraints / parameters    | 10801 / 2 / 556                                                                                                                 |
| Goodness-of-fit on F <sup>2</sup> | 1.018                                                                                                                           |
| Final R indices [I > 2σ(I)]       | R1 = 0.0540, wR2 = 0.1309                                                                                                       |
| R indices (all data)              | R1 = 0.0868, wR2 = 0.1512                                                                                                       |
| Extinction coefficient            | 0.033(2)                                                                                                                        |
| Largest diff. peak and hole       | 0.235 and -0.317 e.Å <sup>-3</sup>                                                                                              |

Table 2. Atomic coordinates ( $\times 10^4$ ) and equivalent isotropic displacement parameters ( $\text{\AA}^2 \times 10^3$ ) for shelxl.

U(eq) is defined as one third of the trace of the orthogonalized Uij tensor.

|       | x       | y       | z       | U(eq) |
|-------|---------|---------|---------|-------|
| S(1)  | 7952(1) | -231(1) | 4837(1) | 49(1) |
| S(2)  | 500(1)  | 4894(1) | 1297(1) | 46(1) |
| O(1)  | 7008(1) | 208(1)  | 4334(1) | 64(1) |
| O(2)  | 9233(1) | -547(1) | 4438(1) | 63(1) |
| O(3)  | -545(1) | 5532(1) | 948(1)  | 54(1) |
| O(4)  | 427(1)  | 4728(1) | 2194(1) | 64(1) |
| N(1)  | 7966(2) | 607(1)  | 5436(1) | 53(1) |
| N(2)  | 691(2)  | 3796(1) | 961(1)  | 49(1) |
| C(1)  | 6805(2) | 1042(2) | 5989(1) | 55(1) |
| C(2)  | 6533(2) | 2230(1) | 5900(1) | 46(1) |
| C(3)  | 6304(2) | 2640(2) | 4987(1) | 55(1) |
| C(4)  | 6267(2) | 3786(2) | 4790(1) | 53(1) |
| C(5)  | 7538(2) | 4064(2) | 4781(1) | 52(1) |
| C(6)  | 8088(2) | 3473(1) | 5545(1) | 45(1) |
| C(7)  | 9094(2) | 3784(2) | 5757(2) | 69(1) |
| C(8)  | 9650(2) | 3297(2) | 6426(2) | 81(1) |
| C(9)  | 9205(2) | 2481(2) | 6928(2) | 73(1) |
| C(10) | 8202(2) | 2162(2) | 6751(1) | 61(1) |
| C(11) | 7634(2) | 2635(1) | 6058(1) | 45(1) |
| C(12) | 7317(2) | 5236(2) | 4782(2) | 85(1) |
| C(13) | 8451(2) | 3789(2) | 3969(1) | 82(1) |
| C(14) | 5314(2) | 2573(1) | 6531(1) | 46(1) |
| C(15) | 5195(2) | 3324(2) | 7038(1) | 64(1) |

|       |          |          |         |        |
|-------|----------|----------|---------|--------|
| C(16) | 4061(2)  | 3650(2)  | 7576(2) | 85(1)  |
| C(17) | 3037(2)  | 3226(2)  | 7613(2) | 82(1)  |
| C(18) | 3129(2)  | 2487(2)  | 7113(2) | 80(1)  |
| C(19) | 4247(2)  | 2163(2)  | 6571(2) | 67(1)  |
| C(20) | 7436(2)  | -1307(1) | 5496(1) | 44(1)  |
| C(21) | 8292(2)  | -2155(2) | 5751(1) | 55(1)  |
| C(22) | 7874(2)  | -2983(2) | 6275(1) | 64(1)  |
| C(23) | 6606(2)  | -2984(2) | 6556(1) | 59(1)  |
| C(24) | 5763(2)  | -2124(2) | 6290(1) | 59(1)  |
| C(25) | 6158(2)  | -1295(2) | 5761(1) | 52(1)  |
| C(26) | 6153(3)  | -3885(2) | 7129(2) | 95(1)  |
| C(27) | 1728(2)  | 2949(1)  | 1149(1) | 50(1)  |
| C(28) | 1297(2)  | 1897(1)  | 1397(1) | 42(1)  |
| C(29) | 522(2)   | 1764(1)  | 764(1)  | 42(1)  |
| C(30) | 974(2)   | 1994(2)  | -97(1)  | 54(1)  |
| C(31) | 312(2)   | 1933(2)  | -705(1) | 66(1)  |
| C(32) | -816(2)  | 1621(2)  | -465(2) | 67(1)  |
| C(33) | -1279(2) | 1377(2)  | 381(1)  | 60(1)  |
| C(34) | -631(2)  | 1436(1)  | 1014(1) | 45(1)  |
| C(35) | -1223(2) | 1167(2)  | 1947(1) | 52(1)  |
| C(36) | -250(2)  | 1037(2)  | 2506(1) | 57(1)  |
| C(37) | 485(2)   | 1901(2)  | 2295(1) | 52(1)  |
| C(38) | -2332(2) | 2028(2)  | 2209(2) | 82(1)  |
| C(39) | -1699(3) | 141(2)   | 2081(2) | 86(1)  |
| C(40) | 2487(2)  | 1049(2)  | 1409(1) | 49(1)  |
| C(41) | 2719(2)  | 208(2)   | 970(2)  | 76(1)  |
| C(42) | 3805(3)  | -547(2)  | 996(2)  | 107(1) |
| C(43) | 4673(3)  | -466(2)  | 1456(2) | 95(1)  |
| C(44) | 4456(2)  | 356(2)   | 1896(2) | 79(1)  |

|       |         |         |         |        |
|-------|---------|---------|---------|--------|
| C(45) | 3379(2) | 1100(2) | 1876(1) | 62(1)  |
| C(46) | 1852(2) | 5432(1) | 849(1)  | 45(1)  |
| C(47) | 2381(2) | 5879(2) | 1355(1) | 57(1)  |
| C(48) | 3406(2) | 6340(2) | 987(2)  | 67(1)  |
| C(49) | 3909(2) | 6362(2) | 137(2)  | 64(1)  |
| C(50) | 3366(2) | 5902(2) | -353(2) | 69(1)  |
| C(51) | 2337(2) | 5444(2) | -4(1)   | 59(1)  |
| C(52) | 5019(2) | 6878(2) | -255(2) | 100(1) |

---

Table 3. Bond lengths [Å] and angles [deg] for shelxl.

---

|            |            |
|------------|------------|
| S(1)-O(1)  | 1.4289(15) |
| S(1)-O(2)  | 1.4315(14) |
| S(1)-N(1)  | 1.6105(18) |
| S(1)-C(20) | 1.769(2)   |
| S(2)-O(4)  | 1.4259(14) |
| S(2)-O(3)  | 1.4391(14) |
| S(2)-N(2)  | 1.6092(17) |
| S(2)-C(46) | 1.7684(19) |
| N(1)-C(1)  | 1.467(2)   |
| N(1)-H(1)  | 0.886(10)  |
| N(2)-C(27) | 1.467(2)   |
| N(2)-H(2)  | 0.886(9)   |
| C(1)-C(2)  | 1.539(3)   |
| C(1)-H(1A) | 0.9700     |
| C(1)-H(1B) | 0.9700     |
| C(2)-C(11) | 1.525(3)   |

|              |          |
|--------------|----------|
| C(2)-C(14)   | 1.543(3) |
| C(2)-C(3)    | 1.548(3) |
| C(3)-C(4)    | 1.505(3) |
| C(3)-H(3A)   | 0.9700   |
| C(3)-H(3B)   | 0.9700   |
| C(4)-C(5)    | 1.532(3) |
| C(4)-H(4A)   | 0.9700   |
| C(4)-H(4B)   | 0.9700   |
| C(5)-C(6)    | 1.525(3) |
| C(5)-C(13)   | 1.527(3) |
| C(5)-C(12)   | 1.532(3) |
| C(6)-C(7)    | 1.399(3) |
| C(6)-C(11)   | 1.399(3) |
| C(7)-C(8)    | 1.364(3) |
| C(7)-H(7)    | 0.9300   |
| C(8)-C(9)    | 1.366(3) |
| C(8)-H(8)    | 0.9300   |
| C(9)-C(10)   | 1.376(3) |
| C(9)-H(9)    | 0.9300   |
| C(10)-C(11)  | 1.397(3) |
| C(10)-H(10)  | 0.9300   |
| C(12)-H(12A) | 0.9600   |
| C(12)-H(12B) | 0.9600   |
| C(12)-H(12C) | 0.9600   |
| C(13)-H(13A) | 0.9600   |
| C(13)-H(13B) | 0.9600   |
| C(13)-H(13C) | 0.9600   |
| C(14)-C(15)  | 1.372(3) |
| C(14)-C(19)  | 1.396(3) |

|              |          |
|--------------|----------|
| C(15)-C(16)  | 1.396(3) |
| C(15)-H(15)  | 0.9300   |
| C(16)-C(17)  | 1.364(4) |
| C(16)-H(16)  | 0.9300   |
| C(17)-C(18)  | 1.357(4) |
| C(17)-H(17)  | 0.9300   |
| C(18)-C(19)  | 1.387(3) |
| C(18)-H(18)  | 0.9300   |
| C(19)-H(19)  | 0.9300   |
| C(20)-C(21)  | 1.375(3) |
| C(20)-C(25)  | 1.387(2) |
| C(21)-C(22)  | 1.381(3) |
| C(21)-H(21)  | 0.9300   |
| C(22)-C(23)  | 1.382(3) |
| C(22)-H(22)  | 0.9300   |
| C(23)-C(24)  | 1.383(3) |
| C(23)-C(26)  | 1.504(3) |
| C(24)-C(25)  | 1.375(3) |
| C(24)-H(24)  | 0.9300   |
| C(25)-H(25)  | 0.9300   |
| C(26)-H(26A) | 0.9600   |
| C(26)-H(26B) | 0.9600   |
| C(26)-H(26C) | 0.9600   |
| C(27)-C(28)  | 1.548(3) |
| C(27)-H(27A) | 0.9700   |
| C(27)-H(27B) | 0.9700   |
| C(28)-C(29)  | 1.530(2) |
| C(28)-C(40)  | 1.538(3) |
| C(28)-C(37)  | 1.544(3) |

|              |          |
|--------------|----------|
| C(29)-C(30)  | 1.390(3) |
| C(29)-C(34)  | 1.399(2) |
| C(30)-C(31)  | 1.375(3) |
| C(30)-H(30)  | 0.9300   |
| C(31)-C(32)  | 1.363(3) |
| C(31)-H(31)  | 0.9300   |
| C(32)-C(33)  | 1.372(3) |
| C(32)-H(32)  | 0.9300   |
| C(33)-C(34)  | 1.399(3) |
| C(33)-H(33)  | 0.9300   |
| C(34)-C(35)  | 1.536(3) |
| C(35)-C(36)  | 1.519(3) |
| C(35)-C(38)  | 1.527(3) |
| C(35)-C(39)  | 1.543(3) |
| C(36)-C(37)  | 1.510(3) |
| C(36)-H(36A) | 0.9700   |
| C(36)-H(36B) | 0.9700   |
| C(37)-H(37A) | 0.9700   |
| C(37)-H(37B) | 0.9700   |
| C(38)-H(38A) | 0.9600   |
| C(38)-H(38B) | 0.9600   |
| C(38)-H(38C) | 0.9600   |
| C(39)-H(39A) | 0.9600   |
| C(39)-H(39B) | 0.9600   |
| C(39)-H(39C) | 0.9600   |
| C(40)-C(41)  | 1.381(3) |
| C(40)-C(45)  | 1.391(3) |
| C(41)-C(42)  | 1.392(3) |
| C(41)-H(41)  | 0.9300   |

|                 |            |
|-----------------|------------|
| C(42)-C(43)     | 1.372(4)   |
| C(42)-H(42)     | 0.9300     |
| C(43)-C(44)     | 1.363(4)   |
| C(43)-H(43)     | 0.9300     |
| C(44)-C(45)     | 1.376(3)   |
| C(44)-H(44)     | 0.9300     |
| C(45)-H(45)     | 0.9300     |
| C(46)-C(51)     | 1.376(3)   |
| C(46)-C(47)     | 1.383(3)   |
| C(47)-C(48)     | 1.388(3)   |
| C(47)-H(47)     | 0.9300     |
| C(48)-C(49)     | 1.374(3)   |
| C(48)-H(48)     | 0.9300     |
| C(49)-C(50)     | 1.384(3)   |
| C(49)-C(52)     | 1.513(3)   |
| C(50)-C(51)     | 1.384(3)   |
| C(50)-H(50)     | 0.9300     |
| C(51)-H(51)     | 0.9300     |
| C(52)-H(52A)    | 0.9600     |
| C(52)-H(52B)    | 0.9600     |
| C(52)-H(52C)    | 0.9600     |
| O(1)-S(1)-O(2)  | 120.20(9)  |
| O(1)-S(1)-N(1)  | 107.70(10) |
| O(2)-S(1)-N(1)  | 105.88(9)  |
| O(1)-S(1)-C(20) | 106.00(9)  |
| O(2)-S(1)-C(20) | 108.72(9)  |
| N(1)-S(1)-C(20) | 107.83(9)  |
| O(4)-S(2)-O(3)  | 119.26(9)  |
| O(4)-S(2)-N(2)  | 108.84(9)  |



|                  |            |
|------------------|------------|
| O(3)-S(2)-N(2)   | 104.89(9)  |
| O(4)-S(2)-C(46)  | 107.18(9)  |
| O(3)-S(2)-C(46)  | 108.03(8)  |
| N(2)-S(2)-C(46)  | 108.23(9)  |
| C(1)-N(1)-S(1)   | 120.28(14) |
| C(1)-N(1)-H(1)   | 121.3(18)  |
| S(1)-N(1)-H(1)   | 112.1(18)  |
| C(27)-N(2)-S(2)  | 121.07(14) |
| C(27)-N(2)-H(2)  | 110.8(14)  |
| S(2)-N(2)-H(2)   | 117.4(14)  |
| N(1)-C(1)-C(2)   | 113.48(15) |
| N(1)-C(1)-H(1A)  | 108.9      |
| C(2)-C(1)-H(1A)  | 108.9      |
| N(1)-C(1)-H(1B)  | 108.9      |
| C(2)-C(1)-H(1B)  | 108.9      |
| H(1A)-C(1)-H(1B) | 107.7      |
| C(11)-C(2)-C(1)  | 111.29(16) |
| C(11)-C(2)-C(14) | 111.63(15) |
| C(1)-C(2)-C(14)  | 107.68(15) |
| C(11)-C(2)-C(3)  | 109.65(15) |
| C(1)-C(2)-C(3)   | 107.75(16) |
| C(14)-C(2)-C(3)  | 108.73(16) |
| C(4)-C(3)-C(2)   | 111.44(17) |
| C(4)-C(3)-H(3A)  | 109.3      |
| C(2)-C(3)-H(3A)  | 109.3      |
| C(4)-C(3)-H(3B)  | 109.3      |
| C(2)-C(3)-H(3B)  | 109.3      |
| H(3A)-C(3)-H(3B) | 108.0      |
| C(3)-C(4)-C(5)   | 112.21(17) |

|                   |            |
|-------------------|------------|
| C(3)-C(4)-H(4A)   | 109.2      |
| C(5)-C(4)-H(4A)   | 109.2      |
| C(3)-C(4)-H(4B)   | 109.2      |
| C(5)-C(4)-H(4B)   | 109.2      |
| H(4A)-C(4)-H(4B)  | 107.9      |
| C(6)-C(5)-C(13)   | 109.21(17) |
| C(6)-C(5)-C(12)   | 111.76(19) |
| C(13)-C(5)-C(12)  | 108.34(19) |
| C(6)-C(5)-C(4)    | 110.20(16) |
| C(13)-C(5)-C(4)   | 109.8(2)   |
| C(12)-C(5)-C(4)   | 107.51(17) |
| C(7)-C(6)-C(11)   | 117.69(18) |
| C(7)-C(6)-C(5)    | 118.72(18) |
| C(11)-C(6)-C(5)   | 123.59(17) |
| C(8)-C(7)-C(6)    | 122.7(2)   |
| C(8)-C(7)-H(7)    | 118.7      |
| C(6)-C(7)-H(7)    | 118.7      |
| C(7)-C(8)-C(9)    | 119.6(2)   |
| C(7)-C(8)-H(8)    | 120.2      |
| C(9)-C(8)-H(8)    | 120.2      |
| C(8)-C(9)-C(10)   | 119.5(2)   |
| C(8)-C(9)-H(9)    | 120.3      |
| C(10)-C(9)-H(9)   | 120.3      |
| C(9)-C(10)-C(11)  | 122.0(2)   |
| C(9)-C(10)-H(10)  | 119.0      |
| C(11)-C(10)-H(10) | 119.0      |
| C(10)-C(11)-C(6)  | 118.52(18) |
| C(10)-C(11)-C(2)  | 118.80(17) |
| C(6)-C(11)-C(2)   | 122.67(17) |

|                     |            |
|---------------------|------------|
| C(5)-C(12)-H(12A)   | 109.5      |
| C(5)-C(12)-H(12B)   | 109.5      |
| H(12A)-C(12)-H(12B) | 109.5      |
| C(5)-C(12)-H(12C)   | 109.5      |
| H(12A)-C(12)-H(12C) | 109.5      |
| H(12B)-C(12)-H(12C) | 109.5      |
| C(5)-C(13)-H(13A)   | 109.5      |
| C(5)-C(13)-H(13B)   | 109.5      |
| H(13A)-C(13)-H(13B) | 109.5      |
| C(5)-C(13)-H(13C)   | 109.5      |
| H(13A)-C(13)-H(13C) | 109.5      |
| H(13B)-C(13)-H(13C) | 109.5      |
| C(15)-C(14)-C(19)   | 116.85(19) |
| C(15)-C(14)-C(2)    | 122.67(18) |
| C(19)-C(14)-C(2)    | 120.38(18) |
| C(14)-C(15)-C(16)   | 121.3(2)   |
| C(14)-C(15)-H(15)   | 119.3      |
| C(16)-C(15)-H(15)   | 119.3      |
| C(17)-C(16)-C(15)   | 120.7(2)   |
| C(17)-C(16)-H(16)   | 119.7      |
| C(15)-C(16)-H(16)   | 119.7      |
| C(18)-C(17)-C(16)   | 119.1(2)   |
| C(18)-C(17)-H(17)   | 120.5      |
| C(16)-C(17)-H(17)   | 120.5      |
| C(17)-C(18)-C(19)   | 120.8(2)   |
| C(17)-C(18)-H(18)   | 119.6      |
| C(19)-C(18)-H(18)   | 119.6      |
| C(18)-C(19)-C(14)   | 121.3(2)   |
| C(18)-C(19)-H(19)   | 119.4      |

|                     |            |
|---------------------|------------|
| C(14)-C(19)-H(19)   | 119.4      |
| C(21)-C(20)-C(25)   | 119.63(18) |
| C(21)-C(20)-S(1)    | 120.55(15) |
| C(25)-C(20)-S(1)    | 119.82(15) |
| C(20)-C(21)-C(22)   | 119.82(19) |
| C(20)-C(21)-H(21)   | 120.1      |
| C(22)-C(21)-H(21)   | 120.1      |
| C(21)-C(22)-C(23)   | 121.6(2)   |
| C(21)-C(22)-H(22)   | 119.2      |
| C(23)-C(22)-H(22)   | 119.2      |
| C(22)-C(23)-C(24)   | 117.6(2)   |
| C(22)-C(23)-C(26)   | 121.5(2)   |
| C(24)-C(23)-C(26)   | 120.9(2)   |
| C(25)-C(24)-C(23)   | 121.8(2)   |
| C(25)-C(24)-H(24)   | 119.1      |
| C(23)-C(24)-H(24)   | 119.1      |
| C(24)-C(25)-C(20)   | 119.59(19) |
| C(24)-C(25)-H(25)   | 120.2      |
| C(20)-C(25)-H(25)   | 120.2      |
| C(23)-C(26)-H(26A)  | 109.5      |
| C(23)-C(26)-H(26B)  | 109.5      |
| H(26A)-C(26)-H(26B) | 109.5      |
| C(23)-C(26)-H(26C)  | 109.5      |
| H(26A)-C(26)-H(26C) | 109.5      |
| H(26B)-C(26)-H(26C) | 109.5      |
| N(2)-C(27)-C(28)    | 111.86(15) |
| N(2)-C(27)-H(27A)   | 109.2      |
| C(28)-C(27)-H(27A)  | 109.2      |
| N(2)-C(27)-H(27B)   | 109.2      |

|                     |            |
|---------------------|------------|
| C(28)-C(27)-H(27B)  | 109.2      |
| H(27A)-C(27)-H(27B) | 107.9      |
| C(29)-C(28)-C(40)   | 112.10(15) |
| C(29)-C(28)-C(37)   | 110.15(15) |
| C(40)-C(28)-C(37)   | 109.89(16) |
| C(29)-C(28)-C(27)   | 109.71(15) |
| C(40)-C(28)-C(27)   | 107.37(15) |
| C(37)-C(28)-C(27)   | 107.47(16) |
| C(30)-C(29)-C(34)   | 118.50(18) |
| C(30)-C(29)-C(28)   | 118.55(16) |
| C(34)-C(29)-C(28)   | 122.95(16) |
| C(31)-C(30)-C(29)   | 122.2(2)   |
| C(31)-C(30)-H(30)   | 118.9      |
| C(29)-C(30)-H(30)   | 118.9      |
| C(32)-C(31)-C(30)   | 119.5(2)   |
| C(32)-C(31)-H(31)   | 120.2      |
| C(30)-C(31)-H(31)   | 120.2      |
| C(31)-C(32)-C(33)   | 119.6(2)   |
| C(31)-C(32)-H(32)   | 120.2      |
| C(33)-C(32)-H(32)   | 120.2      |
| C(32)-C(33)-C(34)   | 122.2(2)   |
| C(32)-C(33)-H(33)   | 118.9      |
| C(34)-C(33)-H(33)   | 118.9      |
| C(29)-C(34)-C(33)   | 117.99(18) |
| C(29)-C(34)-C(35)   | 122.98(17) |
| C(33)-C(34)-C(35)   | 119.01(17) |
| C(36)-C(35)-C(38)   | 109.89(19) |
| C(36)-C(35)-C(34)   | 110.01(16) |
| C(38)-C(35)-C(34)   | 109.50(18) |

|                     |            |
|---------------------|------------|
| C(36)-C(35)-C(39)   | 107.70(19) |
| C(38)-C(35)-C(39)   | 108.8(2)   |
| C(34)-C(35)-C(39)   | 110.90(18) |
| C(37)-C(36)-C(35)   | 112.54(17) |
| C(37)-C(36)-H(36A)  | 109.1      |
| C(35)-C(36)-H(36A)  | 109.1      |
| C(37)-C(36)-H(36B)  | 109.1      |
| C(35)-C(36)-H(36B)  | 109.1      |
| H(36A)-C(36)-H(36B) | 107.8      |
| C(36)-C(37)-C(28)   | 111.44(16) |
| C(36)-C(37)-H(37A)  | 109.3      |
| C(28)-C(37)-H(37A)  | 109.3      |
| C(36)-C(37)-H(37B)  | 109.3      |
| C(28)-C(37)-H(37B)  | 109.3      |
| H(37A)-C(37)-H(37B) | 108.0      |
| C(35)-C(38)-H(38A)  | 109.5      |
| C(35)-C(38)-H(38B)  | 109.5      |
| H(38A)-C(38)-H(38B) | 109.5      |
| C(35)-C(38)-H(38C)  | 109.5      |
| H(38A)-C(38)-H(38C) | 109.5      |
| H(38B)-C(38)-H(38C) | 109.5      |
| C(35)-C(39)-H(39A)  | 109.5      |
| C(35)-C(39)-H(39B)  | 109.5      |
| H(39A)-C(39)-H(39B) | 109.5      |
| C(35)-C(39)-H(39C)  | 109.5      |
| H(39A)-C(39)-H(39C) | 109.5      |
| H(39B)-C(39)-H(39C) | 109.5      |
| C(41)-C(40)-C(45)   | 117.0(2)   |
| C(41)-C(40)-C(28)   | 122.41(19) |

|                   |            |
|-------------------|------------|
| C(45)-C(40)-C(28) | 120.55(18) |
| C(40)-C(41)-C(42) | 121.0(3)   |
| C(40)-C(41)-H(41) | 119.5      |
| C(42)-C(41)-H(41) | 119.5      |
| C(43)-C(42)-C(41) | 120.4(3)   |
| C(43)-C(42)-H(42) | 119.8      |
| C(41)-C(42)-H(42) | 119.8      |
| C(44)-C(43)-C(42) | 119.4(3)   |
| C(44)-C(43)-H(43) | 120.3      |
| C(42)-C(43)-H(43) | 120.3      |
| C(43)-C(44)-C(45) | 120.3(3)   |
| C(43)-C(44)-H(44) | 119.9      |
| C(45)-C(44)-H(44) | 119.9      |
| C(44)-C(45)-C(40) | 121.9(2)   |
| C(44)-C(45)-H(45) | 119.1      |
| C(40)-C(45)-H(45) | 119.1      |
| C(51)-C(46)-C(47) | 120.45(18) |
| C(51)-C(46)-S(2)  | 120.05(15) |
| C(47)-C(46)-S(2)  | 119.43(15) |
| C(46)-C(47)-C(48) | 118.8(2)   |
| C(46)-C(47)-H(47) | 120.6      |
| C(48)-C(47)-H(47) | 120.6      |
| C(49)-C(48)-C(47) | 121.9(2)   |
| C(49)-C(48)-H(48) | 119.1      |
| C(47)-C(48)-H(48) | 119.1      |
| C(48)-C(49)-C(50) | 118.06(19) |
| C(48)-C(49)-C(52) | 121.2(2)   |
| C(50)-C(49)-C(52) | 120.8(2)   |
| C(51)-C(50)-C(49) | 121.3(2)   |

|                     |          |
|---------------------|----------|
| C(51)-C(50)-H(50)   | 119.4    |
| C(49)-C(50)-H(50)   | 119.4    |
| C(46)-C(51)-C(50)   | 119.5(2) |
| C(46)-C(51)-H(51)   | 120.3    |
| C(50)-C(51)-H(51)   | 120.3    |
| C(49)-C(52)-H(52A)  | 109.5    |
| C(49)-C(52)-H(52B)  | 109.5    |
| H(52A)-C(52)-H(52B) | 109.5    |
| C(49)-C(52)-H(52C)  | 109.5    |
| H(52A)-C(52)-H(52C) | 109.5    |
| H(52B)-C(52)-H(52C) | 109.5    |

---

Symmetry transformations used to generate equivalent atoms:

Table 4. Anisotropic displacement parameters ( $\text{\AA}^2 \times 10^3$ ) for shelxl.

The anisotropic displacement factor exponent takes the form:

$$-2 \pi^2 [ h^2 a^{*2} U_{11} + \dots + 2 h k a^* b^* U_{12} ]$$

---

|      | U11   | U22   | U33   | U23    | U13    | U12    |
|------|-------|-------|-------|--------|--------|--------|
| S(1) | 44(1) | 46(1) | 50(1) | -6(1)  | 0(1)   | -3(1)  |
| S(2) | 46(1) | 42(1) | 49(1) | -6(1)  | -3(1)  | -11(1) |
| O(1) | 63(1) | 65(1) | 58(1) | 4(1)   | -18(1) | 1(1)   |
| O(2) | 47(1) | 62(1) | 66(1) | -12(1) | 12(1)  | -3(1)  |
| O(3) | 44(1) | 48(1) | 68(1) | -7(1)  | -7(1)  | -4(1)  |
| O(4) | 80(1) | 68(1) | 45(1) | -6(1)  | -2(1)  | -29(1) |
| N(1) | 41(1) | 46(1) | 68(1) | -16(1) | 4(1)   | -7(1)  |
| N(2) | 52(1) | 40(1) | 58(1) | -6(1)  | -15(1) | -10(1) |



|       |        |        |        |        |        |        |
|-------|--------|--------|--------|--------|--------|--------|
| C(1)  | 48(1)  | 43(1)  | 63(1)  | -9(1)  | 9(1)   | -7(1)  |
| C(2)  | 42(1)  | 41(1)  | 51(1)  | -6(1)  | -1(1)  | -8(1)  |
| C(3)  | 56(1)  | 58(1)  | 54(1)  | -8(1)  | -13(1) | -13(1) |
| C(4)  | 45(1)  | 57(1)  | 51(1)  | 1(1)   | -11(1) | -6(1)  |
| C(5)  | 46(1)  | 49(1)  | 55(1)  | 5(1)   | -5(1)  | -8(1)  |
| C(6)  | 35(1)  | 49(1)  | 47(1)  | -5(1)  | -4(1)  | -8(1)  |
| C(7)  | 54(1)  | 78(2)  | 80(2)  | -2(1)  | -17(1) | -23(1) |
| C(8)  | 62(2)  | 108(2) | 84(2)  | -11(2) | -29(1) | -23(2) |
| C(9)  | 69(2)  | 90(2)  | 61(1)  | -11(1) | -29(1) | 0(1)   |
| C(10) | 61(1)  | 64(1)  | 51(1)  | 2(1)   | -14(1) | -3(1)  |
| C(11) | 39(1)  | 44(1)  | 47(1)  | -9(1)  | -4(1)  | -1(1)  |
| C(12) | 82(2)  | 57(2)  | 115(2) | 14(1)  | -28(2) | -21(1) |
| C(13) | 56(1)  | 118(2) | 54(1)  | 9(1)   | 4(1)   | -8(1)  |
| C(14) | 40(1)  | 42(1)  | 49(1)  | -2(1)  | -1(1)  | -3(1)  |
| C(15) | 53(1)  | 63(1)  | 69(1)  | -21(1) | 3(1)   | -7(1)  |
| C(16) | 73(2)  | 87(2)  | 85(2)  | -37(2) | 13(1)  | 0(2)   |
| C(17) | 52(1)  | 82(2)  | 87(2)  | -7(2)  | 19(1)  | 7(1)   |
| C(18) | 42(1)  | 69(2)  | 113(2) | -2(2)  | 9(1)   | -6(1)  |
| C(19) | 46(1)  | 57(1)  | 92(2)  | -16(1) | 2(1)   | -9(1)  |
| C(20) | 42(1)  | 44(1)  | 45(1)  | -10(1) | -10(1) | -4(1)  |
| C(21) | 44(1)  | 50(1)  | 69(1)  | -6(1)  | -13(1) | -4(1)  |
| C(22) | 66(2)  | 51(1)  | 74(2)  | 1(1)   | -24(1) | -5(1)  |
| C(23) | 72(2)  | 60(1)  | 52(1)  | -4(1)  | -17(1) | -24(1) |
| C(24) | 52(1)  | 74(2)  | 57(1)  | -9(1)  | -9(1)  | -24(1) |
| C(25) | 43(1)  | 55(1)  | 59(1)  | -9(1)  | -15(1) | -7(1)  |
| C(26) | 118(2) | 86(2)  | 84(2)  | 17(2)  | -21(2) | -47(2) |
| C(27) | 44(1)  | 43(1)  | 63(1)  | -4(1)  | -10(1) | -11(1) |
| C(28) | 41(1)  | 39(1)  | 46(1)  | -6(1)  | -4(1)  | -11(1) |
| C(29) | 45(1)  | 35(1)  | 44(1)  | -4(1)  | -2(1)  | -11(1) |

|       |        |        |        |        |        |        |
|-------|--------|--------|--------|--------|--------|--------|
| C(30) | 65(1)  | 53(1)  | 45(1)  | -3(1)  | -3(1)  | -24(1) |
| C(31) | 99(2)  | 56(1)  | 46(1)  | -5(1)  | -10(1) | -26(1) |
| C(32) | 85(2)  | 65(2)  | 60(1)  | -9(1)  | -29(1) | -16(1) |
| C(33) | 52(1)  | 63(1)  | 70(2)  | -12(1) | -16(1) | -18(1) |
| C(34) | 44(1)  | 40(1)  | 53(1)  | -8(1)  | -6(1)  | -10(1) |
| C(35) | 46(1)  | 56(1)  | 54(1)  | -8(1)  | 3(1)   | -19(1) |
| C(36) | 61(1)  | 60(1)  | 46(1)  | 3(1)   | 0(1)   | -19(1) |
| C(37) | 54(1)  | 60(1)  | 46(1)  | -9(1)  | -7(1)  | -16(1) |
| C(38) | 52(1)  | 103(2) | 83(2)  | -29(2) | 4(1)   | -3(1)  |
| C(39) | 102(2) | 90(2)  | 74(2)  | -9(1)  | 9(1)   | -62(2) |
| C(40) | 47(1)  | 45(1)  | 52(1)  | 0(1)   | -4(1)  | -10(1) |
| C(41) | 75(2)  | 60(1)  | 93(2)  | -25(1) | -22(1) | 5(1)   |
| C(42) | 108(2) | 79(2)  | 124(3) | -39(2) | -31(2) | 28(2)  |
| C(43) | 72(2)  | 90(2)  | 101(2) | -3(2)  | -18(2) | 24(2)  |
| C(44) | 59(2)  | 83(2)  | 87(2)  | 6(2)   | -21(1) | -2(1)  |
| C(45) | 57(1)  | 59(1)  | 71(1)  | -3(1)  | -20(1) | -8(1)  |
| C(46) | 44(1)  | 38(1)  | 51(1)  | -4(1)  | -9(1)  | -6(1)  |
| C(47) | 57(1)  | 56(1)  | 61(1)  | -6(1)  | -14(1) | -16(1) |
| C(48) | 59(1)  | 63(1)  | 88(2)  | -8(1)  | -26(1) | -20(1) |
| C(49) | 43(1)  | 54(1)  | 93(2)  | -3(1)  | -6(1)  | -12(1) |
| C(50) | 58(1)  | 73(2)  | 67(2)  | -6(1)  | 8(1)   | -18(1) |
| C(51) | 56(1)  | 66(1)  | 59(1)  | -13(1) | -4(1)  | -21(1) |
| C(52) | 60(2)  | 91(2)  | 143(3) | -2(2)  | 1(2)   | -35(2) |

---

Table 5. Hydrogen coordinates ( $\times 10^4$ ) and isotropic displacement parameters ( $\text{\AA}^2 \times 10^3$ ) for shelxl.

---

|  | x | y | z | U(eq) |
|--|---|---|---|-------|
|--|---|---|---|-------|

---

|        |       |       |      |     |
|--------|-------|-------|------|-----|
| H(1A)  | 6866  | 771   | 6574 | 65  |
| H(1B)  | 6104  | 815   | 5857 | 65  |
| H(3A)  | 6971  | 2284  | 4586 | 66  |
| H(3B)  | 5513  | 2493  | 4924 | 66  |
| H(4A)  | 5631  | 4137  | 5210 | 63  |
| H(4B)  | 6027  | 4029  | 4240 | 63  |
| H(7)   | 9397  | 4347  | 5427 | 83  |
| H(8)   | 10327 | 3519  | 6540 | 98  |
| H(9)   | 9578  | 2142  | 7385 | 88  |
| H(10)  | 7892  | 1616  | 7102 | 73  |
| H(12A) | 6759  | 5421  | 5294 | 128 |
| H(12B) | 6948  | 5582  | 4302 | 128 |
| H(12C) | 8106  | 5439  | 4749 | 128 |
| H(13A) | 9239  | 3980  | 3960 | 123 |
| H(13B) | 8104  | 4155  | 3486 | 123 |
| H(13C) | 8584  | 3058  | 3951 | 123 |
| H(15)  | 5882  | 3622  | 7023 | 76  |
| H(16)  | 4003  | 4162  | 7912 | 102 |
| H(17)  | 2285  | 3440  | 7976 | 99  |
| H(18)  | 2435  | 2194  | 7134 | 96  |
| H(19)  | 4286  | 1663  | 6228 | 80  |
| H(21)  | 9150  | -2171 | 5572 | 66  |
| H(22)  | 8460  | -3554 | 6443 | 77  |
| H(24)  | 4905  | -2104 | 6473 | 70  |
| H(25)  | 5573  | -731  | 5582 | 62  |
| H(26A) | 6562  | -4514 | 6897 | 142 |
| H(26B) | 5259  | -3800 | 7176 | 142 |
| H(26C) | 6349  | -3916 | 7680 | 142 |

|        |         |          |        |       |
|--------|---------|----------|--------|-------|
| H(27A) | 2063    | 3094     | 1610   | 60    |
| H(27B) | 2397    | 2909     | 655    | 60    |
| H(30)  | 1750    | 2195     | -268   | 65    |
| H(31)  | 632     | 2103     | -1277  | 79    |
| H(32)  | -1270   | 1574     | -871   | 81    |
| H(33)  | -2049   | 1165     | 538    | 72    |
| H(36A) | -671    | 1014     | 3094   | 68    |
| H(36B) | 330     | 383      | 2440   | 68    |
| H(37A) | 1025    | 1824     | 2707   | 63    |
| H(37B) | -95     | 2559     | 2330   | 63    |
| H(38A) | -2054   | 2676     | 2099   | 123   |
| H(38B) | -2660   | 1886     | 2804   | 123   |
| H(38C) | -2978   | 2062     | 1891   | 123   |
| H(39A) | -2352   | 215      | 1759   | 128   |
| H(39B) | -2026   | -29      | 2672   | 128   |
| H(39C) | -1016   | -400     | 1895   | 128   |
| H(41)  | 2141    | 145      | 653    | 91    |
| H(42)  | 3943    | -1110    | 699    | 128   |
| H(43)  | 5402    | -968     | 1467   | 114   |
| H(44)  | 5038    | 415      | 2211   | 95    |
| H(45)  | 3245    | 1653     | 2184   | 74    |
| H(47)  | 2055    | 5872     | 1932   | 68    |
| H(48)  | 3763    | 6643     | 1325   | 80    |
| H(50)  | 3700    | 5900     | -928   | 82    |
| H(51)  | 1976    | 5146     | -344   | 71    |
| H(52A) | 4738    | 7521     | -585   | 149   |
| H(52B) | 5628    | 6433     | -614   | 149   |
| H(52C) | 5396    | 7007     | 185    | 149   |
| H(2)   | 549(19) | 3801(17) | 445(8) | 63(7) |

---

|      |          |         |          |       |
|------|----------|---------|----------|-------|
| H(1) | 8712(14) | 530(20) | 5578(16) | 90(9) |
|------|----------|---------|----------|-------|

---

Table 6. Torsion angles [deg] for shelxl.

---

|                       |             |
|-----------------------|-------------|
| O(1)-S(1)-N(1)-C(1)   | 54.45(17)   |
| O(2)-S(1)-N(1)-C(1)   | -175.78(15) |
| C(20)-S(1)-N(1)-C(1)  | -59.54(18)  |
| O(4)-S(2)-N(2)-C(27)  | -54.72(17)  |
| O(3)-S(2)-N(2)-C(27)  | 176.59(14)  |
| C(46)-S(2)-N(2)-C(27) | 61.45(16)   |
| S(1)-N(1)-C(1)-C(2)   | -129.16(17) |
| N(1)-C(1)-C(2)-C(11)  | -55.9(2)    |
| N(1)-C(1)-C(2)-C(14)  | -178.49(16) |
| N(1)-C(1)-C(2)-C(3)   | 64.4(2)     |
| C(11)-C(2)-C(3)-C(4)  | -48.2(2)    |
| C(1)-C(2)-C(3)-C(4)   | -169.50(16) |
| C(14)-C(2)-C(3)-C(4)  | 74.1(2)     |
| C(2)-C(3)-C(4)-C(5)   | 65.3(2)     |
| C(3)-C(4)-C(5)-C(6)   | -45.0(2)    |
| C(3)-C(4)-C(5)-C(13)  | 75.3(2)     |
| C(3)-C(4)-C(5)-C(12)  | -167.07(19) |
| C(13)-C(5)-C(6)-C(7)  | 73.4(3)     |
| C(12)-C(5)-C(6)-C(7)  | -46.4(3)    |
| C(4)-C(5)-C(6)-C(7)   | -165.91(19) |
| C(13)-C(5)-C(6)-C(11) | -107.3(2)   |
| C(12)-C(5)-C(6)-C(11) | 132.9(2)    |
| C(4)-C(5)-C(6)-C(11)  | 13.4(3)     |
| C(11)-C(6)-C(7)-C(8)  | 1.0(3)      |

|                         |             |
|-------------------------|-------------|
| C(5)-C(6)-C(7)-C(8)     | -179.6(2)   |
| C(6)-C(7)-C(8)-C(9)     | -1.2(4)     |
| C(7)-C(8)-C(9)-C(10)    | -0.1(4)     |
| C(8)-C(9)-C(10)-C(11)   | 1.5(4)      |
| C(9)-C(10)-C(11)-C(6)   | -1.6(3)     |
| C(9)-C(10)-C(11)-C(2)   | 179.4(2)    |
| C(7)-C(6)-C(11)-C(10)   | 0.3(3)      |
| C(5)-C(6)-C(11)-C(10)   | -179.00(19) |
| C(7)-C(6)-C(11)-C(2)    | 179.26(18)  |
| C(5)-C(6)-C(11)-C(2)    | -0.1(3)     |
| C(1)-C(2)-C(11)-C(10)   | -45.0(2)    |
| C(14)-C(2)-C(11)-C(10)  | 75.4(2)     |
| C(3)-C(2)-C(11)-C(10)   | -164.09(18) |
| C(1)-C(2)-C(11)-C(6)    | 136.09(18)  |
| C(14)-C(2)-C(11)-C(6)   | -103.6(2)   |
| C(3)-C(2)-C(11)-C(6)    | 17.0(2)     |
| C(11)-C(2)-C(14)-C(15)  | 13.0(3)     |
| C(1)-C(2)-C(14)-C(15)   | 135.4(2)    |
| C(3)-C(2)-C(14)-C(15)   | -108.1(2)   |
| C(11)-C(2)-C(14)-C(19)  | -170.80(18) |
| C(1)-C(2)-C(14)-C(19)   | -48.4(2)    |
| C(3)-C(2)-C(14)-C(19)   | 68.1(2)     |
| C(19)-C(14)-C(15)-C(16) | 0.8(3)      |
| C(2)-C(14)-C(15)-C(16)  | 177.1(2)    |
| C(14)-C(15)-C(16)-C(17) | 0.2(4)      |
| C(15)-C(16)-C(17)-C(18) | -0.6(4)     |
| C(16)-C(17)-C(18)-C(19) | 0.1(4)      |
| C(17)-C(18)-C(19)-C(14) | 0.9(4)      |
| C(15)-C(14)-C(19)-C(18) | -1.3(3)     |

|                         |             |
|-------------------------|-------------|
| C(2)-C(14)-C(19)-C(18)  | -177.8(2)   |
| O(1)-S(1)-C(20)-C(21)   | 149.19(16)  |
| O(2)-S(1)-C(20)-C(21)   | 18.67(19)   |
| N(1)-S(1)-C(20)-C(21)   | -95.70(17)  |
| O(1)-S(1)-C(20)-C(25)   | -31.11(18)  |
| O(2)-S(1)-C(20)-C(25)   | -161.62(15) |
| N(1)-S(1)-C(20)-C(25)   | 84.01(17)   |
| C(25)-C(20)-C(21)-C(22) | -0.6(3)     |
| S(1)-C(20)-C(21)-C(22)  | 179.13(16)  |
| C(20)-C(21)-C(22)-C(23) | -0.2(3)     |
| C(21)-C(22)-C(23)-C(24) | 0.3(3)      |
| C(21)-C(22)-C(23)-C(26) | -179.7(2)   |
| C(22)-C(23)-C(24)-C(25) | 0.4(3)      |
| C(26)-C(23)-C(24)-C(25) | -179.6(2)   |
| C(23)-C(24)-C(25)-C(20) | -1.2(3)     |
| C(21)-C(20)-C(25)-C(24) | 1.3(3)      |
| S(1)-C(20)-C(25)-C(24)  | -178.44(15) |
| S(2)-N(2)-C(27)-C(28)   | 137.63(15)  |
| N(2)-C(27)-C(28)-C(29)  | 47.1(2)     |
| N(2)-C(27)-C(28)-C(40)  | 169.18(16)  |
| N(2)-C(27)-C(28)-C(37)  | -72.6(2)    |
| C(40)-C(28)-C(29)-C(30) | -73.0(2)    |
| C(37)-C(28)-C(29)-C(30) | 164.32(17)  |
| C(27)-C(28)-C(29)-C(30) | 46.2(2)     |
| C(40)-C(28)-C(29)-C(34) | 108.05(19)  |
| C(37)-C(28)-C(29)-C(34) | -14.6(2)    |
| C(27)-C(28)-C(29)-C(34) | -132.75(18) |
| C(34)-C(29)-C(30)-C(31) | 1.6(3)      |
| C(28)-C(29)-C(30)-C(31) | -177.45(19) |

|                         |             |
|-------------------------|-------------|
| C(29)-C(30)-C(31)-C(32) | -1.1(3)     |
| C(30)-C(31)-C(32)-C(33) | 0.3(4)      |
| C(31)-C(32)-C(33)-C(34) | 0.0(4)      |
| C(30)-C(29)-C(34)-C(33) | -1.2(3)     |
| C(28)-C(29)-C(34)-C(33) | 177.77(18)  |
| C(30)-C(29)-C(34)-C(35) | -179.67(18) |
| C(28)-C(29)-C(34)-C(35) | -0.7(3)     |
| C(32)-C(33)-C(34)-C(29) | 0.4(3)      |
| C(32)-C(33)-C(34)-C(35) | 179.0(2)    |
| C(29)-C(34)-C(35)-C(36) | -14.8(3)    |
| C(33)-C(34)-C(35)-C(36) | 166.77(18)  |
| C(29)-C(34)-C(35)-C(38) | 106.1(2)    |
| C(33)-C(34)-C(35)-C(38) | -72.4(2)    |
| C(29)-C(34)-C(35)-C(39) | -133.8(2)   |
| C(33)-C(34)-C(35)-C(39) | 47.7(3)     |
| C(38)-C(35)-C(36)-C(37) | -73.9(2)    |
| C(34)-C(35)-C(36)-C(37) | 46.8(2)     |
| C(39)-C(35)-C(36)-C(37) | 167.76(18)  |
| C(35)-C(36)-C(37)-C(28) | -65.3(2)    |
| C(29)-C(28)-C(37)-C(36) | 45.9(2)     |
| C(40)-C(28)-C(37)-C(36) | -78.1(2)    |
| C(27)-C(28)-C(37)-C(36) | 165.39(16)  |
| C(29)-C(28)-C(40)-C(41) | -7.4(3)     |
| C(37)-C(28)-C(40)-C(41) | 115.5(2)    |
| C(27)-C(28)-C(40)-C(41) | -127.9(2)   |
| C(29)-C(28)-C(40)-C(45) | 173.14(17)  |
| C(37)-C(28)-C(40)-C(45) | -64.0(2)    |
| C(27)-C(28)-C(40)-C(45) | 52.6(2)     |
| C(45)-C(40)-C(41)-C(42) | -0.4(4)     |



|                         |             |
|-------------------------|-------------|
| C(28)-C(40)-C(41)-C(42) | -179.9(2)   |
| C(40)-C(41)-C(42)-C(43) | -0.3(5)     |
| C(41)-C(42)-C(43)-C(44) | 0.7(5)      |
| C(42)-C(43)-C(44)-C(45) | -0.3(4)     |
| C(43)-C(44)-C(45)-C(40) | -0.5(4)     |
| C(41)-C(40)-C(45)-C(44) | 0.8(3)      |
| C(28)-C(40)-C(45)-C(44) | -179.69(19) |
| O(4)-S(2)-C(46)-C(51)   | 164.27(16)  |
| O(3)-S(2)-C(46)-C(51)   | -66.04(18)  |
| N(2)-S(2)-C(46)-C(51)   | 47.03(19)   |
| O(4)-S(2)-C(46)-C(47)   | -18.62(18)  |
| O(3)-S(2)-C(46)-C(47)   | 111.07(16)  |
| N(2)-S(2)-C(46)-C(47)   | -135.86(16) |
| C(51)-C(46)-C(47)-C(48) | 0.0(3)      |
| S(2)-C(46)-C(47)-C(48)  | -177.06(16) |
| C(46)-C(47)-C(48)-C(49) | -0.1(3)     |
| C(47)-C(48)-C(49)-C(50) | -0.4(3)     |
| C(47)-C(48)-C(49)-C(52) | 179.4(2)    |
| C(48)-C(49)-C(50)-C(51) | 0.9(3)      |
| C(52)-C(49)-C(50)-C(51) | -178.9(2)   |
| C(47)-C(46)-C(51)-C(50) | 0.5(3)      |
| S(2)-C(46)-C(51)-C(50)  | 177.54(17)  |
| C(49)-C(50)-C(51)-C(46) | -0.9(3)     |

---

Symmetry transformations used to generate equivalent atoms:

Table 7. Hydrogen bonds for shelxl [A and deg.].

---

| D-H...A | d(D-H) | d(H...A) | d(D...A) | <(DHA) |
|---------|--------|----------|----------|--------|
|---------|--------|----------|----------|--------|

|                    |           |           |          |           |
|--------------------|-----------|-----------|----------|-----------|
| N(2)-H(2)...O(3)#1 | 0.886(9)  | 2.293(13) | 3.114(2) | 154.2(19) |
| N(1)-H(1)...O(2)#2 | 0.886(10) | 2.277(12) | 3.139(2) | 164(2)    |

---

Symmetry transformations used to generate equivalent atoms:

#1  $-x, -y+1, -z$     #2  $-x+2, -y, -z+1$
